# Supplementary material
Source: publisher figshare collection journal article supplement (https://springernature.figshare.com/articles/dataset/_/12675098)
Supplement: Supplementary file 1 [file 1]

## Sheet: PLANILHA_CLINICO_LABORATORIAL
PATIENT	AGE RANGE	Clinical Severity Score 1 HOME TREATMENT 2 HOSPITALIZATION 3 ICU	SYMPTOM ONSET	RESULT	DEATH?	Outros Achados de Imagem 0 Sem achados adicionais 1 Espessamento septal / Pavimentação em mosaico 2 Ectasia/espessamento brônquico 3 Consolidações 4 Consolidações e Espessamento septal / Pavimentação em mosaico 5 Consolidações e Espessamento septal / Pavimentação em mosaico e Ectasia/espessamento brônquico 6 Espessamento septal / Pavimentação em mosaico e Ectasia/espessamento brônquico	Score RAD	Padrão das Lesões	Aspecto Redondo?	Pav Mosaico?	Sinal do Halo Reverso?	Espessamento Brônquico?	Derrame Pleural?	LinfadeNOmegalia?	Distribuição das Lesões	Dois ou mais Lobos Afetados?	Bilateral?	Lobo Sup Dir?	Lobo Médio?	Lobo Inf Dir?	Lobo Sup Esq?	Lobo Inf Esq?	Radiologia Compatível?	Outros Achados de Imagem 0 Sem achados adicionais 1 Espessamento septal / Pavimentação em mosaico 2 Ectasia/espessamento brônquico 3 Consolidações 4 Consolidações e Espessamento septal / Pavimentação em mosaico 5 Consolidações e Espessamento septal / Pavimentação em mosaico e Ectasia/espessamento brônquico 6 Espessamento septal / Pavimentação em mosaico e Ectasia/espessamento brônquico	Score RAD	Padrão das Lesões	SEGUIMENTO	Aspecto Redondo?	Pav Mosaico?	Sinal do Halo Reverso?	Espessamento Brônquico?	Derrame Pleural?	LinfadeNOmegalia?	Distribuição das Lesões	Dois ou mais Lobos Afetados?	Bilateral?	Lobo Sup Dir?	Lobo Médio?	Lobo Inf Dir?	Lobo Sup Esq?	Lobo Inf Esq?	DYSPNOEA?	FEVER?	COUGH?	ABDOMINAL SYMPTOMS?	HEADACHE?	CORYZA?	INAPPETENCE?	ASTHENIA?
1	51-60	1	2020-03-08	POSITIVE FOR COVID	YES	1	1 - Leve (<25%)	Vidro Fosco e Consolidação	Aspecto Redondo	Pav Mosaico					Central e Periferico	Dois ou Mais Lobos	Bilateral	Lobo Sup Dir	Lobo Médio	Lobo Inf Dir	Lobo Sup Esq	Lobo Inf Esq	YES	1	1 - Leve (<25%)	Vidro Fosco e Consolidação	#REF!	Aspecto Redondo	Pav Mosaico	Sinal do Halo Reverso				Periferico	Dois ou Mais Lobos	Bilateral	Lobo Sup Dir	Lobo Médio	Lobo Inf Dir	Lobo Sup Esq	Lobo Inf Esq	YES	YES	NO	NO	NO	NO	NO	NO
2	61-70	2	2020-03-22	POSITIVE FOR COVID	NO		1 - Leve (<25%)	Vidro Fosco e Consolidação	Aspecto Redondo	Pav Mosaico	Sinal do Halo Reverso	Espessamento Brônquico			Periferico	Dois ou Mais Lobos	Bilateral	Lobo Sup Dir		Lobo Inf Dir	Lobo Sup Esq	Lobo Inf Esq					#REF!								Unico Lobo	Unilateral						NO	YES	YES	YES	NO	NO	NO	YES
3	>80	1	2020-03-18	POSITIVE FOR COVID	NO		1 - Leve (<25%)	Vidro Fosco e Consolidação	Aspecto Redondo	Pav Mosaico					Periferico	Dois ou Mais Lobos	Bilateral		Lobo Médio	Lobo Inf Dir	Lobo Sup Esq	Lobo Inf Esq	YES		1 - Leve (<25%)	Vidro Fosco e Consolidação	#REF!	Aspecto Redondo	Pav Mosaico					Periferico	Dois ou Mais Lobos	Bilateral		Lobo Médio	Lobo Inf Dir	Lobo Sup Esq	Lobo Inf Esq	NO	YES	YES	NO	NO	NO	NO	YES
4	>80	2	2020-03-02	POSITIVE FOR COVID	YES	1	2 - Moderado (25-50%)	Vidro Fosco e Consolidação	Aspecto Redondo	Pav Mosaico					Central e Periferico	Dois ou Mais Lobos	Bilateral	Lobo Sup Dir	Lobo Médio	Lobo Inf Dir	Lobo Sup Esq	Lobo Inf Esq	YES	1	2 - Moderado (25-50%)	Vidro Fosco e Consolidação	#REF!	Aspecto Redondo	Pav Mosaico					Central e Periferico	Dois ou Mais Lobos	Bilateral	Lobo Sup Dir	Lobo Médio	Lobo Inf Dir	Lobo Sup Esq	Lobo Inf Esq	NO	NO	NO	NO	NO	NO	NO	NO
5	>80	2	2020-04-03	POSITIVE FOR COVID	NO	1	1 - Leve (<25%)	Vidro Fosco Pura		Pav Mosaico		Espessamento Brônquico	Derrame Pleural	LinfadeNOmegalia	Periferico	Unico Lobo	Unilateral	Lobo Sup Dir						1			#REF!								Unico Lobo	Unilateral						YES	YES	NO	NO	NO	NO	NO	YES
6	>80	2	2020-03-16	POSITIVE FOR COVID	YES		1 - Leve (<25%)	Vidro Fosco e Consolidação		Pav Mosaico		Espessamento Brônquico			Central e Periferico	Dois ou Mais Lobos	Bilateral	Lobo Sup Dir	Lobo Médio	Lobo Inf Dir	Lobo Sup Esq	Lobo Inf Esq	Duvidosa		1 - Leve (<25%)	Vidro Fosco e Consolidação	#REF!		Pav Mosaico		Espessamento Brônquico	Derrame Pleural	LinfadeNOmegalia	Central e Periferico	Unico Lobo	Unilateral						NO	YES	NO	NO	NO	NO	NO	NO
7	61-70	2	2020-03-28	POSITIVE FOR COVID	NO	0	Grave (>50%)	Vidro Fosco Pura		Pav Mosaico	Sinal do Halo Reverso	Espessamento Brônquico			Central e Periferico	Dois ou Mais Lobos	Bilateral	Lobo Sup Dir	Lobo Médio	Lobo Inf Dir	Lobo Sup Esq	Lobo Inf Esq		0			#REF!								Unico Lobo	Unilateral						YES	NO	YES	NO	NO	NO	NO	YES
8	61-70	2	2020-03-23	POSITIVE FOR COVID	NO	4	2 - Moderado (25-50%)	Vidro Fosco e Consolidação	Aspecto Redondo	Pav Mosaico	Sinal do Halo Reverso	Espessamento Brônquico	Derrame Pleural		Central e Periferico	Dois ou Mais Lobos	Bilateral	Lobo Sup Dir	Lobo Médio	Lobo Inf Dir	Lobo Sup Esq	Lobo Inf Esq		4			#REF!								Unico Lobo	Unilateral						YES	YES	NO	NO	YES	NO	NO	NO
9	<50	1	2020-03-30	POSITIVE FOR COVID	NO	0	NOrmal	Ausência de Opacidades							Ausência de Opacidades									0			#REF!								Unico Lobo	Unilateral						YES	YES	NO	YES	NO	YES	NO	NO
10	<50	1	2020-03-22	POSITIVE FOR COVID	NO	3	1 - Leve (<25%)	Vidro Fosco e Consolidação	Aspecto Redondo	Pav Mosaico	Sinal do Halo Reverso	Espessamento Brônquico	Derrame Pleural		Central e Periferico	Dois ou Mais Lobos	Unilateral				Lobo Sup Esq	Lobo Inf Esq	Duvidosa	3	1 - Leve (<25%)	Vidro Fosco e Consolidação	#REF!	Aspecto Redondo	Pav Mosaico					Central e Periferico	Unico Lobo	Unilateral				Lobo Sup Esq	Lobo Inf Esq	YES	YES	YES	NO	NO	NO	NO	NO
11	71-80	2	2020-03-30	POSITIVE FOR COVID	NO	5	2 - Moderado (25-50%)	Vidro Fosco e Consolidação		Pav Mosaico		Espessamento Brônquico	Derrame Pleural		Central e Periferico	Dois ou Mais Lobos	Bilateral	Lobo Sup Dir	Lobo Médio	Lobo Inf Dir	Lobo Sup Esq	Lobo Inf Esq		5			#REF!								Unico Lobo	Unilateral						YES	NO	YES	NO	NO	NO	NO	NO
12	71-80	2	2020-03-13	POSITIVE FOR COVID	NO	3	1 - Leve (<25%)	Vidro Fosco e Consolidação	Aspecto Redondo	Pav Mosaico	Sinal do Halo Reverso				Periferico	Dois ou Mais Lobos	Bilateral	Lobo Sup Dir	Lobo Médio	Lobo Inf Dir	Lobo Sup Esq	Lobo Inf Esq	YES	3	1 - Leve (<25%)	Vidro Fosco e Consolidação	#REF!	Aspecto Redondo	Pav Mosaico	Sinal do Halo Reverso				Periferico	Dois ou Mais Lobos	Bilateral	Lobo Sup Dir	Lobo Médio	Lobo Inf Dir	Lobo Sup Esq	Lobo Inf Esq	YES	YES	YES	NO	NO	NO	NO	NO
13	>80	2	2020-04-02	POSITIVE FOR COVID	YES		1 - Leve (<25%)	Vidro Fosco Pura		Pav Mosaico		Espessamento Brônquico			Central e Periferico	Dois ou Mais Lobos	Bilateral	Lobo Sup Dir	Lobo Médio	Lobo Inf Dir	Lobo Sup Esq	Lobo Inf Esq					#REF!								Unico Lobo	Unilateral						YES	YES	NO	NO	NO	NO	NO	NO
14	<50	1	2020-03-31	POSITIVE FOR COVID	NO	3	1 - Leve (<25%)	Vidro Fosco e Consolidação		Pav Mosaico					Periferico	Unico Lobo	Unilateral					Lobo Inf Esq		3			#REF!								Unico Lobo	Unilateral						YES	YES	YES	NO	NO	NO	NO	NO
15	61-70	1	2020-03-21	POSITIVE FOR COVID	NO	0	1 - Leve (<25%)	Vidro Fosco e Consolidação		Pav Mosaico		Espessamento Brônquico			Central e Periferico	Dois ou Mais Lobos	Bilateral	Lobo Sup Dir		Lobo Inf Dir		Lobo Inf Esq		0			#REF!								Unico Lobo	Unilateral						NO	YES	YES	NO	NO	NO	YES	NO
16	61-70	2	2020-03-20	POSITIVE FOR COVID	NO		Grave (>50%)	Vidro Fosco Pura	Aspecto Redondo	Pav Mosaico		Espessamento Brônquico			Central e Periferico	Dois ou Mais Lobos	Bilateral	Lobo Sup Dir	Lobo Médio	Lobo Inf Dir	Lobo Sup Esq	Lobo Inf Esq					#REF!								Unico Lobo	Unilateral						NO	YES	YES	YES	NO	NO	NO	YES
17	71-80	2	2020-04-01	POSITIVE FOR COVID	NO	1	1 - Leve (<25%)	Vidro Fosco Pura	Aspecto Redondo	Pav Mosaico		Espessamento Brônquico			Periferico	Dois ou Mais Lobos	Bilateral	Lobo Sup Dir	Lobo Médio	Lobo Inf Dir	Lobo Sup Esq	Lobo Inf Esq		1			#REF!								Unico Lobo	Unilateral						YES	NO	NO	YES	NO	NO	NO	YES
18	>80	1	2020-03-31	POSITIVE FOR COVID	YES	1	1 - Leve (<25%)	Vidro Fosco e Consolidação	Aspecto Redondo	Pav Mosaico		Espessamento Brônquico			Periferico	Dois ou Mais Lobos	Bilateral	Lobo Sup Dir	Lobo Médio	Lobo Inf Dir	Lobo Sup Esq	Lobo Inf Esq		1			#REF!								Unico Lobo	Unilateral						YES	NO	NO	NO	NO	NO	NO	NO
19	61-70	2	2020-03-05	POSITIVE FOR COVID	NO		1 - Leve (<25%)	Vidro Fosco Pura	Aspecto Redondo	Pav Mosaico	Sinal do Halo Reverso	Espessamento Brônquico			Periferico	Dois ou Mais Lobos	Bilateral	Lobo Sup Dir	Lobo Médio	Lobo Inf Dir	Lobo Sup Esq	Lobo Inf Esq	YES		1 - Leve (<25%)	Vidro Fosco Pura	#REF!	Aspecto Redondo	Pav Mosaico	Sinal do Halo Reverso	Espessamento Brônquico			Periferico	Dois ou Mais Lobos	Bilateral	Lobo Sup Dir	Lobo Médio	Lobo Inf Dir	Lobo Sup Esq	Lobo Inf Esq	YES	NO	YES	YES	NO	NO	YES	NO
20	61-70	2	2020-03-25	POSITIVE FOR COVID	NO	4	2 - Moderado (25-50%)	Vidro Fosco e Consolidação	Aspecto Redondo	Pav Mosaico	Sinal do Halo Reverso	Espessamento Brônquico			Central e Periferico	Dois ou Mais Lobos	Bilateral	Lobo Sup Dir	Lobo Médio	Lobo Inf Dir	Lobo Sup Esq	Lobo Inf Esq		4			#REF!								Unico Lobo	Unilateral						YES	YES	NO	NO	NO	NO	YES	NO
21	>80	2	2020-03-24	POSITIVE FOR COVID	NO		1 - Leve (<25%)	Vidro Fosco e Consolidação		Pav Mosaico	Sinal do Halo Reverso	Espessamento Brônquico			Central e Periferico	Dois ou Mais Lobos	Bilateral	Lobo Sup Dir	Lobo Médio	Lobo Inf Dir	Lobo Sup Esq	Lobo Inf Esq					#REF!								Unico Lobo	Unilateral						NO	NO	NO	NO	NO	NO	YES	YES
22	<50	2	2020-03-25	POSITIVE FOR COVID	NO		1 - Leve (<25%)	Vidro Fosco Pura	Aspecto Redondo	Pav Mosaico					Periferico	Dois ou Mais Lobos	Bilateral	Lobo Sup Dir	Lobo Médio	Lobo Inf Dir	Lobo Sup Esq	Lobo Inf Esq					#REF!								Unico Lobo	Unilateral						NO	YES	YES	NO	YES	NO	NO	NO
23	<50	1	2020-03-21	POSITIVE FOR COVID	NO	0	1 - Leve (<25%)	Vidro Fosco Pura	Aspecto Redondo						Periferico	Dois ou Mais Lobos	Bilateral	Lobo Sup Dir			Lobo Sup Esq	Lobo Inf Esq		0			#REF!								Unico Lobo	Unilateral						NO	NO	YES	NO	NO	NO	NO	NO
24	<50	1	2020-03-27	POSITIVE FOR COVID	NO	0	1 - Leve (<25%)	Vidro Fosco e Consolidação	Aspecto Redondo	Pav Mosaico		Espessamento Brônquico			Central e Periferico	Unico Lobo	Unilateral			Lobo Inf Dir				0			#REF!								Unico Lobo	Unilateral						YES	YES	YES	NO	NO	YES	NO	NO
25	51-60	2	2020-03-25	POSITIVE FOR COVID	NO	1	2 - Moderado (25-50%)	Vidro Fosco e Consolidação	Aspecto Redondo	Pav Mosaico		Espessamento Brônquico	Derrame Pleural		Central e Periferico	Dois ou Mais Lobos	Bilateral	Lobo Sup Dir	Lobo Médio		Lobo Sup Esq	Lobo Inf Esq	Duvidosa	1	2 - Moderado (25-50%)	Vidro Fosco e Consolidação	#REF!	Aspecto Redondo	Pav Mosaico		Espessamento Brônquico	Derrame Pleural		Central e Periferico	Dois ou Mais Lobos	Bilateral	Lobo Sup Dir	Lobo Médio	Lobo Inf Dir	Lobo Sup Esq	Lobo Inf Esq	NO	NO	NO	NO	NO	NO	NO	NO
26	71-80	2	2020-03-10	POSITIVE FOR COVID	YES	1	2 - Moderado (25-50%)	Vidro Fosco Pura	Aspecto Redondo	Pav Mosaico		Espessamento Brônquico			Central e Periferico	Dois ou Mais Lobos	Bilateral	Lobo Sup Dir	Lobo Médio	Lobo Inf Dir	Lobo Sup Esq	Lobo Inf Esq	YES	1	2 - Moderado (25-50%)	Vidro Fosco Pura	#REF!	Aspecto Redondo	Pav Mosaico		Espessamento Brônquico			Central e Periferico	Dois ou Mais Lobos	Bilateral	Lobo Sup Dir	Lobo Médio	Lobo Inf Dir	Lobo Sup Esq	Lobo Inf Esq	YES	YES	NO	NO	NO	NO	NO	YES
27	71-80	2	2020-04-02	POSITIVE FOR COVID	NO	0	Grave (>50%)	Vidro Fosco Pura		Pav Mosaico	Sinal do Halo Reverso	Espessamento Brônquico			Central e Periferico	Dois ou Mais Lobos	Bilateral	Lobo Sup Dir	Lobo Médio	Lobo Inf Dir	Lobo Sup Esq	Lobo Inf Esq		0			#REF!								Unico Lobo	Unilateral						YES	YES	NO	NO	NO	NO	NO	NO
28	61-70	2	2020-03-23	POSITIVE FOR COVID	NO	6	2 - Moderado (25-50%)	Vidro Fosco Pura	Aspecto Redondo	Pav Mosaico		Espessamento Brônquico			Central e Periferico	Dois ou Mais Lobos	Bilateral	Lobo Sup Dir	Lobo Médio	Lobo Inf Dir		Lobo Inf Esq		6			#REF!								Unico Lobo	Unilateral						NO	YES	YES	NO	NO	NO	NO	NO
29	<50	1	2020-03-24	POSITIVE FOR COVID	NO		1 - Leve (<25%)	Vidro Fosco e Consolidação	Aspecto Redondo	Pav Mosaico					Periferico	Unico Lobo	Unilateral			Lobo Inf Dir							#REF!								Unico Lobo	Unilateral						YES	YES	YES	NO	NO	NO	NO	NO
30	<50	2	2020-03-04	POSITIVE FOR COVID	NO	3	1 - Leve (<25%)	Vidro Fosco e Consolidação	Aspecto Redondo	Pav Mosaico	Sinal do Halo Reverso				Periferico	Dois ou Mais Lobos	Bilateral	Lobo Sup Dir	Lobo Médio	Lobo Inf Dir	Lobo Sup Esq	Lobo Inf Esq	YES	3	1 - Leve (<25%)	Vidro Fosco e Consolidação	#REF!	Aspecto Redondo	Pav Mosaico	Sinal do Halo Reverso				Periferico	Dois ou Mais Lobos	Bilateral	Lobo Sup Dir	Lobo Médio	Lobo Inf Dir	Lobo Sup Esq	Lobo Inf Esq	YES	YES	NO	NO	NO	NO	NO	NO
31	71-80	2	2020-03-23	POSITIVE FOR COVID	YES		1 - Leve (<25%)	Vidro Fosco Pura	Aspecto Redondo	Pav Mosaico	Sinal do Halo Reverso	Espessamento Brônquico			Central e Periferico	Dois ou Mais Lobos	Bilateral	Lobo Sup Dir	Lobo Médio	Lobo Inf Dir	Lobo Sup Esq	Lobo Inf Esq					#REF!								Unico Lobo	Unilateral						YES	NO	YES	NO	NO	NO	NO	NO
32	71-80	2	2020-03-20	POSITIVE FOR COVID	YES	6	2 - Moderado (25-50%)	Vidro Fosco Pura	Aspecto Redondo	Pav Mosaico		Espessamento Brônquico	Derrame Pleural		Central e Periferico	Dois ou Mais Lobos	Bilateral	Lobo Sup Dir	Lobo Médio	Lobo Inf Dir	Lobo Sup Esq	Lobo Inf Esq	YES	6	2 - Moderado (25-50%)	Vidro Fosco Pura	#REF!	Aspecto Redondo	Pav Mosaico		Espessamento Brônquico	Derrame Pleural		Central e Periferico	Dois ou Mais Lobos	Bilateral	Lobo Sup Dir	Lobo Médio	Lobo Inf Dir	Lobo Sup Esq	Lobo Inf Esq	YES	NO	NO	NO	NO	NO	NO	NO
33	>80	2	2020-03-24	POSITIVE FOR COVID	NO	0	1 - Leve (<25%)	Vidro Fosco e Consolidação	Aspecto Redondo	Pav Mosaico		Espessamento Brônquico			Central e Periferico	Dois ou Mais Lobos	Bilateral	Lobo Sup Dir	Lobo Médio		Lobo Sup Esq			0			#REF!								Unico Lobo	Unilateral						YES	YES	NO	NO	NO	NO	NO	NO
34	>80	2	2020-03-13	POSITIVE FOR COVID	NO	1	1 - Leve (<25%)	Vidro Fosco e Consolidação		Pav Mosaico		Espessamento Brônquico			Periferico	Dois ou Mais Lobos	Bilateral	Lobo Sup Dir	Lobo Médio	Lobo Inf Dir	Lobo Sup Esq	Lobo Inf Esq	YES	1	1 - Leve (<25%)	Vidro Fosco e Consolidação	#REF!		Pav Mosaico		Espessamento Brônquico			Periferico	Dois ou Mais Lobos	Bilateral	Lobo Sup Dir	Lobo Médio	Lobo Inf Dir	Lobo Sup Esq	Lobo Inf Esq	YES	YES	YES	NO	NO	NO	NO	NO
35	71-80	3	2020-03-09	POSITIVE FOR COVID	YES	4	Grave (>50%)	Vidro Fosco e Consolidação	Aspecto Redondo	Pav Mosaico		Espessamento Brônquico	Derrame Pleural		Central e Periferico	Dois ou Mais Lobos	Bilateral	Lobo Sup Dir	Lobo Médio	Lobo Inf Dir	Lobo Sup Esq	Lobo Inf Esq		4			#REF!								Unico Lobo	Unilateral						YES	NO	NO	NO	NO	NO	NO	NO
36	>80	2	2020-04-02	POSITIVE FOR COVID	NO		2 - Moderado (25-50%)	Vidro Fosco Pura		Pav Mosaico		Espessamento Brônquico			Periferico	Dois ou Mais Lobos	Bilateral	Lobo Sup Dir	Lobo Médio	Lobo Inf Dir	Lobo Sup Esq	Lobo Inf Esq					#REF!								Unico Lobo	Unilateral						NO	NO	YES	NO	NO	NO	YES	YES
37	>80	2	2020-03-31	POSITIVE FOR COVID	YES		Grave (>50%)	Vidro Fosco Pura		Pav Mosaico		Espessamento Brônquico			Central e Periferico	Dois ou Mais Lobos	Bilateral	Lobo Sup Dir	Lobo Médio	Lobo Inf Dir	Lobo Sup Esq	Lobo Inf Esq					#REF!								Unico Lobo	Unilateral						YES	YES	NO	NO	NO	NO	NO	NO
38	51-60	2	2020-03-17	POSITIVE FOR COVID	NO		1 - Leve (<25%)	Vidro Fosco Pura	Aspecto Redondo						Periferico	Dois ou Mais Lobos	Bilateral	Lobo Sup Dir			Lobo Sup Esq	Lobo Inf Esq					#REF!								Unico Lobo	Unilateral						YES	NO	YES	NO	YES	NO	NO	NO
39	<50	1	2020-04-01	POSITIVE FOR COVID	NO	0	1 - Leve (<25%)	Vidro Fosco Pura	Aspecto Redondo	Pav Mosaico		Espessamento Brônquico			Central e Periferico	Dois ou Mais Lobos	Bilateral	Lobo Sup Dir		Lobo Inf Dir	Lobo Sup Esq	Lobo Inf Esq		0			#REF!								Unico Lobo	Unilateral						NO	NO	YES	NO	YES	YES	NO	YES
40	<50	1	2020-03-26	POSITIVE FOR COVID	NO	0	1 - Leve (<25%)	Vidro Fosco e Consolidação	Aspecto Redondo			Espessamento Brônquico			Periferico	Unico Lobo	Unilateral			Lobo Inf Dir				0			#REF!								Unico Lobo	Unilateral						YES	NO	NO	NO	NO	NO	NO	NO
41	<50	1	2020-03-10	POSITIVE FOR COVID	NO	0	1 - Leve (<25%)	Vidro Fosco Pura	Aspecto Redondo	Pav Mosaico					Periferico	Dois ou Mais Lobos	Bilateral	Lobo Sup Dir	Lobo Médio	Lobo Inf Dir	Lobo Sup Esq	Lobo Inf Esq	YES	0	1 - Leve (<25%)	Vidro Fosco Pura	#REF!	Aspecto Redondo	Pav Mosaico					Periferico	Dois ou Mais Lobos	Bilateral	Lobo Sup Dir	Lobo Médio	Lobo Inf Dir	Lobo Sup Esq	Lobo Inf Esq	YES	NO	YES	NO	NO	NO	NO	NO
42	<50	1	2020-03-30	POSITIVE FOR COVID	NO		Não Se Aplica	Ausência de Opacidades				Espessamento Brônquico			Ausência de Opacidades												#REF!								Unico Lobo	Unilateral						NO	NO	NO	NO	NO	NO	NO	NO
43	<50	1	2020-03-09	POSITIVE FOR COVID	NO	0	1 - Leve (<25%)	Vidro Fosco e Consolidação	Aspecto Redondo	Pav Mosaico	Sinal do Halo Reverso				Periferico	Dois ou Mais Lobos	Bilateral	Lobo Sup Dir	Lobo Médio	Lobo Inf Dir	Lobo Sup Esq	Lobo Inf Esq	YES	0	1 - Leve (<25%)	Vidro Fosco Pura	#REF!	Aspecto Redondo	Pav Mosaico	Sinal do Halo Reverso				Periferico	Dois ou Mais Lobos	Bilateral	Lobo Sup Dir	Lobo Médio	Lobo Inf Dir	Lobo Sup Esq	Lobo Inf Esq	YES	YES	YES	NO	NO	NO	NO	NO
44	<50	1	2020-03-28	POSITIVE FOR COVID	NO	0	1 - Leve (<25%)	Vidro Fosco Pura	Aspecto Redondo	Pav Mosaico		Espessamento Brônquico			Central e Periferico	Dois ou Mais Lobos	Bilateral		Lobo Médio	Lobo Inf Dir	Lobo Sup Esq	Lobo Inf Esq		0			#REF!								Unico Lobo	Unilateral						YES	NO	YES	NO	NO	NO	NO	NO
45	<50	1	2020-04-04	POSITIVE FOR COVID	NO	0	Não Se Aplica	Ausência de Opacidades				Espessamento Brônquico			Ausência de Opacidades									0			#REF!								Unico Lobo	Unilateral						NO	YES	NO	NO	YES	NO	NO	NO
46	<50	3	2020-03-03	POSITIVE FOR COVID	YES	4	2 - Moderado (25-50%)	Vidro Fosco e Consolidação	Aspecto Redondo	Pav Mosaico		Espessamento Brônquico			Central e Periferico	Dois ou Mais Lobos	Bilateral	Lobo Sup Dir	Lobo Médio	Lobo Inf Dir	Lobo Sup Esq	Lobo Inf Esq	YES	4	2 - Moderado (25-50%)	Vidro Fosco e Consolidação	#REF!	Aspecto Redondo	Pav Mosaico		Espessamento Brônquico			Central e Periferico	Dois ou Mais Lobos	Bilateral	Lobo Sup Dir	Lobo Médio	Lobo Inf Dir	Lobo Sup Esq	Lobo Inf Esq	YES	YES	YES	YES	NO	NO	NO	NO
47	<50	2	2020-03-07	POSITIVE FOR COVID	NO	5	1 - Leve (<25%)	Vidro Fosco e Consolidação	Aspecto Redondo	Pav Mosaico		Espessamento Brônquico			Central e Periferico	Dois ou Mais Lobos	Bilateral	Lobo Sup Dir	Lobo Médio		Lobo Sup Esq	Lobo Inf Esq	YES	5	1 - Leve (<25%)	Vidro Fosco e Consolidação	#REF!	Aspecto Redondo	Pav Mosaico		Espessamento Brônquico			Central e Periferico	Dois ou Mais Lobos	Bilateral	Lobo Sup Dir	Lobo Médio		Lobo Sup Esq	Lobo Inf Esq	NO	YES	YES	NO	YES	NO	NO	NO
48	<50	1	2020-03-27	POSITIVE FOR COVID	NO	0	1 - Leve (<25%)	Vidro Fosco e Consolidação	Aspecto Redondo	Pav Mosaico	Sinal do Halo Reverso				Periferico	Dois ou Mais Lobos	Bilateral	Lobo Sup Dir	Lobo Médio	Lobo Inf Dir	Lobo Sup Esq	Lobo Inf Esq		0			#REF!								Unico Lobo	Unilateral						NO	NO	NO	NO	NO	NO	NO	NO
49	<50	1	2020-03-18	POSITIVE FOR COVID	NO	3	1 - Leve (<25%)	Vidro Fosco Pura	Aspecto Redondo	Pav Mosaico		Espessamento Brônquico			Periferico	Dois ou Mais Lobos	Bilateral	Lobo Sup Dir	Lobo Médio	Lobo Inf Dir	Lobo Sup Esq	Lobo Inf Esq		3			#REF!								Unico Lobo	Unilateral						YES	YES	NO	YES	YES	NO	NO	NO
50	<50	1	2020-03-28	POSITIVE FOR COVID	NO	0	1 - Leve (<25%)	Vidro Fosco Pura	Aspecto Redondo						Periferico	Unico Lobo	Unilateral			Lobo Inf Dir				0			#REF!								Unico Lobo	Unilateral						NO	YES	NO	NO	NO	NO	NO	YES
51	>80	2	2020-03-13	POSITIVE FOR COVID	NO	1	1 - Leve (<25%)	Vidro Fosco Pura		Pav Mosaico	Sinal do Halo Reverso	Espessamento Brônquico			Central e Periferico	Dois ou Mais Lobos	Bilateral	Lobo Sup Dir	Lobo Médio	Lobo Inf Dir	Lobo Sup Esq	Lobo Inf Esq	YES	1	1 - Leve (<25%)	Vidro Fosco Pura	#REF!		Pav Mosaico	Sinal do Halo Reverso	Espessamento Brônquico			Central e Periferico	Dois ou Mais Lobos	Bilateral	Lobo Sup Dir	Lobo Médio	Lobo Inf Dir	Lobo Sup Esq	Lobo Inf Esq	YES	YES	NO	YES	NO	NO	YES	YES
52	<50	1	2020-03-10	POSITIVE FOR COVID	NO		1 - Leve (<25%)	Vidro Fosco Pura	Aspecto Redondo	Pav Mosaico					Periferico	Dois ou Mais Lobos	Bilateral	Lobo Sup Dir	Lobo Médio	Lobo Inf Dir	Lobo Sup Esq		YES		1 - Leve (<25%)	Vidro Fosco Pura	#REF!	Aspecto Redondo	Pav Mosaico					Periferico	Dois ou Mais Lobos	Bilateral	Lobo Sup Dir	Lobo Médio	Lobo Inf Dir	Lobo Sup Esq		NO	YES	YES	NO	YES	YES	NO	NO
53	<50	1	2020-03-29	POSITIVE FOR COVID	NO		1 - Leve (<25%)	Vidro Fosco Pura	Aspecto Redondo	Pav Mosaico					Periferico	Unico Lobo	Unilateral				Lobo Sup Esq						#REF!								Unico Lobo	Unilateral						NO	NO	YES	NO	YES	NO	NO	NO
54	>80	3	2020-03-27	POSITIVE FOR COVID	NO		2 - Moderado (25-50%)	Vidro Fosco e Consolidação	Aspecto Redondo	Pav Mosaico	Sinal do Halo Reverso	Espessamento Brônquico			Central e Periferico	Dois ou Mais Lobos	Bilateral	Lobo Sup Dir	Lobo Médio	Lobo Inf Dir	Lobo Sup Esq	Lobo Inf Esq					#REF!								Unico Lobo	Unilateral						NO	YES	YES	YES	NO	NO	NO	YES
55	>80	3	2020-03-25	POSITIVE FOR COVID	YES		Grave (>50%)	Vidro Fosco e Consolidação		Pav Mosaico		Espessamento Brônquico	Derrame Pleural		Central e Periferico	Dois ou Mais Lobos	Bilateral	Lobo Sup Dir	Lobo Médio	Lobo Inf Dir	Lobo Sup Esq	Lobo Inf Esq	Duvidosa		Grave (>50%)	Vidro Fosco e Consolidação	#REF!		Pav Mosaico		Espessamento Brônquico	Derrame Pleural		Central e Periferico	Dois ou Mais Lobos	Bilateral	Lobo Sup Dir	Lobo Médio	Lobo Inf Dir	Lobo Sup Esq	Lobo Inf Esq	YES	NO	YES	NO	NO	NO	NO	NO
56	61-70	2	2020-03-14	POSITIVE FOR COVID	NO	0	1 - Leve (<25%)	Vidro Fosco Pura		Pav Mosaico		Espessamento Brônquico			Periferico	Dois ou Mais Lobos	Bilateral	Lobo Sup Dir		Lobo Inf Dir	Lobo Sup Esq	Lobo Inf Esq	YES	0	1 - Leve (<25%)	Vidro Fosco Pura	#REF!		Pav Mosaico		Espessamento Brônquico			Periferico	Dois ou Mais Lobos	Bilateral	Lobo Sup Dir	Lobo Médio	Lobo Inf Dir	Lobo Sup Esq	Lobo Inf Esq	YES	YES	YES	NO	YES	NO	NO	NO
57	>80	1	2020-04-29	POSITIVE FOR COVID	NO		1 - Leve (<25%)	Vidro Fosco e Consolidação	Aspecto Redondo	Pav Mosaico		Espessamento Brônquico			Central e Periferico	Dois ou Mais Lobos	Bilateral	Lobo Sup Dir	Lobo Médio	Lobo Inf Dir	Lobo Sup Esq	Lobo Inf Esq					#REF!								Unico Lobo	Unilateral						YES	YES	YES	NO	NO	NO	NO	NO
58	>80	2	2020-03-21	POSITIVE FOR COVID	NO	1	1 - Leve (<25%)	Vidro Fosco e Consolidação	Aspecto Redondo	Pav Mosaico		Espessamento Brônquico			Central e Periferico	Dois ou Mais Lobos	Bilateral			Lobo Inf Dir	Lobo Sup Esq	Lobo Inf Esq	YES	1	1 - Leve (<25%)	Vidro Fosco e Consolidação	#REF!	Aspecto Redondo	Pav Mosaico		Espessamento Brônquico			Central e Periferico	Dois ou Mais Lobos	Bilateral			Lobo Inf Dir	Lobo Sup Esq	Lobo Inf Esq	NO	NO	YES	NO	NO	NO	YES	NO
59	71-80	1	2020-03-04	POSITIVE FOR COVID	YES		1 - Leve (<25%)	Vidro Fosco e Consolidação		Pav Mosaico		Espessamento Brônquico	Derrame Pleural		Central e Periferico	Dois ou Mais Lobos	Bilateral	Lobo Sup Dir	Lobo Médio	Lobo Inf Dir	Lobo Sup Esq	Lobo Inf Esq					#REF!								Unico Lobo	Unilateral						NO	NO	YES	NO	NO	NO	NO	YES
60	71-80	1	2020-03-17	POSITIVE FOR COVID	NO	1	1 - Leve (<25%)	Vidro Fosco Pura		Pav Mosaico		Espessamento Brônquico			Periferico	Dois ou Mais Lobos	Bilateral			Lobo Inf Dir		Lobo Inf Esq	YES	1	1 - Leve (<25%)	Vidro Fosco Pura	#REF!		Pav Mosaico		Espessamento Brônquico			Periferico	Unico Lobo	Unilateral			Lobo Inf Dir		Lobo Inf Esq	YES	YES	YES	NO	NO	NO	NO	NO
61	71-80	3	2020-03-28	POSITIVE FOR COVID	NO		1 - Leve (<25%)	Vidro Fosco Pura	Aspecto Redondo	Pav Mosaico		Espessamento Brônquico			Central e Periferico	Dois ou Mais Lobos	Bilateral	Lobo Sup Dir	Lobo Médio	Lobo Inf Dir	Lobo Sup Esq	Lobo Inf Esq					#REF!								Unico Lobo	Unilateral						YES	NO	NO	NO	NO	YES	NO	NO
62	61-70	2	2020-03-21	POSITIVE FOR COVID	YES	1	2 - Moderado (25-50%)	Vidro Fosco Pura	Aspecto Redondo	Pav Mosaico			Derrame Pleural		Central e Periferico	Dois ou Mais Lobos	Bilateral	Lobo Sup Dir		Lobo Inf Dir	Lobo Sup Esq	Lobo Inf Esq		1			#REF!								Unico Lobo	Unilateral						YES	YES	YES	YES	NO	NO	NO	NO
63	>80	3	2020-04-01	POSITIVE FOR COVID	YES		1 - Leve (<25%)	Vidro Fosco Pura	Aspecto Redondo	Pav Mosaico	Sinal do Halo Reverso	Espessamento Brônquico			Central e Periferico	Dois ou Mais Lobos	Bilateral	Lobo Sup Dir	Lobo Médio	Lobo Inf Dir	Lobo Sup Esq	Lobo Inf Esq					#REF!								Unico Lobo	Unilateral						YES	YES	YES	YES	NO	NO	NO	NO
64	71-80	3	2020-03-05	POSITIVE FOR COVID	YES	3	1 - Leve (<25%)	Vidro Fosco Pura		Pav Mosaico		Espessamento Brônquico	Derrame Pleural		Periferico	Dois ou Mais Lobos	Bilateral	Lobo Sup Dir	Lobo Médio	Lobo Inf Dir	Lobo Sup Esq	Lobo Inf Esq	Duvidosa	3	1 - Leve (<25%)	Vidro Fosco Pura	#REF!		Pav Mosaico		Espessamento Brônquico	Derrame Pleural		Periferico	Dois ou Mais Lobos	Bilateral	Lobo Sup Dir	Lobo Médio	Lobo Inf Dir	Lobo Sup Esq	Lobo Inf Esq	YES	YES	YES	NO	NO	NO	NO	NO
65	>80	2	2020-03-28	POSITIVE FOR COVID	NO		1 - Leve (<25%)	Vidro Fosco Pura	Aspecto Redondo	Pav Mosaico		Espessamento Brônquico			Periferico	Dois ou Mais Lobos	Bilateral	Lobo Sup Dir		Lobo Inf Dir	Lobo Sup Esq	Lobo Inf Esq					#REF!								Unico Lobo	Unilateral						YES	YES	YES	NO	NO	YES	NO	NO
66	>80	3	2020-03-24	POSITIVE FOR COVID	NO	1	2 - Moderado (25-50%)	Vidro Fosco Pura	Aspecto Redondo	Pav Mosaico	Sinal do Halo Reverso	Espessamento Brônquico			Periferico	Dois ou Mais Lobos	Bilateral	Lobo Sup Dir	Lobo Médio	Lobo Inf Dir	Lobo Sup Esq	Lobo Inf Esq		1			#REF!								Unico Lobo	Unilateral						YES	NO	YES	NO	NO	NO	YES	NO
67	61-70	2	2020-03-16	POSITIVE FOR COVID	YES	1	2 - Moderado (25-50%)	Vidro Fosco Pura		Pav Mosaico	Sinal do Halo Reverso	Espessamento Brônquico			Central e Periferico	Dois ou Mais Lobos	Bilateral	Lobo Sup Dir	Lobo Médio	Lobo Inf Dir	Lobo Sup Esq	Lobo Inf Esq	YES	1	2 - Moderado (25-50%)	Vidro Fosco Pura	#REF!		Pav Mosaico	Sinal do Halo Reverso				Central e Periferico	Dois ou Mais Lobos	Bilateral	Lobo Sup Dir	Lobo Médio	Lobo Inf Dir	Lobo Sup Esq	Lobo Inf Esq	YES	YES	YES	NO	NO	YES	NO	NO
68	71-80	2	2020-03-16	POSITIVE FOR COVID	NO	1	Grave (>50%)	Vidro Fosco Pura	Aspecto Redondo	Pav Mosaico		Espessamento Brônquico			Central e Periferico	Dois ou Mais Lobos	Bilateral	Lobo Sup Dir	Lobo Médio	Lobo Inf Dir	Lobo Sup Esq	Lobo Inf Esq	YES	1	Grave (>50%)	Vidro Fosco Pura	#REF!	Aspecto Redondo	Pav Mosaico		Espessamento Brônquico			Central e Periferico	Dois ou Mais Lobos	Bilateral	Lobo Sup Dir	Lobo Médio	Lobo Inf Dir	Lobo Sup Esq	Lobo Inf Esq	YES	NO	YES	YES	NO	NO	NO	NO
69	61-70	2	2020-03-05	POSITIVE FOR COVID	NO	1	Grave (>50%)	Vidro Fosco Pura		Pav Mosaico	Sinal do Halo Reverso				Central e Periferico	Dois ou Mais Lobos	Bilateral	Lobo Sup Dir	Lobo Médio	Lobo Inf Dir	Lobo Sup Esq	Lobo Inf Esq	YES	1	Grave (>50%)	Vidro Fosco Pura	#REF!		Pav Mosaico					Central e Periferico	Dois ou Mais Lobos	Bilateral	Lobo Sup Dir	Lobo Médio	Lobo Inf Dir	Lobo Sup Esq	Lobo Inf Esq	YES	YES	NO	NO	NO	NO	YES	YES
70	61-70	2	2020-03-13	POSITIVE FOR COVID	NO	0	1 - Leve (<25%)	Vidro Fosco Pura	Aspecto Redondo			Espessamento Brônquico			Central e Periferico	Unico Lobo	Unilateral	Lobo Sup Dir					Duvidosa	0	1 - Leve (<25%)	Vidro Fosco Pura	#REF!	Aspecto Redondo			Espessamento Brônquico			Central e Periferico	Unico Lobo	Unilateral	Lobo Sup Dir					NO	YES	YES	NO	YES	NO	NO	NO
71	61-70	1	2020-03-05	POSITIVE FOR COVID	YES	1	1 - Leve (<25%)	Vidro Fosco Pura	Aspecto Redondo	Pav Mosaico					Central e Periferico	Dois ou Mais Lobos	Bilateral	Lobo Sup Dir	Lobo Médio	Lobo Inf Dir	Lobo Sup Esq	Lobo Inf Esq	YES	1	1 - Leve (<25%)	Vidro Fosco Pura	#REF!	Aspecto Redondo	Pav Mosaico					Central e Periferico	Dois ou Mais Lobos	Bilateral	Lobo Sup Dir	Lobo Médio	Lobo Inf Dir	Lobo Sup Esq	Lobo Inf Esq	NO	NO	YES	NO	YES	NO	NO	YES
72	71-80	1	2020-03-15	POSITIVE FOR COVID	YES	0	1 - Leve (<25%)	Vidro Fosco Pura		Pav Mosaico		Espessamento Brônquico			Central e Periferico	Dois ou Mais Lobos	Bilateral	Lobo Sup Dir	Lobo Médio	Lobo Inf Dir	Lobo Sup Esq	Lobo Inf Esq	YES	0	1 - Leve (<25%)	Vidro Fosco Pura	#REF!		Pav Mosaico		Espessamento Brônquico			Central e Periferico	Dois ou Mais Lobos	Bilateral	Lobo Sup Dir		Lobo Inf Dir	Lobo Sup Esq	Lobo Inf Esq	YES	NO	YES	NO	NO	NO	NO	NO
73	61-70	2	2020-03-16	POSITIVE FOR COVID	NO	0	1 - Leve (<25%)	Vidro Fosco Pura	Aspecto Redondo	Pav Mosaico	Sinal do Halo Reverso	Espessamento Brônquico			Periferico	Dois ou Mais Lobos	Bilateral	Lobo Sup Dir	Lobo Médio	Lobo Inf Dir	Lobo Sup Esq	Lobo Inf Esq	YES	0	1 - Leve (<25%)	Vidro Fosco e Consolidação	#REF!	Aspecto Redondo	Pav Mosaico	Sinal do Halo Reverso	Espessamento Brônquico			Periferico	Dois ou Mais Lobos	Bilateral	Lobo Sup Dir	Lobo Médio	Lobo Inf Dir	Lobo Sup Esq	Lobo Inf Esq	YES	NO	YES	NO	NO	NO	NO	YES
74	71-80	2	2020-03-18	POSITIVE FOR COVID	NO	0	1 - Leve (<25%)	Vidro Fosco e Consolidação	Aspecto Redondo	Pav Mosaico		Espessamento Brônquico			Periferico	Dois ou Mais Lobos	Bilateral	Lobo Sup Dir			Lobo Sup Esq			0			#REF!								Unico Lobo	Unilateral						YES	NO	YES	NO	NO	NO	NO	NO
75	>80	1	2020-03-17	POSITIVE FOR COVID	YES	1	2 - Moderado (25-50%)	Vidro Fosco Pura		Pav Mosaico		Espessamento Brônquico			Central e Periferico	Dois ou Mais Lobos	Bilateral	Lobo Sup Dir	Lobo Médio	Lobo Inf Dir	Lobo Sup Esq	Lobo Inf Esq	YES	1	2 - Moderado (25-50%)	Vidro Fosco Pura	#REF!		Pav Mosaico		Espessamento Brônquico			Central e Periferico	Dois ou Mais Lobos	Bilateral	Lobo Sup Dir	Lobo Médio	Lobo Inf Dir	Lobo Sup Esq	Lobo Inf Esq	YES	YES	YES	NO	NO	NO	NO	NO
76	71-80	2	2020-03-15	POSITIVE FOR COVID	NO	2	1 - Leve (<25%)	Vidro Fosco Pura		Pav Mosaico		Espessamento Brônquico			Periferico	Dois ou Mais Lobos	Bilateral	Lobo Sup Dir	Lobo Médio	Lobo Inf Dir	Lobo Sup Esq	Lobo Inf Esq	YES	2	1 - Leve (<25%)	Vidro Fosco Pura	#REF!		Pav Mosaico		Espessamento Brônquico			Periferico	Dois ou Mais Lobos	Bilateral	Lobo Sup Dir	Lobo Médio	Lobo Inf Dir	Lobo Sup Esq	Lobo Inf Esq	YES	YES	YES	NO	NO	NO	NO	NO
77	61-70	2	2020-03-16	POSITIVE FOR COVID	NO	0	2 - Moderado (25-50%)	Vidro Fosco e Consolidação	Aspecto Redondo	Pav Mosaico		Espessamento Brônquico			Central e Periferico	Dois ou Mais Lobos	Bilateral	Lobo Sup Dir	Lobo Médio	Lobo Inf Dir	Lobo Sup Esq	Lobo Inf Esq		0			#REF!								Unico Lobo	Unilateral						NO	NO	YES	YES	NO	NO	YES	NO
78	71-80	2	2020-03-15	POSITIVE FOR COVID	NO		2 - Moderado (25-50%)	Vidro Fosco Pura	Aspecto Redondo	Pav Mosaico	Sinal do Halo Reverso	Espessamento Brônquico			Central e Periferico	Dois ou Mais Lobos	Bilateral	Lobo Sup Dir	Lobo Médio	Lobo Inf Dir	Lobo Sup Esq	Lobo Inf Esq					#REF!								Unico Lobo	Unilateral						YES	NO	YES	NO	NO	NO	NO	NO
79	61-70	2	2020-03-26	POSITIVE FOR COVID	YES	0	Grave (>50%)	Vidro Fosco Pura	Aspecto Redondo	Pav Mosaico					Central e Periferico	Dois ou Mais Lobos	Bilateral	Lobo Sup Dir	Lobo Médio	Lobo Inf Dir	Lobo Sup Esq	Lobo Inf Esq		0			#REF!								Unico Lobo	Unilateral						YES	YES	NO	NO	NO	NO	NO	NO
80	71-80	2	2020-03-14	POSITIVE FOR COVID	YES	2	2 - Moderado (25-50%)	Vidro Fosco e Consolidação	Aspecto Redondo	Pav Mosaico					Central e Periferico	Dois ou Mais Lobos	Bilateral	Lobo Sup Dir	Lobo Médio	Lobo Inf Dir	Lobo Sup Esq	Lobo Inf Esq	YES	2	1 - Leve (<25%)	Vidro Fosco e Consolidação	#REF!	Aspecto Redondo	Pav Mosaico		Espessamento Brônquico			Central e Periferico	Dois ou Mais Lobos	Bilateral	Lobo Sup Dir	Lobo Médio	Lobo Inf Dir	Lobo Sup Esq	Lobo Inf Esq	NO	YES	YES	NO	NO	NO	NO	NO
81	71-80	3	2020-03-16	POSITIVE FOR COVID	YES	5	Grave (>50%)	Vidro Fosco e Consolidação		Pav Mosaico		Espessamento Brônquico			Central e Periferico	Dois ou Mais Lobos	Bilateral	Lobo Sup Dir	Lobo Médio	Lobo Inf Dir	Lobo Sup Esq		YES	5	Grave (>50%)	Vidro Fosco e Consolidação	#REF!		Pav Mosaico		Espessamento Brônquico	Derrame Pleural		Central e Periferico	Dois ou Mais Lobos	Bilateral	Lobo Sup Dir	Lobo Médio	Lobo Inf Dir	Lobo Sup Esq	Lobo Inf Esq	YES	YES	YES	YES	NO	NO	NO	NO
82	>80	3	2020-03-31	POSITIVE FOR COVID	YES	1	Grave (>50%)	Vidro Fosco e Consolidação	Aspecto Redondo	Pav Mosaico		Espessamento Brônquico			Central e Periferico	Dois ou Mais Lobos	Bilateral	Lobo Sup Dir	Lobo Médio	Lobo Inf Dir	Lobo Sup Esq	Lobo Inf Esq		1			#REF!								Unico Lobo	Unilateral						NO	NO	NO	NO	NO	YES	NO	YES
83	>80	2	2020-04-03	POSITIVE FOR COVID	NO	1	1 - Leve (<25%)	Vidro Fosco Pura	Aspecto Redondo	Pav Mosaico	Sinal do Halo Reverso	Espessamento Brônquico			Central e Periferico	Dois ou Mais Lobos	Bilateral	Lobo Sup Dir	Lobo Médio	Lobo Inf Dir	Lobo Sup Esq	Lobo Inf Esq		1			#REF!								Unico Lobo	Unilateral						YES	YES	YES	NO	YES	NO	NO	NO
84	61-70	1	2020-03-22	POSITIVE FOR COVID	NO		1 - Leve (<25%)	Vidro Fosco Pura	Aspecto Redondo	Pav Mosaico					Periferico	Dois ou Mais Lobos	Bilateral	Lobo Sup Dir	Lobo Médio	Lobo Inf Dir	Lobo Sup Esq	Lobo Inf Esq	YES		1 - Leve (<25%)	Vidro Fosco Pura	#REF!	Aspecto Redondo	Pav Mosaico					Periferico	Dois ou Mais Lobos	Bilateral	Lobo Sup Dir	Lobo Médio	Lobo Inf Dir	Lobo Sup Esq	Lobo Inf Esq	NO	YES	YES	NO	NO	NO	NO	NO
85	<50	1	2020-03-12	POSITIVE FOR COVID	NO	0	Não Se Aplica	Ausência de Opacidades				Espessamento Brônquico			Ausência de Opacidades								Não	0	Não Se Aplica	Ausência de Opacidades	#REF!				Espessamento Brônquico			Ausência de Opacidades								NO	YES	YES	NO	NO	NO	NO	NO
86	71-80	2	2020-03-13	POSITIVE FOR COVID	YES	1	1 - Leve (<25%)	Vidro Fosco Pura		Pav Mosaico	Sinal do Halo Reverso				Periferico	Dois ou Mais Lobos	Bilateral	Lobo Sup Dir	Lobo Médio	Lobo Inf Dir	Lobo Sup Esq	Lobo Inf Esq	YES	1	1 - Leve (<25%)	Vidro Fosco e Consolidação	#REF!		Pav Mosaico	Sinal do Halo Reverso				Periferico	Dois ou Mais Lobos	Bilateral	Lobo Sup Dir	Lobo Médio	Lobo Inf Dir	Lobo Sup Esq	Lobo Inf Esq	NO	YES	YES	NO	YES	NO	NO	YES
87	51-60	1	2020-03-26	POSITIVE FOR COVID	NO		1 - Leve (<25%)	Vidro Fosco Pura	Aspecto Redondo	Pav Mosaico		Espessamento Brônquico			Periferico	Unico Lobo	Unilateral					Lobo Inf Esq					#REF!								Unico Lobo	Unilateral						YES	NO	YES	YES	NO	NO	NO	NO
88	>80	3	2020-03-25	POSITIVE FOR COVID	NO		1 - Leve (<25%)	Vidro Fosco Pura	Aspecto Redondo			Espessamento Brônquico	Derrame Pleural		Periferico	Dois ou Mais Lobos	Bilateral			Lobo Inf Dir	Lobo Sup Esq						#REF!								Unico Lobo	Unilateral						NO	NO	NO	YES	NO	NO	NO	NO
89	71-80	1	2020-03-29	POSITIVE FOR COVID	NO	3	1 - Leve (<25%)	Vidro Fosco e Consolidação	Aspecto Redondo	Pav Mosaico	Sinal do Halo Reverso	Espessamento Brônquico			Periferico	Dois ou Mais Lobos	Bilateral	Lobo Sup Dir	Lobo Médio	Lobo Inf Dir	Lobo Sup Esq	Lobo Inf Esq		3			#REF!								Unico Lobo	Unilateral						NO	YES	YES	NO	NO	YES	NO	NO
90	<50	2	2020-03-10	POSITIVE FOR COVID	NO	4	2 - Moderado (25-50%)	Vidro Fosco e Consolidação	Aspecto Redondo	Pav Mosaico	Sinal do Halo Reverso	Espessamento Brônquico			Central e Periferico	Dois ou Mais Lobos	Bilateral	Lobo Sup Dir	Lobo Médio	Lobo Inf Dir	Lobo Sup Esq	Lobo Inf Esq	YES	4	2 - Moderado (25-50%)	Vidro Fosco e Consolidação	#REF!	Aspecto Redondo	Pav Mosaico	Sinal do Halo Reverso	Espessamento Brônquico			Central e Periferico	Dois ou Mais Lobos	Bilateral	Lobo Sup Dir	Lobo Médio	Lobo Inf Dir	Lobo Sup Esq	Lobo Inf Esq	YES	NO	YES	NO	NO	NO	NO	NO
91	<50	1	2020-03-29	POSITIVE FOR COVID	NO	0	Não Se Aplica	Ausência de Opacidades				Espessamento Brônquico			Ausência de Opacidades									0			#REF!								Unico Lobo	Unilateral						NO	YES	YES	YES	YES	NO	NO	NO
92	<50	1	2020-04-05	POSITIVE FOR COVID	NO		1 - Leve (<25%)	Vidro Fosco Pura	Aspecto Redondo			Espessamento Brônquico			Periferico	Unico Lobo	Unilateral	Lobo Sup Dir									#REF!								Unico Lobo	Unilateral						NO	YES	NO	NO	NO	NO	NO	NO
93	<50	1	2020-03-29	POSITIVE FOR COVID	NO	0	NOrmal	Ausência de Opacidades							Ausência de Opacidades									0			#REF!								Unico Lobo	Unilateral						NO	YES	YES	YES	YES	NO	NO	NO
94	<50	1	2020-03-13	POSITIVE FOR COVID	NO	0	1 - Leve (<25%)	Vidro Fosco Pura	Aspecto Redondo						Periferico							Lobo Inf Esq	YES	0	1 - Leve (<25%)	Vidro Fosco Pura	#REF!	Aspecto Redondo						Periferico	Unico Lobo	Unilateral					Lobo Inf Esq	NO	NO	NO	NO	NO	YES	NO	NO
95	<50	1	2020-03-07	POSITIVE FOR COVID	NO	0	1 - Leve (<25%)	Vidro Fosco Pura	Aspecto Redondo	Pav Mosaico		Espessamento Brônquico			Periferico	Dois ou Mais Lobos	Bilateral			Lobo Inf Dir	Lobo Sup Esq	Lobo Inf Esq	YES	0	1 - Leve (<25%)	Vidro Fosco Pura	#REF!	Aspecto Redondo			Espessamento Brônquico			Periferico	Dois ou Mais Lobos	Bilateral			Lobo Inf Dir	Lobo Sup Esq	Lobo Inf Esq	YES	NO	YES	YES	NO	NO	NO	NO
96	71-80	3	2020-03-23	POSITIVE FOR COVID	YES	4	Grave (>50%)	Vidro Fosco e Consolidação	Aspecto Redondo	Pav Mosaico		Espessamento Brônquico			Central e Periferico	Dois ou Mais Lobos	Bilateral	Lobo Sup Dir	Lobo Médio	Lobo Inf Dir	Lobo Sup Esq	Lobo Inf Esq		4			#REF!								Unico Lobo	Unilateral						YES	YES	YES	NO	NO	NO	NO	NO
97	61-70	3	2020-03-19	POSITIVE FOR COVID	NO		Grave (>50%)	Vidro Fosco e Consolidação	Aspecto Redondo	Pav Mosaico		Espessamento Brônquico			Central e Periferico	Dois ou Mais Lobos	Bilateral	Lobo Sup Dir	Lobo Médio	Lobo Inf Dir	Lobo Sup Esq	Lobo Inf Esq	YES		Grave (>50%)	Vidro Fosco e Consolidação	#REF!	Aspecto Redondo	Pav Mosaico					Central e Periferico	Dois ou Mais Lobos	Bilateral	Lobo Sup Dir	Lobo Médio	Lobo Inf Dir	Lobo Sup Esq	Lobo Inf Esq	YES	YES	YES	NO	NO	NO	NO	NO
98	61-70	3	2020-03-21	POSITIVE FOR COVID	NO		1 - Leve (<25%)	Vidro Fosco e Consolidação		Pav Mosaico	Sinal do Halo Reverso				Periferico	Dois ou Mais Lobos	Bilateral	Lobo Sup Dir	Lobo Médio	Lobo Inf Dir	Lobo Sup Esq	Lobo Inf Esq					#REF!								Unico Lobo	Unilateral						YES	YES	NO	YES	NO	NO	NO	YES
99	<50	1	2020-03-31	POSITIVE FOR COVID	NO		1 - Leve (<25%)	Vidro Fosco Pura	Aspecto Redondo	Pav Mosaico		Espessamento Brônquico			Periferico	Dois ou Mais Lobos	Bilateral	Lobo Sup Dir	Lobo Médio	Lobo Inf Dir	Lobo Sup Esq	Lobo Inf Esq					#REF!								Unico Lobo	Unilateral						YES	YES	YES	NO	YES	NO	NO	NO
100	>80	1	2020-03-25	POSITIVE FOR COVID	YES		1 - Leve (<25%)	Vidro Fosco e Consolidação	Aspecto Redondo	Pav Mosaico	Sinal do Halo Reverso	Espessamento Brônquico			Central e Periferico	Dois ou Mais Lobos	Bilateral	Lobo Sup Dir	Lobo Médio	Lobo Inf Dir	Lobo Sup Esq	Lobo Inf Esq					#REF!								Unico Lobo	Unilateral						YES	NO	NO	NO	NO	NO	NO	YES
101	71-80	2	2020-04-01	POSITIVE FOR COVID	NO	3	1 - Leve (<25%)	Vidro Fosco Pura	Aspecto Redondo	Pav Mosaico					Periferico	Dois ou Mais Lobos	Bilateral	Lobo Sup Dir	Lobo Médio	Lobo Inf Dir	Lobo Sup Esq			3			#REF!								Unico Lobo	Unilateral						NO	NO	NO	NO	NO	NO	NO	NO
102	>80	3	2020-03-21	POSITIVE FOR COVID	YES		Grave (>50%)	Vidro Fosco e Consolidação		Pav Mosaico		Espessamento Brônquico			Central e Periferico	Dois ou Mais Lobos	Bilateral	Lobo Sup Dir	Lobo Médio	Lobo Inf Dir	Lobo Sup Esq	Lobo Inf Esq					#REF!								Unico Lobo	Unilateral						YES	NO	NO	NO	NO	NO	NO	NO
103	<50	1	2020-04-03	POSITIVE FOR COVID	NO		NOrmal	Ausência de Opacidades							Ausência de Opacidades												#REF!								Unico Lobo	Unilateral						NO	NO	NO	NO	NO	YES	NO	YES
104	>80	2	2020-03-25	POSITIVE FOR COVID	NO		1 - Leve (<25%)	Vidro Fosco Pura	Aspecto Redondo	Pav Mosaico	Sinal do Halo Reverso	Espessamento Brônquico			Periferico	Dois ou Mais Lobos	Bilateral	Lobo Sup Dir	Lobo Médio	Lobo Inf Dir	Lobo Sup Esq	Lobo Inf Esq					#REF!								Unico Lobo	Unilateral						NO	NO	NO	NO	NO	NO	YES	NO
105	71-80	3	2020-03-24	POSITIVE FOR COVID	NO	6	Grave (>50%)	Vidro Fosco Pura		Pav Mosaico		Espessamento Brônquico			Central e Periferico	Dois ou Mais Lobos	Bilateral	Lobo Sup Dir	Lobo Médio	Lobo Inf Dir	Lobo Sup Esq	Lobo Inf Esq		6			#REF!								Unico Lobo	Unilateral						YES	YES	YES	YES	YES	NO	YES	NO
106	>80	3	2020-03-23	POSITIVE FOR COVID	NO	1	Grave (>50%)	Vidro Fosco e Consolidação	Aspecto Redondo	Pav Mosaico		Espessamento Brônquico			Central e Periferico	Dois ou Mais Lobos	Unilateral	Lobo Sup Dir	Lobo Médio					1			#REF!								Unico Lobo	Unilateral						NO	NO	NO	NO	NO	NO	NO	NO
107	71-80	2	2020-03-15	POSITIVE FOR COVID	NO	4	2 - Moderado (25-50%)	Vidro Fosco e Consolidação		Pav Mosaico		Espessamento Brônquico			Central e Periferico	Dois ou Mais Lobos	Bilateral	Lobo Sup Dir	Lobo Médio	Lobo Inf Dir	Lobo Sup Esq	Lobo Inf Esq	YES	4	2 - Moderado (25-50%)	Vidro Fosco e Consolidação	#REF!		Pav Mosaico		Espessamento Brônquico			Central e Periferico	Dois ou Mais Lobos	Bilateral	Lobo Sup Dir	Lobo Médio	Lobo Inf Dir	Lobo Sup Esq	Lobo Inf Esq	YES	YES	YES	NO	NO	NO	NO	NO
108	71-80	2	2020-03-16	POSITIVE FOR COVID	NO	4	1 - Leve (<25%)	Vidro Fosco e Consolidação		Pav Mosaico	Sinal do Halo Reverso	Espessamento Brônquico			Periferico	Dois ou Mais Lobos	Bilateral	Lobo Sup Dir	Lobo Médio	Lobo Inf Dir	Lobo Sup Esq	Lobo Inf Esq		4			#REF!								Unico Lobo	Unilateral						NO	NO	YES	YES	NO	NO	NO	NO
109	61-70	2	2020-03-17	POSITIVE FOR COVID	NO		Grave (>50%)	Vidro Fosco e Consolidação		Pav Mosaico					Central e Periferico	Dois ou Mais Lobos	Bilateral	Lobo Sup Dir	Lobo Médio	Lobo Inf Dir	Lobo Sup Esq	Lobo Inf Esq					#REF!								Unico Lobo	Unilateral						YES	YES	YES	YES	NO	NO	NO	NO
110	51-60	2	2020-03-28	POSITIVE FOR COVID	NO		1 - Leve (<25%)	Vidro Fosco Pura				Espessamento Brônquico			Periferico	Unico Lobo	Bilateral	Lobo Sup Dir			Lobo Sup Esq						#REF!								Unico Lobo	Unilateral						YES	YES	NO	YES	NO	NO	NO	YES
111	51-60	1	2020-03-17	POSITIVE FOR COVID	NO	0	1 - Leve (<25%)	Vidro Fosco Pura	Aspecto Redondo						Periferico	Dois ou Mais Lobos	Bilateral			Lobo Inf Dir			YES	0	1 - Leve (<25%)	Vidro Fosco Pura	#REF!	Aspecto Redondo	Pav Mosaico					Periferico	Unico Lobo	Unilateral			Lobo Inf Dir			NO	YES	NO	NO	NO	NO	NO	NO
112	51-60	2	2020-03-23	POSITIVE FOR COVID	NO		1 - Leve (<25%)	Vidro Fosco Pura	Aspecto Redondo	Pav Mosaico		Espessamento Brônquico			Periferico	Dois ou Mais Lobos	Bilateral	Lobo Sup Dir	Lobo Médio	Lobo Inf Dir	Lobo Sup Esq	Lobo Inf Esq	YES		1 - Leve (<25%)	Vidro Fosco Pura	#REF!	Aspecto Redondo	Pav Mosaico		Espessamento Brônquico			Periferico	Dois ou Mais Lobos	Bilateral	Lobo Sup Dir	Lobo Médio	Lobo Inf Dir	Lobo Sup Esq	Lobo Inf Esq	NO	YES	NO	YES	YES	NO	YES	NO
113	>80	3	2020-03-18	POSITIVE FOR COVID	YES		Grave (>50%)	Vidro Fosco e Consolidação	Aspecto Redondo	Pav Mosaico		Espessamento Brônquico			Central e Periferico	Dois ou Mais Lobos	Bilateral	Lobo Sup Dir	Lobo Médio	Lobo Inf Dir	Lobo Sup Esq	Lobo Inf Esq	YES		Grave (>50%)	Vidro Fosco e Consolidação	#REF!	Aspecto Redondo	Pav Mosaico		Espessamento Brônquico			Central e Periferico	Dois ou Mais Lobos	Bilateral	Lobo Sup Dir	Lobo Médio	Lobo Inf Dir	Lobo Sup Esq	Lobo Inf Esq	YES	YES	NO	NO	NO	NO	NO	NO
114	71-80	2	2020-03-17	POSITIVE FOR COVID	YES		Grave (>50%)	Vidro Fosco Pura	Aspecto Redondo	Pav Mosaico		Espessamento Brônquico			Central e Periferico	Dois ou Mais Lobos	Bilateral	Lobo Sup Dir	Lobo Médio	Lobo Inf Dir	Lobo Sup Esq	Lobo Inf Esq					#REF!								Unico Lobo	Unilateral						YES	YES	YES	YES	NO	NO	NO	NO
115	51-60	2	2020-03-19	POSITIVE FOR COVID	NO	1	Grave (>50%)	Vidro Fosco Pura		Pav Mosaico	Sinal do Halo Reverso	Espessamento Brônquico			Central e Periferico	Dois ou Mais Lobos	Bilateral	Lobo Sup Dir	Lobo Médio	Lobo Inf Dir	Lobo Sup Esq	Lobo Inf Esq	YES	1	Grave (>50%)	Vidro Fosco Pura	#REF!		Pav Mosaico		Espessamento Brônquico			Central e Periferico	Dois ou Mais Lobos	Bilateral	Lobo Sup Dir	Lobo Médio	Lobo Inf Dir	Lobo Sup Esq	Lobo Inf Esq	YES	YES	YES	YES	YES	NO	NO	NO
116	61-70	2	2020-03-25	POSITIVE FOR COVID	NO		1 - Leve (<25%)	Vidro Fosco Pura		Pav Mosaico	Sinal do Halo Reverso	Espessamento Brônquico			Periferico	Dois ou Mais Lobos	Bilateral	Lobo Sup Dir		Lobo Inf Dir	Lobo Sup Esq	Lobo Inf Esq					#REF!								Unico Lobo	Unilateral						YES	NO	YES	YES	NO	NO	NO	NO
117	<50	2	2020-03-17	POSITIVE FOR COVID	NO	4	1 - Leve (<25%)	Vidro Fosco e Consolidação	Aspecto Redondo			Espessamento Brônquico			Central e Periferico	Dois ou Mais Lobos	Bilateral	Lobo Sup Dir	Lobo Médio	Lobo Inf Dir	Lobo Sup Esq	Lobo Inf Esq	YES	4	1 - Leve (<25%)	Vidro Fosco e Consolidação	#REF!	Aspecto Redondo			Espessamento Brônquico			Central e Periferico	Dois ou Mais Lobos	Bilateral	Lobo Sup Dir	Lobo Médio	Lobo Inf Dir	Lobo Sup Esq	Lobo Inf Esq	NO	NO	YES	YES	NO	NO	NO	NO
118	61-70	2	2020-03-10	POSITIVE FOR COVID	NO	0	1 - Leve (<25%)	Vidro Fosco e Consolidação		Pav Mosaico		Espessamento Brônquico			Periferico	Dois ou Mais Lobos	Bilateral	Lobo Sup Dir	Lobo Médio	Lobo Inf Dir	Lobo Sup Esq	Lobo Inf Esq	YES	0	1 - Leve (<25%)	Vidro Fosco Pura	#REF!		Pav Mosaico		Espessamento Brônquico			Periferico	Dois ou Mais Lobos	Bilateral	Lobo Sup Dir	Lobo Médio	Lobo Inf Dir	Lobo Sup Esq	Lobo Inf Esq	YES	YES	YES	YES	NO	NO	NO	NO
119	<50	1	2020-03-26	POSITIVE FOR COVID	NO	0	1 - Leve (<25%)	Vidro Fosco e Consolidação	Aspecto Redondo			Espessamento Brônquico			Periferico	Dois ou Mais Lobos	Bilateral	Lobo Sup Dir		Lobo Inf Dir				0			#REF!								Unico Lobo	Unilateral						NO	NO	YES	NO	YES	NO	NO	NO
120	<50	1	2020-03-11	POSITIVE FOR COVID	YES		1 - Leve (<25%)	Vidro Fosco e Consolidação	Aspecto Redondo	Pav Mosaico	Sinal do Halo Reverso				Central e Periferico	Dois ou Mais Lobos	Bilateral	Lobo Sup Dir	Lobo Médio	Lobo Inf Dir	Lobo Sup Esq	Lobo Inf Esq	YES		1 - Leve (<25%)	Vidro Fosco e Consolidação	#REF!	Aspecto Redondo	Pav Mosaico					Central e Periferico	Dois ou Mais Lobos	Bilateral	Lobo Sup Dir	Lobo Médio	Lobo Inf Dir	Lobo Sup Esq	Lobo Inf Esq	YES	YES	YES	YES	YES	NO	NO	NO
121	71-80	2	2020-03-20	POSITIVE FOR COVID	NO	3	2 - Moderado (25-50%)	Vidro Fosco e Consolidação	Aspecto Redondo	Pav Mosaico		Espessamento Brônquico			Periferico	Dois ou Mais Lobos	Bilateral	Lobo Sup Dir	Lobo Médio	Lobo Inf Dir	Lobo Sup Esq	Lobo Inf Esq	YES	3	2 - Moderado (25-50%)	Vidro Fosco e Consolidação	#REF!	Aspecto Redondo	Pav Mosaico		Espessamento Brônquico			Central e Periferico	Dois ou Mais Lobos	Bilateral	Lobo Sup Dir	Lobo Médio	Lobo Inf Dir	Lobo Sup Esq	Lobo Inf Esq	YES	NO	NO	YES	NO	NO	YES	YES
122	51-60	2	2020-03-22	POSITIVE FOR COVID	NO	0	1 - Leve (<25%)	Vidro Fosco e Consolidação				Espessamento Brônquico			Central e Periferico	Dois ou Mais Lobos	Bilateral			Lobo Inf Dir	Lobo Sup Esq			0			#REF!								Unico Lobo	Unilateral						NO	YES	YES	NO	YES	NO	NO	NO
123	71-80	1	2020-03-06	POSITIVE FOR COVID	NO		2 - Moderado (25-50%)	Vidro Fosco Pura		Pav Mosaico		Espessamento Brônquico			Central e Periferico	Dois ou Mais Lobos	Bilateral	Lobo Sup Dir	Lobo Médio	Lobo Inf Dir	Lobo Sup Esq	Lobo Inf Esq	YES		2 - Moderado (25-50%)	Vidro Fosco Pura	#REF!		Pav Mosaico		Espessamento Brônquico			Central e Periferico	Dois ou Mais Lobos	Bilateral	Lobo Sup Dir	Lobo Médio	Lobo Inf Dir	Lobo Sup Esq	Lobo Inf Esq	YES	YES	YES	YES	YES	NO	YES	NO
124	71-80	2	2020-03-07	POSITIVE FOR COVID	NO	1	1 - Leve (<25%)	Vidro Fosco e Consolidação	Aspecto Redondo	Pav Mosaico		Espessamento Brônquico			Periferico	Dois ou Mais Lobos	Bilateral	Lobo Sup Dir	Lobo Médio	Lobo Inf Dir	Lobo Sup Esq	Lobo Inf Esq	YES	1	1 - Leve (<25%)	Vidro Fosco e Consolidação	#REF!	Aspecto Redondo	Pav Mosaico		Espessamento Brônquico			Periferico	Dois ou Mais Lobos	Bilateral	Lobo Sup Dir	Lobo Médio	Lobo Inf Dir	Lobo Sup Esq	Lobo Inf Esq	NO	NO	NO	NO	NO	NO	YES	YES
125	71-80	2	2020-03-09	POSITIVE FOR COVID	NO	0	2 - Moderado (25-50%)	Vidro Fosco Pura	Aspecto Redondo	Pav Mosaico					Central e Periferico	Dois ou Mais Lobos	Bilateral	Lobo Sup Dir	Lobo Médio	Lobo Inf Dir	Lobo Sup Esq	Lobo Inf Esq	YES	0	2 - Moderado (25-50%)	Vidro Fosco Pura	#REF!	Aspecto Redondo	Pav Mosaico					Central e Periferico	Dois ou Mais Lobos	Bilateral	Lobo Sup Dir	Lobo Médio	Lobo Inf Dir	Lobo Sup Esq	Lobo Inf Esq	NO	YES	YES	NO	NO	NO	NO	NO
126	71-80	1	2020-04-03	POSITIVE FOR COVID	NO	0	1 - Leve (<25%)	Vidro Fosco e Consolidação				Espessamento Brônquico			Central e Periferico	Dois ou Mais Lobos	Bilateral			Lobo Inf Dir		Lobo Inf Esq		0			#REF!								Unico Lobo	Unilateral						NO	NO	NO	NO	NO	NO	NO	NO
127	<50	1	2020-04-04	POSITIVE FOR COVID	NO		1 - Leve (<25%)	Vidro Fosco Pura	Aspecto Redondo						Periferico	Unico Lobo	Unilateral			Lobo Inf Dir							#REF!								Unico Lobo	Unilateral						NO	NO	YES	NO	NO	NO	NO	YES
128	71-80	2	2020-03-17	POSITIVE FOR COVID	NO	1	1 - Leve (<25%)	Vidro Fosco Pura	Aspecto Redondo	Pav Mosaico					Periferico	Dois ou Mais Lobos	Bilateral	Lobo Sup Dir	Lobo Médio	Lobo Inf Dir	Lobo Sup Esq	Lobo Inf Esq	YES	1	1 - Leve (<25%)	Vidro Fosco Pura	#REF!	Aspecto Redondo	Pav Mosaico					Periferico	Dois ou Mais Lobos	Bilateral	Lobo Sup Dir	Lobo Médio	Lobo Inf Dir	Lobo Sup Esq	Lobo Inf Esq	YES	YES	YES	NO	YES	NO	NO	NO
129	61-70	2	2020-03-13	POSITIVE FOR COVID	NO	4	2 - Moderado (25-50%)	Vidro Fosco e Consolidação		Pav Mosaico		Espessamento Brônquico			Central e Periferico	Dois ou Mais Lobos	Bilateral	Lobo Sup Dir	Lobo Médio	Lobo Inf Dir	Lobo Sup Esq	Lobo Inf Esq	YES	4	2 - Moderado (25-50%)	Vidro Fosco e Consolidação	#REF!		Pav Mosaico	Sinal do Halo Reverso	Espessamento Brônquico			Central e Periferico	Dois ou Mais Lobos	Bilateral	Lobo Sup Dir	Lobo Médio	Lobo Inf Dir	Lobo Sup Esq	Lobo Inf Esq	NO	YES	YES	NO	NO	NO	YES	NO
130	51-60	2	2020-03-25	POSITIVE FOR COVID	NO	1	2 - Moderado (25-50%)	Vidro Fosco Pura	Aspecto Redondo	Pav Mosaico	Sinal do Halo Reverso	Espessamento Brônquico			Central e Periferico	Dois ou Mais Lobos	Bilateral	Lobo Sup Dir	Lobo Médio	Lobo Inf Dir	Lobo Sup Esq	Lobo Inf Esq		1			#REF!								Unico Lobo	Unilateral						YES	YES	YES	NO	NO	NO	NO	NO
131	61-70	1	2020-03-09	POSITIVE FOR COVID	YES	0	1 - Leve (<25%)	Vidro Fosco Pura	Aspecto Redondo	Pav Mosaico	Sinal do Halo Reverso				Periferico	Dois ou Mais Lobos	Bilateral	Lobo Sup Dir	Lobo Médio	Lobo Inf Dir	Lobo Sup Esq	Lobo Inf Esq	YES	0	1 - Leve (<25%)	Vidro Fosco Pura	#REF!	Aspecto Redondo	Pav Mosaico	Sinal do Halo Reverso	Espessamento Brônquico			Periferico	Dois ou Mais Lobos	Bilateral	Lobo Sup Dir	Lobo Médio	Lobo Inf Dir	Lobo Sup Esq	Lobo Inf Esq	YES	NO	YES	NO	NO	NO	NO	NO
132	51-60	1	2020-03-14	POSITIVE FOR COVID	NO	0	Não Se Aplica	Ausência de Opacidades				Espessamento Brônquico			Ausência de Opacidades								Não	0	Não Se Aplica	Ausência de Opacidades	#REF!				Espessamento Brônquico			Ausência de Opacidades								YES	NO	YES	NO	NO	YES	NO	NO
133	71-80	2	2020-03-23	POSITIVE FOR COVID	YES	3	1 - Leve (<25%)	Vidro Fosco e Consolidação		Pav Mosaico		Espessamento Brônquico	Derrame Pleural		Central e Periferico	Dois ou Mais Lobos	Bilateral	Lobo Sup Dir	Lobo Médio	Lobo Inf Dir	Lobo Sup Esq		Duvidosa	3	1 - Leve (<25%)	Vidro Fosco e Consolidação	#REF!		Pav Mosaico		Espessamento Brônquico	Derrame Pleural		Central e Periferico	Dois ou Mais Lobos	Bilateral	Lobo Sup Dir	Lobo Médio	Lobo Inf Dir	Lobo Sup Esq	Lobo Inf Esq	YES	YES	NO	NO	NO	NO	NO	NO
134	<50	1	2020-03-10	POSITIVE FOR COVID	NO		1 - Leve (<25%)	Vidro Fosco e Consolidação		Pav Mosaico		Espessamento Brônquico			Periferico	Dois ou Mais Lobos	Bilateral	Lobo Sup Dir			Lobo Sup Esq		YES		1 - Leve (<25%)	Vidro Fosco e Consolidação	#REF!		Pav Mosaico		Espessamento Brônquico			Periferico	Dois ou Mais Lobos	Bilateral	Lobo Sup Dir			Lobo Sup Esq		YES	NO	NO	NO	NO	NO	NO	YES
135	<50	2	2020-03-18	POSITIVE FOR COVID	NO		1 - Leve (<25%)	Vidro Fosco e Consolidação			Sinal do Halo Reverso	Espessamento Brônquico			Central e Periferico	Dois ou Mais Lobos	Bilateral	Lobo Sup Dir		Lobo Inf Dir	Lobo Sup Esq	Lobo Inf Esq	Duvidosa		1 - Leve (<25%)	Vidro Fosco e Consolidação	#REF!				Espessamento Brônquico			Central e Periferico	Dois ou Mais Lobos	Bilateral	Lobo Sup Dir		Lobo Inf Dir	Lobo Sup Esq	Lobo Inf Esq	NO	YES	YES	NO	NO	NO	NO	NO
136	<50	1	2020-03-16	POSITIVE FOR COVID	NO	0	1 - Leve (<25%)	Vidro Fosco Pura							Periferico	Unico Lobo	Unilateral				Lobo Sup Esq		Duvidosa	0	1 - Leve (<25%)	Vidro Fosco Pura	#REF!							Periferico	Unico Lobo	Unilateral				Lobo Sup Esq		NO	YES	YES	NO	NO	NO	NO	YES
137	<50	1	2020-04-03	POSITIVE FOR COVID	NO	0	1 - Leve (<25%)	Vidro Fosco Pura	Aspecto Redondo	Pav Mosaico	Sinal do Halo Reverso	Espessamento Brônquico			Periferico	Unico Lobo	Unilateral					Lobo Inf Esq		0			#REF!								Unico Lobo	Unilateral						NO	YES	YES	NO	YES	NO	NO	NO
138	<50	1	2020-03-27	POSITIVE FOR COVID	NO	3	1 - Leve (<25%)	Vidro Fosco e Consolidação	Aspecto Redondo			Espessamento Brônquico			Periferico	Dois ou Mais Lobos	Bilateral			Lobo Inf Dir		Lobo Inf Esq		3			#REF!								Unico Lobo	Unilateral						YES	YES	YES	NO	YES	NO	NO	NO
139	<50	1	2020-03-06	POSITIVE FOR COVID	NO	0	1 - Leve (<25%)	Vidro Fosco Pura	Aspecto Redondo	Pav Mosaico					Periferico	Dois ou Mais Lobos	Bilateral	Lobo Sup Dir	Lobo Médio	Lobo Inf Dir	Lobo Sup Esq	Lobo Inf Esq	YES	0	1 - Leve (<25%)	Vidro Fosco Pura	#REF!	Aspecto Redondo	Pav Mosaico		Espessamento Brônquico			Periferico	Dois ou Mais Lobos	Bilateral	Lobo Sup Dir	Lobo Médio	Lobo Inf Dir	Lobo Sup Esq	Lobo Inf Esq	NO	YES	YES	NO	YES	NO	YES	NO
140	71-80	2	2020-03-16	POSITIVE FOR COVID	YES	1	2 - Moderado (25-50%)	Vidro Fosco Pura	Aspecto Redondo	Pav Mosaico		Espessamento Brônquico			Central e Periferico	Dois ou Mais Lobos	Bilateral	Lobo Sup Dir	Lobo Médio	Lobo Inf Dir	Lobo Sup Esq	Lobo Inf Esq	YES	1	2 - Moderado (25-50%)	Vidro Fosco Pura	#REF!	Aspecto Redondo	Pav Mosaico					Central e Periferico	Dois ou Mais Lobos	Bilateral	Lobo Sup Dir	Lobo Médio	Lobo Inf Dir	Lobo Sup Esq	Lobo Inf Esq	YES	YES	YES	NO	NO	NO	NO	YES
141	<50	1	2020-03-15	POSITIVE FOR COVID	NO	0	1 - Leve (<25%)	Vidro Fosco Pura		Pav Mosaico					Central e Periferico	Dois ou Mais Lobos	Bilateral	Lobo Sup Dir	Lobo Médio	Lobo Inf Dir	Lobo Sup Esq		YES	0	1 - Leve (<25%)	Vidro Fosco Pura	#REF!		Pav Mosaico					Central e Periferico	Dois ou Mais Lobos	Bilateral	Lobo Sup Dir	Lobo Médio	Lobo Inf Dir	Lobo Sup Esq	Lobo Inf Esq	NO	NO	NO	NO	YES	NO	NO	NO
142	61-70	2	2020-03-22	POSITIVE FOR COVID	YES	4	2 - Moderado (25-50%)	Vidro Fosco Pura		Pav Mosaico	Sinal do Halo Reverso	Espessamento Brônquico			Central e Periferico	Dois ou Mais Lobos	Bilateral	Lobo Sup Dir	Lobo Médio	Lobo Inf Dir	Lobo Sup Esq	Lobo Inf Esq		4			#REF!								Unico Lobo	Unilateral						YES	YES	YES	NO	YES	NO	YES	YES
143	<50	1	2020-03-19	POSITIVE FOR COVID	NO	0	1 - Leve (<25%)	Vidro Fosco Pura	Aspecto Redondo	Pav Mosaico		Espessamento Brônquico			Periferico	Dois ou Mais Lobos	Bilateral			Lobo Inf Dir	Lobo Sup Esq	Lobo Inf Esq		0			#REF!								Unico Lobo	Unilateral						NO	NO	YES	NO	NO	YES	NO	NO
144	<50	1	2020-03-12	POSITIVE FOR COVID	NO	3	1 - Leve (<25%)	Vidro Fosco e Consolidação	Aspecto Redondo	Pav Mosaico	Sinal do Halo Reverso				Periferico	Dois ou Mais Lobos	Bilateral	Lobo Sup Dir	Lobo Médio	Lobo Inf Dir	Lobo Sup Esq	Lobo Inf Esq	YES	3	1 - Leve (<25%)	Vidro Fosco e Consolidação	#REF!	Aspecto Redondo	Pav Mosaico	Sinal do Halo Reverso				Periferico	Dois ou Mais Lobos	Bilateral	Lobo Sup Dir	Lobo Médio	Lobo Inf Dir	Lobo Sup Esq	Lobo Inf Esq	NO	YES	YES	NO	NO	NO	YES	NO
145	51-60	3	2020-02-25	POSITIVE FOR COVID	YES		1 - Leve (<25%)	Vidro Fosco Pura	Aspecto Redondo	Pav Mosaico	Sinal do Halo Reverso	Espessamento Brônquico			Periferico	Dois ou Mais Lobos	Bilateral	Lobo Sup Dir	Lobo Médio	Lobo Inf Dir	Lobo Sup Esq	Lobo Inf Esq	YES		1 - Leve (<25%)	Vidro Fosco Pura	#REF!	Aspecto Redondo	Pav Mosaico	Sinal do Halo Reverso	Espessamento Brônquico			Periferico	Dois ou Mais Lobos	Bilateral	Lobo Sup Dir	Lobo Médio	Lobo Inf Dir	Lobo Sup Esq	Lobo Inf Esq	YES	YES	YES	NO	NO	NO	YES	NO
146	71-80	2	2020-03-14	POSITIVE FOR COVID	NO	1	2 - Moderado (25-50%)	Vidro Fosco e Consolidação	Aspecto Redondo	Pav Mosaico		Espessamento Brônquico	Derrame Pleural		Central e Periferico	Dois ou Mais Lobos	Bilateral	Lobo Sup Dir	Lobo Médio	Lobo Inf Dir	Lobo Sup Esq	Lobo Inf Esq		1			#REF!								Unico Lobo	Unilateral						YES	NO	YES	NO	NO	NO	NO	YES
147	71-80	2	2020-03-28	POSITIVE FOR COVID	NO	0	1 - Leve (<25%)	Vidro Fosco Pura	Aspecto Redondo	Pav Mosaico		Espessamento Brônquico			Periferico	Dois ou Mais Lobos	Bilateral	Lobo Sup Dir	Lobo Médio	Lobo Inf Dir	Lobo Sup Esq	Lobo Inf Esq		0			#REF!								Unico Lobo	Unilateral						YES	NO	NO	YES	NO	NO	NO	NO
148	71-80	1	2020-03-13	POSITIVE FOR COVID	NO	1	1 - Leve (<25%)	Vidro Fosco Pura	Aspecto Redondo	Pav Mosaico					Periferico	Dois ou Mais Lobos	Unilateral				Lobo Sup Esq	Lobo Inf Esq	YES	1	1 - Leve (<25%)	Vidro Fosco e Consolidação	#REF!	Aspecto Redondo	Pav Mosaico		Espessamento Brônquico			Periferico	Dois ou Mais Lobos	Unilateral				Lobo Sup Esq	Lobo Inf Esq	NO	YES	NO	YES	NO	NO	NO	NO
149	>80	2	2020-04-03	POSITIVE FOR COVID	NO	1	Não Se Aplica	Ausência de Opacidades				Espessamento Brônquico	Derrame Pleural		Ausência de Opacidades									1			#REF!								Unico Lobo	Unilateral						YES	NO	NO	NO	NO	NO	NO	YES
150	51-60	1	2020-03-28	POSITIVE FOR COVID	NO	0	1 - Leve (<25%)	Vidro Fosco Pura	Aspecto Redondo	Pav Mosaico		Espessamento Brônquico			Central e Periferico	Dois ou Mais Lobos	Bilateral	Lobo Sup Dir	Lobo Médio	Lobo Inf Dir	Lobo Sup Esq	Lobo Inf Esq		0			#REF!								Unico Lobo	Unilateral						NO	YES	YES	NO	NO	NO	YES	NO
151	71-80	2	2020-03-13	POSITIVE FOR COVID	NO	0	2 - Moderado (25-50%)	Vidro Fosco Pura	Aspecto Redondo	Pav Mosaico		Espessamento Brônquico			Central e Periferico	Dois ou Mais Lobos	Bilateral	Lobo Sup Dir	Lobo Médio	Lobo Inf Dir	Lobo Sup Esq	Lobo Inf Esq		0			#REF!								Unico Lobo	Unilateral						YES	NO	YES	NO	NO	NO	YES	NO
152	<50	1	2020-03-16	POSITIVE FOR COVID	NO	0	1 - Leve (<25%)	Vidro Fosco Pura	Aspecto Redondo	Pav Mosaico	Sinal do Halo Reverso	Espessamento Brônquico			Periferico	Dois ou Mais Lobos	Bilateral	Lobo Sup Dir	Lobo Médio	Lobo Inf Dir	Lobo Sup Esq	Lobo Inf Esq	YES	0	1 - Leve (<25%)	Vidro Fosco Pura	#REF!	Aspecto Redondo	Pav Mosaico		Espessamento Brônquico			Periferico	Dois ou Mais Lobos	Bilateral	Lobo Sup Dir	Lobo Médio	Lobo Inf Dir	Lobo Sup Esq	Lobo Inf Esq	NO	NO	YES	NO	NO	NO	NO	NO
153	71-80	2	2020-03-23	POSITIVE FOR COVID	NO		1 - Leve (<25%)	Vidro Fosco e Consolidação		Pav Mosaico		Espessamento Brônquico			Periferico	Dois ou Mais Lobos	Bilateral			Lobo Inf Dir		Lobo Inf Esq					#REF!								Unico Lobo	Unilateral						YES	YES	YES	YES	NO	NO	YES	NO
154	61-70	2	2020-03-26	POSITIVE FOR COVID	NO	0	Grave (>50%)	Vidro Fosco Pura		Pav Mosaico		Espessamento Brônquico			Central e Periferico	Dois ou Mais Lobos	Bilateral	Lobo Sup Dir	Lobo Médio	Lobo Inf Dir	Lobo Sup Esq	Lobo Inf Esq		0			#REF!								Unico Lobo	Unilateral						YES	YES	NO	YES	NO	NO	NO	YES
155	71-80	2	2020-03-28	POSITIVE FOR COVID	NO	4	1 - Leve (<25%)	Vidro Fosco e Consolidação	Aspecto Redondo	Pav Mosaico		Espessamento Brônquico			Periferico	Dois ou Mais Lobos	Bilateral			Lobo Inf Dir		Lobo Inf Esq		4			#REF!								Unico Lobo	Unilateral						NO	YES	NO	NO	NO	NO	NO	NO
156	>80	2	2020-04-05	POSITIVE FOR COVID	YES		1 - Leve (<25%)	Vidro Fosco Pura				Espessamento Brônquico			Central e Periferico	Dois ou Mais Lobos	Bilateral			Lobo Inf Dir		Lobo Inf Esq					#REF!								Unico Lobo	Unilateral						NO	NO	NO	NO	NO	NO	NO	NO
157	<50	2	2020-03-26	POSITIVE FOR COVID	NO	3	1 - Leve (<25%)	Vidro Fosco e Consolidação	Aspecto Redondo	Pav Mosaico		Espessamento Brônquico			Periferico	Dois ou Mais Lobos	Bilateral		Lobo Médio	Lobo Inf Dir		Lobo Inf Esq		3			#REF!								Unico Lobo	Unilateral						YES	YES	YES	NO	NO	NO	NO	NO
158	<50	1	2020-04-02	POSITIVE FOR COVID	NO	0	1 - Leve (<25%)	Vidro Fosco Pura	Aspecto Redondo	Pav Mosaico		Espessamento Brônquico			Periferico	Unico Lobo	Unilateral			Lobo Inf Dir				0			#REF!								Unico Lobo	Unilateral						YES	YES	YES	NO	NO	NO	NO	YES
159	71-80	3	2020-03-10	POSITIVE FOR COVID	YES	5	1 - Leve (<25%)	Vidro Fosco e Consolidação		Pav Mosaico			Derrame Pleural		Central e Periferico	Dois ou Mais Lobos	Bilateral	Lobo Sup Dir		Lobo Inf Dir	Lobo Sup Esq	Lobo Inf Esq	Duvidosa	5	1 - Leve (<25%)	Vidro Fosco e Consolidação	#REF!		Pav Mosaico			Derrame Pleural		Central e Periferico	Dois ou Mais Lobos	Bilateral	Lobo Sup Dir		Lobo Inf Dir	Lobo Sup Esq	Lobo Inf Esq	YES	YES	NO	NO	NO	NO	NO	YES
160	71-80	2	2020-03-26	POSITIVE FOR COVID	NO	4	2 - Moderado (25-50%)	Vidro Fosco e Consolidação	Aspecto Redondo	Pav Mosaico	Sinal do Halo Reverso	Espessamento Brônquico			Periferico	Dois ou Mais Lobos	Bilateral	Lobo Sup Dir	Lobo Médio	Lobo Inf Dir	Lobo Sup Esq	Lobo Inf Esq		4			#REF!								Unico Lobo	Unilateral						YES	NO	YES	YES	NO	NO	NO	NO
161	71-80	1	2020-03-21	POSITIVE FOR COVID	NO	0	1 - Leve (<25%)	Vidro Fosco e Consolidação	Aspecto Redondo	Pav Mosaico					Periferico	Dois ou Mais Lobos	Bilateral	Lobo Sup Dir	Lobo Médio	Lobo Inf Dir	Lobo Sup Esq	Lobo Inf Esq		0			#REF!								Unico Lobo	Unilateral						NO	YES	YES	NO	NO	NO	NO	NO
162	51-60	1	2020-03-28	POSITIVE FOR COVID	NO	3	1 - Leve (<25%)	Vidro Fosco e Consolidação	Aspecto Redondo		Sinal do Halo Reverso	Espessamento Brônquico			Periferico	Unico Lobo	Unilateral					Lobo Inf Esq		3			#REF!								Unico Lobo	Unilateral						NO	NO	YES	NO	NO	NO	NO	YES
163	61-70	3	2020-03-17	POSITIVE FOR COVID	YES	1	2 - Moderado (25-50%)	Vidro Fosco Pura	Aspecto Redondo	Pav Mosaico	Sinal do Halo Reverso				Central e Periferico	Dois ou Mais Lobos	Bilateral	Lobo Sup Dir	Lobo Médio	Lobo Inf Dir	Lobo Sup Esq	Lobo Inf Esq	YES	1	2 - Moderado (25-50%)	Vidro Fosco Pura	#REF!	Aspecto Redondo	Pav Mosaico	Sinal do Halo Reverso				Central e Periferico	Dois ou Mais Lobos	Bilateral	Lobo Sup Dir	Lobo Médio	Lobo Inf Dir	Lobo Sup Esq	Lobo Inf Esq	YES	NO	YES	YES	NO	NO	NO	NO
164	<50	1	2020-03-08	POSITIVE FOR COVID	NO	1	2 - Moderado (25-50%)	Vidro Fosco e Consolidação		Pav Mosaico	Sinal do Halo Reverso				Central e Periferico	Dois ou Mais Lobos	Bilateral	Lobo Sup Dir	Lobo Médio	Lobo Inf Dir	Lobo Sup Esq	Lobo Inf Esq	YES	1	2 - Moderado (25-50%)	Vidro Fosco e Consolidação	#REF!		Pav Mosaico	Sinal do Halo Reverso				Central e Periferico	Dois ou Mais Lobos	Bilateral	Lobo Sup Dir	Lobo Médio	Lobo Inf Dir	Lobo Sup Esq	Lobo Inf Esq	YES	YES	NO	NO	NO	NO	NO	NO
165	61-70	1	2020-03-19	POSITIVE FOR COVID	NO	4	1 - Leve (<25%)	Vidro Fosco e Consolidação	Aspecto Redondo	Pav Mosaico	Sinal do Halo Reverso	Espessamento Brônquico			Periferico	Dois ou Mais Lobos	Bilateral	Lobo Sup Dir	Lobo Médio	Lobo Inf Dir	Lobo Sup Esq	Lobo Inf Esq		4			#REF!								Unico Lobo	Unilateral						NO	YES	YES	NO	NO	NO	NO	NO
166	61-70	2	2020-03-22	POSITIVE FOR COVID	NO	1	1 - Leve (<25%)	Vidro Fosco Pura	Aspecto Redondo	Pav Mosaico		Espessamento Brônquico			Periferico	Dois ou Mais Lobos	Bilateral	Lobo Sup Dir	Lobo Médio	Lobo Inf Dir	Lobo Sup Esq	Lobo Inf Esq		1			#REF!								Unico Lobo	Unilateral						NO	NO	NO	YES	NO	NO	YES	NO
167	51-60	2	2020-03-31	POSITIVE FOR COVID	NO		Grave (>50%)	Vidro Fosco Pura	Aspecto Redondo	Pav Mosaico		Espessamento Brônquico			Central e Periferico	Dois ou Mais Lobos	Bilateral	Lobo Sup Dir	Lobo Médio	Lobo Inf Dir	Lobo Sup Esq	Lobo Inf Esq					#REF!								Unico Lobo	Unilateral						YES	NO	YES	YES	NO	NO	NO	NO
168	51-60	3	2020-03-08	POSITIVE FOR COVID	NO	1	Grave (>50%)	Vidro Fosco Pura	Aspecto Redondo	Pav Mosaico		Espessamento Brônquico			Central e Periferico	Dois ou Mais Lobos	Bilateral	Lobo Sup Dir	Lobo Médio	Lobo Inf Dir	Lobo Sup Esq	Lobo Inf Esq	YES	1	Grave (>50%)	Vidro Fosco Pura	#REF!	Aspecto Redondo	Pav Mosaico		Espessamento Brônquico			Central e Periferico	Dois ou Mais Lobos	Bilateral	Lobo Sup Dir	Lobo Médio	Lobo Inf Dir	Lobo Sup Esq	Lobo Inf Esq	YES	YES	YES	YES	YES	YES	NO	NO
169	<50	1	2020-03-27	POSITIVE FOR COVID	NO	0	1 - Leve (<25%)	Vidro Fosco Pura	Aspecto Redondo						Periferico	Dois ou Mais Lobos	Unilateral		Lobo Médio	Lobo Inf Dir				0			#REF!								Unico Lobo	Unilateral						NO	YES	YES	NO	YES	NO	NO	YES
170	71-80	2	2020-03-23	POSITIVE FOR COVID	NO	4	2 - Moderado (25-50%)	Vidro Fosco e Consolidação		Pav Mosaico	Sinal do Halo Reverso				Central e Periferico	Dois ou Mais Lobos	Bilateral	Lobo Sup Dir		Lobo Inf Dir	Lobo Sup Esq	Lobo Inf Esq		4			#REF!								Unico Lobo	Unilateral						NO	NO	NO	NO	NO	NO	YES	NO
171	<50	1	2020-03-08	POSITIVE FOR COVID	NO	0	1 - Leve (<25%)	Vidro Fosco Pura	Aspecto Redondo	Pav Mosaico	Sinal do Halo Reverso	Espessamento Brônquico			Central e Periferico	Dois ou Mais Lobos	Bilateral	Lobo Sup Dir	Lobo Médio	Lobo Inf Dir	Lobo Sup Esq	Lobo Inf Esq	YES	0	1 - Leve (<25%)	Vidro Fosco Pura	#REF!	Aspecto Redondo	Pav Mosaico	Sinal do Halo Reverso	Espessamento Brônquico			Central e Periferico	Dois ou Mais Lobos	Bilateral	Lobo Sup Dir	Lobo Médio	Lobo Inf Dir	Lobo Sup Esq	Lobo Inf Esq	YES	YES	YES	NO	NO	NO	NO	NO
172	71-80	2	2020-03-27	POSITIVE FOR COVID	NO	1	2 - Moderado (25-50%)	Vidro Fosco e Consolidação	Aspecto Redondo	Pav Mosaico	Sinal do Halo Reverso				Central e Periferico	Dois ou Mais Lobos	Bilateral	Lobo Sup Dir	Lobo Médio	Lobo Inf Dir	Lobo Sup Esq	Lobo Inf Esq		1			#REF!								Unico Lobo	Unilateral						NO	YES	YES	YES	NO	NO	NO	NO
173	<50	1	2020-03-28	POSITIVE FOR COVID	NO		1 - Leve (<25%)	Vidro Fosco Pura	Aspecto Redondo	Pav Mosaico					Periferico	Dois ou Mais Lobos	Bilateral			Lobo Inf Dir		Lobo Inf Esq					#REF!								Unico Lobo	Unilateral						YES	NO	YES	NO	YES	YES	NO	NO
174	<50	1	2020-03-19	POSITIVE FOR COVID	NO	0	1 - Leve (<25%)	Vidro Fosco Pura	Aspecto Redondo						Central e Periferico	Dois ou Mais Lobos	Bilateral	Lobo Sup Dir	Lobo Médio	Lobo Inf Dir	Lobo Sup Esq	Lobo Inf Esq	YES	0	1 - Leve (<25%)	Vidro Fosco Pura	#REF!	Aspecto Redondo						Central e Periferico	Dois ou Mais Lobos	Bilateral	Lobo Sup Dir		Lobo Inf Dir	Lobo Sup Esq	Lobo Inf Esq	NO	NO	YES	NO	NO	NO	NO	YES
175	61-70	2	2020-03-19	POSITIVE FOR COVID	NO	3	1 - Leve (<25%)	Vidro Fosco e Consolidação		Pav Mosaico		Espessamento Brônquico			Central e Periferico	Dois ou Mais Lobos	Bilateral	Lobo Sup Dir	Lobo Médio	Lobo Inf Dir	Lobo Sup Esq	Lobo Inf Esq		3			#REF!								Unico Lobo	Unilateral						NO	NO	NO	YES	NO	NO	NO	YES
176	61-70	2	2020-03-03	POSITIVE FOR COVID	YES	0	Grave (>50%)	Vidro Fosco Pura	Aspecto Redondo	Pav Mosaico	Sinal do Halo Reverso	Espessamento Brônquico			Central e Periferico	Dois ou Mais Lobos	Bilateral	Lobo Sup Dir	Lobo Médio	Lobo Inf Dir	Lobo Sup Esq	Lobo Inf Esq	YES	0	Grave (>50%)	Vidro Fosco Pura	#REF!	Aspecto Redondo	Pav Mosaico		Espessamento Brônquico			Central e Periferico	Dois ou Mais Lobos	Bilateral	Lobo Sup Dir	Lobo Médio	Lobo Inf Dir	Lobo Sup Esq	Lobo Inf Esq	NO	NO	YES	NO	NO	YES	NO	NO
177	51-60	3	2020-03-19	POSITIVE FOR COVID	NO	1	2 - Moderado (25-50%)	Vidro Fosco e Consolidação	Aspecto Redondo	Pav Mosaico		Espessamento Brônquico			Central e Periferico	Dois ou Mais Lobos	Bilateral	Lobo Sup Dir	Lobo Médio	Lobo Inf Dir	Lobo Sup Esq	Lobo Inf Esq	YES	1	2 - Moderado (25-50%)	Vidro Fosco e Consolidação	#REF!	Aspecto Redondo	Pav Mosaico		Espessamento Brônquico			Central e Periferico	Dois ou Mais Lobos	Bilateral	Lobo Sup Dir	Lobo Médio	Lobo Inf Dir	Lobo Sup Esq	Lobo Inf Esq	NO	YES	YES	YES	NO	NO	NO	NO
178	71-80	3	2020-03-05	POSITIVE FOR COVID	YES	5	2 - Moderado (25-50%)	Vidro Fosco e Consolidação		Pav Mosaico			Derrame Pleural		Central e Periferico	Dois ou Mais Lobos	Bilateral	Lobo Sup Dir	Lobo Médio	Lobo Inf Dir	Lobo Sup Esq	Lobo Inf Esq	Duvidosa	5	2 - Moderado (25-50%)	Vidro Fosco e Consolidação	#REF!		Pav Mosaico			Derrame Pleural		Central e Periferico	Dois ou Mais Lobos	Bilateral	Lobo Sup Dir	Lobo Médio	Lobo Inf Dir	Lobo Sup Esq	Lobo Inf Esq	YES	NO	NO	NO	NO	NO	NO	NO
179	61-70	2	2020-03-18	POSITIVE FOR COVID	NO	3	2 - Moderado (25-50%)	Vidro Fosco e Consolidação	Aspecto Redondo	Pav Mosaico	Sinal do Halo Reverso				Periferico	Dois ou Mais Lobos	Bilateral	Lobo Sup Dir	Lobo Médio	Lobo Inf Dir	Lobo Sup Esq	Lobo Inf Esq	YES	3	2 - Moderado (25-50%)	Vidro Fosco e Consolidação	#REF!	Aspecto Redondo	Pav Mosaico	Sinal do Halo Reverso				Periferico	Dois ou Mais Lobos	Bilateral	Lobo Sup Dir	Lobo Médio	Lobo Inf Dir	Lobo Sup Esq	Lobo Inf Esq	YES	YES	YES	NO	NO	NO	NO	NO
180	<50	1	2020-04-01	POSITIVE FOR COVID	NO		NOrmal	Ausência de Opacidades							Ausência de Opacidades												#REF!								Unico Lobo	Unilateral						NO	NO	NO	NO	NO	NO	NO	NO
181	<50	1	2020-04-05	POSITIVE FOR COVID	NO		Não Se Aplica	Ausência de Opacidades				Espessamento Brônquico			Ausência de Opacidades												#REF!								Unico Lobo	Unilateral						NO	YES	YES	NO	YES	NO	NO	NO
182	>80	2	2020-03-03	POSITIVE FOR COVID	YES	1	1 - Leve (<25%)	Vidro Fosco Pura		Pav Mosaico		Espessamento Brônquico	Derrame Pleural		Periferico	Dois ou Mais Lobos	Bilateral	Lobo Sup Dir	Lobo Médio	Lobo Inf Dir	Lobo Sup Esq	Lobo Inf Esq		1			#REF!								Unico Lobo	Unilateral						NO	NO	NO	NO	NO	NO	NO	NO
183	>80	2	2020-03-22	POSITIVE FOR COVID	NO	4	1 - Leve (<25%)	Vidro Fosco e Consolidação				Espessamento Brônquico	Derrame Pleural		Periferico	Unico Lobo	Unilateral			Lobo Inf Dir		Lobo Inf Esq	Duvidosa	4	1 - Leve (<25%)	Vidro Fosco e Consolidação	#REF!		Pav Mosaico		Espessamento Brônquico	Derrame Pleural		Periferico	Unico Lobo	Unilateral			Lobo Inf Dir		Lobo Inf Esq	NO	YES	YES	YES	NO	NO	YES	NO
184	>80	2	2020-03-21	POSITIVE FOR COVID	NO		1 - Leve (<25%)	Vidro Fosco Pura	Aspecto Redondo	Pav Mosaico		Espessamento Brônquico			Central e Periferico	Dois ou Mais Lobos	Bilateral	Lobo Sup Dir	Lobo Médio	Lobo Inf Dir	Lobo Sup Esq	Lobo Inf Esq					#REF!								Unico Lobo	Unilateral						YES	YES	YES	YES	NO	NO	NO	NO
185	<50	1	2020-03-13	POSITIVE FOR COVID	NO	0	Não Se Aplica	Ausência de Opacidades				Espessamento Brônquico			Ausência de Opacidades								Não	0	Não Se Aplica	Ausência de Opacidades	#REF!				Espessamento Brônquico			Ausência de Opacidades								NO	YES	YES	NO	YES	NO	NO	NO
186	>80	2	2020-03-26	POSITIVE FOR COVID	NO	0	2 - Moderado (25-50%)	Vidro Fosco e Consolidação	Aspecto Redondo	Pav Mosaico		Espessamento Brônquico	Derrame Pleural		Central e Periferico	Dois ou Mais Lobos	Bilateral	Lobo Sup Dir	Lobo Médio	Lobo Inf Dir	Lobo Sup Esq	Lobo Inf Esq		0			#REF!								Unico Lobo	Unilateral						NO	NO	YES	NO	NO	NO	NO	NO
187	71-80	3	2020-03-25	POSITIVE FOR COVID	NO	0	1 - Leve (<25%)	Vidro Fosco Pura	Aspecto Redondo	Pav Mosaico		Espessamento Brônquico			Central e Periferico	Dois ou Mais Lobos	Bilateral	Lobo Sup Dir	Lobo Médio	Lobo Inf Dir	Lobo Sup Esq	Lobo Inf Esq		0			#REF!								Unico Lobo	Unilateral						YES	YES	YES	NO	YES	NO	NO	NO
188	61-70	1	2020-03-19	POSITIVE FOR COVID	NO	3	2 - Moderado (25-50%)	Vidro Fosco e Consolidação	Aspecto Redondo	Pav Mosaico		Espessamento Brônquico			Central e Periferico	Dois ou Mais Lobos	Bilateral	Lobo Sup Dir	Lobo Médio	Lobo Inf Dir	Lobo Sup Esq	Lobo Inf Esq		3			#REF!								Unico Lobo	Unilateral						YES	YES	YES	YES	NO	NO	YES	YES
189	71-80	2	2020-03-15	POSITIVE FOR COVID	YES		1 - Leve (<25%)	Vidro Fosco e Consolidação				Espessamento Brônquico			Periferico	Dois ou Mais Lobos	Bilateral	Lobo Sup Dir	Lobo Médio		Lobo Sup Esq	Lobo Inf Esq					#REF!								Unico Lobo	Unilateral						YES	YES	YES	NO	NO	NO	NO	NO
190	71-80	3	2020-03-25	POSITIVE FOR COVID	YES	1	Grave (>50%)	Vidro Fosco e Consolidação	Aspecto Redondo	Pav Mosaico		Espessamento Brônquico			Central e Periferico	Dois ou Mais Lobos	Bilateral	Lobo Sup Dir	Lobo Médio	Lobo Inf Dir	Lobo Sup Esq	Lobo Inf Esq		1			#REF!								Unico Lobo	Unilateral						YES	YES	YES	YES	NO	NO	NO	YES
191	61-70	2	2020-03-18	POSITIVE FOR COVID	YES	3	1 - Leve (<25%)	Vidro Fosco Pura	Aspecto Redondo			Espessamento Brônquico			Periferico	Dois ou Mais Lobos	Unilateral			Lobo Inf Dir		Lobo Inf Esq	Duvidosa	3	1 - Leve (<25%)	Consolidação Pura	#REF!	Aspecto Redondo			Espessamento Brônquico	Derrame Pleural		Central e Periferico	Unico Lobo	Unilateral			Lobo Inf Dir		Lobo Inf Esq	YES	NO	NO	NO	NO	YES	NO	NO
192	61-70	2	2020-03-31	POSITIVE FOR COVID	NO	3	Grave (>50%)	Vidro Fosco e Consolidação	Aspecto Redondo	Pav Mosaico	Sinal do Halo Reverso	Espessamento Brônquico			Central e Periferico	Dois ou Mais Lobos	Bilateral	Lobo Sup Dir	Lobo Médio	Lobo Inf Dir	Lobo Sup Esq	Lobo Inf Esq		3			#REF!								Unico Lobo	Unilateral						YES	YES	YES	NO	NO	NO	NO	YES
193	71-80	2	2020-03-08	POSITIVE FOR COVID	YES	1	Grave (>50%)	Vidro Fosco Pura		Pav Mosaico	Sinal do Halo Reverso	Espessamento Brônquico			Central e Periferico	Dois ou Mais Lobos	Bilateral	Lobo Sup Dir	Lobo Médio	Lobo Inf Dir	Lobo Sup Esq	Lobo Inf Esq	YES	1	Grave (>50%)	Vidro Fosco Pura	#REF!		Pav Mosaico		Espessamento Brônquico			Central e Periferico	Dois ou Mais Lobos	Bilateral	Lobo Sup Dir	Lobo Médio	Lobo Inf Dir	Lobo Sup Esq	Lobo Inf Esq	YES	YES	NO	NO	NO	NO	NO	YES
194	<50	1	2020-03-15	POSITIVE FOR COVID	NO	0	1 - Leve (<25%)	Vidro Fosco e Consolidação	Aspecto Redondo						Periferico							Lobo Inf Esq	Duvidosa	0	1 - Leve (<25%)	Vidro Fosco e Consolidação	#REF!	Aspecto Redondo						Periferico	Unico Lobo	Unilateral					Lobo Inf Esq	YES	YES	YES	NO	NO	NO	NO	NO
195	<50	1	2020-03-12	POSITIVE FOR COVID	NO	1	1 - Leve (<25%)	Vidro Fosco Pura		Pav Mosaico		Espessamento Brônquico			Periferico	Dois ou Mais Lobos	Bilateral	Lobo Sup Dir	Lobo Médio	Lobo Inf Dir	Lobo Sup Esq	Lobo Inf Esq	YES	1	1 - Leve (<25%)	Vidro Fosco Pura	#REF!		Pav Mosaico	Sinal do Halo Reverso	Espessamento Brônquico			Periferico	Dois ou Mais Lobos	Bilateral	Lobo Sup Dir	Lobo Médio	Lobo Inf Dir	Lobo Sup Esq	Lobo Inf Esq	YES	YES	YES	NO	NO	NO	NO	NO
196	61-70	2	2020-03-20	POSITIVE FOR COVID	NO		2 - Moderado (25-50%)	Vidro Fosco Pura		Pav Mosaico					Central e Periferico	Dois ou Mais Lobos	Bilateral	Lobo Sup Dir	Lobo Médio	Lobo Inf Dir	Lobo Sup Esq	Lobo Inf Esq	YES		1 - Leve (<25%)	Vidro Fosco Pura	#REF!	Aspecto Redondo	Pav Mosaico	Sinal do Halo Reverso				Central e Periferico	Dois ou Mais Lobos	Bilateral	Lobo Sup Dir	Lobo Médio	Lobo Inf Dir	Lobo Sup Esq	Lobo Inf Esq	YES	YES	YES	NO	NO	NO	NO	NO
197	<50	1	2020-03-28	POSITIVE FOR COVID	NO	0	1 - Leve (<25%)	Vidro Fosco Pura	Aspecto Redondo	Pav Mosaico		Espessamento Brônquico			Periferico	Unico Lobo	Unilateral			Lobo Inf Dir				0			#REF!								Unico Lobo	Unilateral						YES	NO	YES	NO	NO	NO	NO	NO
198	<50	1	2020-04-03	POSITIVE FOR COVID	NO		1 - Leve (<25%)	Vidro Fosco e Consolidação	Aspecto Redondo	Pav Mosaico	Sinal do Halo Reverso	Espessamento Brônquico			Periferico	Dois ou Mais Lobos	Bilateral	Lobo Sup Dir	Lobo Médio	Lobo Inf Dir	Lobo Sup Esq	Lobo Inf Esq					#REF!								Unico Lobo	Unilateral						NO	YES	YES	NO	NO	NO	NO	NO
199	<50	1	2020-03-12	POSITIVE FOR COVID	NO		1 - Leve (<25%)	Vidro Fosco e Consolidação	Aspecto Redondo	Pav Mosaico	Sinal do Halo Reverso	Espessamento Brônquico			Periferico	Dois ou Mais Lobos	Unilateral	Lobo Sup Dir	Lobo Médio	Lobo Inf Dir	Lobo Sup Esq	Lobo Inf Esq	YES		1 - Leve (<25%)	Vidro Fosco Pura	#REF!	Aspecto Redondo	Pav Mosaico	Sinal do Halo Reverso	Espessamento Brônquico			Periferico	Dois ou Mais Lobos	Bilateral		Lobo Médio	Lobo Inf Dir	Lobo Sup Esq	Lobo Inf Esq	NO	YES	YES	NO	YES	NO	NO	NO
200	<50	1	2020-03-14	POSITIVE FOR COVID	NO	0	1 - Leve (<25%)	Vidro Fosco Pura	Aspecto Redondo	Pav Mosaico					Periferico	Dois ou Mais Lobos	Bilateral	Lobo Sup Dir		Lobo Inf Dir	Lobo Sup Esq	Lobo Inf Esq	YES	0	1 - Leve (<25%)	Vidro Fosco Pura	#REF!	Aspecto Redondo	Pav Mosaico					Periferico	Dois ou Mais Lobos	Bilateral	Lobo Sup Dir		Lobo Inf Dir	Lobo Sup Esq	Lobo Inf Esq	NO	YES	YES	NO	NO	NO	YES	YES
201	71-80	1	2020-03-12	POSITIVE FOR COVID	YES		1 - Leve (<25%)	Vidro Fosco Pura	Aspecto Redondo	Pav Mosaico		Espessamento Brônquico			Periferico	Dois ou Mais Lobos	Bilateral	Lobo Sup Dir	Lobo Médio	Lobo Inf Dir	Lobo Sup Esq	Lobo Inf Esq	YES		1 - Leve (<25%)	Vidro Fosco Pura	#REF!	Aspecto Redondo	Pav Mosaico		Espessamento Brônquico			Periferico	Dois ou Mais Lobos	Bilateral	Lobo Sup Dir	Lobo Médio	Lobo Inf Dir	Lobo Sup Esq	Lobo Inf Esq	YES	NO	YES	NO	YES	NO	YES	NO
202	<50	1	2020-03-15	POSITIVE FOR COVID	NO	0	1 - Leve (<25%)	Vidro Fosco e Consolidação	Aspecto Redondo	Pav Mosaico	Sinal do Halo Reverso	Espessamento Brônquico			Periferico	Dois ou Mais Lobos	Bilateral	Lobo Sup Dir	Lobo Médio	Lobo Inf Dir	Lobo Sup Esq	Lobo Inf Esq	YES	0	1 - Leve (<25%)	Vidro Fosco e Consolidação	#REF!	Aspecto Redondo	Pav Mosaico	Sinal do Halo Reverso	Espessamento Brônquico			Periferico	Dois ou Mais Lobos	Bilateral	Lobo Sup Dir	Lobo Médio	Lobo Inf Dir	Lobo Sup Esq	Lobo Inf Esq	YES	YES	YES	NO	YES	NO	NO	NO
203	71-80	3	2020-03-20	POSITIVE FOR COVID	YES	4	Grave (>50%)	Vidro Fosco e Consolidação		Pav Mosaico		Espessamento Brônquico	Derrame Pleural		Central e Periferico	Dois ou Mais Lobos	Bilateral	Lobo Sup Dir	Lobo Médio	Lobo Inf Dir	Lobo Sup Esq	Lobo Inf Esq		4			#REF!								Unico Lobo	Unilateral						YES	YES	YES	NO	NO	NO	NO	NO
204	<50	2	2020-03-12	POSITIVE FOR COVID	NO	0	1 - Leve (<25%)	Vidro Fosco e Consolidação	Aspecto Redondo	Pav Mosaico		Espessamento Brônquico			Periferico	Dois ou Mais Lobos	Bilateral	Lobo Sup Dir	Lobo Médio	Lobo Inf Dir	Lobo Sup Esq	Lobo Inf Esq	YES	0	1 - Leve (<25%)	Vidro Fosco e Consolidação	#REF!	Aspecto Redondo	Pav Mosaico		Espessamento Brônquico			Periferico	Dois ou Mais Lobos	Bilateral	Lobo Sup Dir	Lobo Médio	Lobo Inf Dir	Lobo Sup Esq	Lobo Inf Esq	YES	YES	YES	NO	NO	NO	NO	YES
205	<50	1	2020-03-28	POSITIVE FOR COVID	NO	0	1 - Leve (<25%)	Vidro Fosco Pura	Aspecto Redondo			Espessamento Brônquico			Periferico	Unico Lobo	Unilateral					Lobo Inf Esq		0			#REF!								Unico Lobo	Unilateral						NO	YES	NO	NO	NO	NO	NO	NO
206	<50	1	2020-03-30	POSITIVE FOR COVID	NO		1 - Leve (<25%)	Vidro Fosco e Consolidação				Espessamento Brônquico			Central e Periferico	Dois ou Mais Lobos	Bilateral	Lobo Sup Dir		Lobo Inf Dir	Lobo Sup Esq	Lobo Inf Esq					#REF!								Unico Lobo	Unilateral						YES	YES	NO	NO	NO	NO	YES	NO
207	<50	1	2020-03-18	POSITIVE FOR COVID	NO	0	1 - Leve (<25%)	Vidro Fosco Pura	Aspecto Redondo			Espessamento Brônquico			Periferico	Unico Lobo	Unilateral					Lobo Inf Esq	Duvidosa	0	1 - Leve (<25%)	Vidro Fosco Pura	#REF!	Aspecto Redondo						Periferico	Unico Lobo	Unilateral					Lobo Inf Esq	YES	YES	NO	NO	NO	NO	NO	NO
208	71-80	2	2020-03-20	POSITIVE FOR COVID	YES	3	Grave (>50%)	Vidro Fosco e Consolidação		Pav Mosaico		Espessamento Brônquico			Central e Periferico	Dois ou Mais Lobos	Bilateral	Lobo Sup Dir	Lobo Médio	Lobo Inf Dir	Lobo Sup Esq	Lobo Inf Esq		3			#REF!								Unico Lobo	Unilateral						YES	YES	NO	NO	NO	NO	NO	NO
209	<50	1	2020-03-05	POSITIVE FOR COVID	NO	0	1 - Leve (<25%)	Vidro Fosco e Consolidação	Aspecto Redondo	Pav Mosaico	Sinal do Halo Reverso	Espessamento Brônquico			Periferico	Dois ou Mais Lobos	Bilateral	Lobo Sup Dir	Lobo Médio	Lobo Inf Dir	Lobo Sup Esq	Lobo Inf Esq	YES	0	1 - Leve (<25%)	Vidro Fosco e Consolidação	#REF!	Aspecto Redondo	Pav Mosaico	Sinal do Halo Reverso	Espessamento Brônquico			Periferico	Dois ou Mais Lobos	Bilateral	Lobo Sup Dir	Lobo Médio	Lobo Inf Dir	Lobo Sup Esq	Lobo Inf Esq	NO	YES	YES	NO	NO	NO	NO	NO
210	>80	2	2020-03-24	POSITIVE FOR COVID	YES	1	2 - Moderado (25-50%)	Vidro Fosco Pura		Pav Mosaico		Espessamento Brônquico			Central e Periferico	Dois ou Mais Lobos	Bilateral	Lobo Sup Dir	Lobo Médio	Lobo Inf Dir	Lobo Sup Esq	Lobo Inf Esq		1			#REF!								Unico Lobo	Unilateral						NO	YES	YES	YES	NO	NO	YES	NO
211	<50	1	2020-04-03	POSITIVE FOR COVID	NO	0	1 - Leve (<25%)	Vidro Fosco Pura		Pav Mosaico					Central	Unico Lobo	Unilateral	Lobo Sup Dir						0			#REF!								Unico Lobo	Unilateral						YES	NO	NO	NO	NO	YES	NO	YES
212	71-80	2	2020-03-12	POSITIVE FOR COVID	NO	0	1 - Leve (<25%)	Vidro Fosco Pura	Aspecto Redondo	Pav Mosaico					Central e Periferico	Dois ou Mais Lobos	Bilateral	Lobo Sup Dir		Lobo Inf Dir	Lobo Sup Esq	Lobo Inf Esq	YES	0	1 - Leve (<25%)	Vidro Fosco Pura	#REF!	Aspecto Redondo						Periferico	Dois ou Mais Lobos	Bilateral	Lobo Sup Dir		Lobo Inf Dir	Lobo Sup Esq	Lobo Inf Esq	YES	NO	NO	YES	YES	NO	NO	NO
213	>80	2	2020-03-13	POSITIVE FOR COVID	YES	4	2 - Moderado (25-50%)	Vidro Fosco e Consolidação	Aspecto Redondo	Pav Mosaico	Sinal do Halo Reverso	Espessamento Brônquico			Central e Periferico	Dois ou Mais Lobos	Bilateral	Lobo Sup Dir	Lobo Médio	Lobo Inf Dir	Lobo Sup Esq	Lobo Inf Esq		4			#REF!								Unico Lobo	Unilateral						YES	NO	YES	NO	NO	NO	YES	NO
214	<50	1	2020-03-19	POSITIVE FOR COVID	NO	3	1 - Leve (<25%)	Vidro Fosco e Consolidação		Pav Mosaico					Periferico	Dois ou Mais Lobos	Bilateral			Lobo Inf Dir	Lobo Sup Esq	Lobo Inf Esq	YES	3	1 - Leve (<25%)	Vidro Fosco e Consolidação	#REF!		Pav Mosaico					Periferico	Dois ou Mais Lobos	Bilateral			Lobo Inf Dir	Lobo Sup Esq	Lobo Inf Esq	NO	YES	NO	YES	YES	NO	NO	NO
215	61-70	2	2020-03-23	POSITIVE FOR COVID	NO		2 - Moderado (25-50%)	Vidro Fosco e Consolidação	Aspecto Redondo	Pav Mosaico	Sinal do Halo Reverso	Espessamento Brônquico			Central e Periferico	Dois ou Mais Lobos	Bilateral	Lobo Sup Dir	Lobo Médio	Lobo Inf Dir	Lobo Sup Esq	Lobo Inf Esq					#REF!								Unico Lobo	Unilateral						NO	YES	YES	YES	NO	NO	NO	NO
216	<50	1	2020-03-26	POSITIVE FOR COVID	NO	0	1 - Leve (<25%)	Vidro Fosco e Consolidação	Aspecto Redondo	Pav Mosaico		Espessamento Brônquico			Central e Periferico	Dois ou Mais Lobos	Bilateral	Lobo Sup Dir	Lobo Médio	Lobo Inf Dir		Lobo Inf Esq		0			#REF!								Unico Lobo	Unilateral						NO	NO	YES	NO	YES	NO	YES	NO
217	>80	2	2020-03-12	POSITIVE FOR COVID	NO		1 - Leve (<25%)	Vidro Fosco e Consolidação		Pav Mosaico		Espessamento Brônquico	Derrame Pleural		Central e Periferico	Dois ou Mais Lobos	Bilateral	Lobo Sup Dir	Lobo Médio	Lobo Inf Dir	Lobo Sup Esq	Lobo Inf Esq	Duvidosa		1 - Leve (<25%)	Vidro Fosco e Consolidação	#REF!		Pav Mosaico		Espessamento Brônquico	Derrame Pleural		Central e Periferico	Dois ou Mais Lobos	Bilateral	Lobo Sup Dir	Lobo Médio	Lobo Inf Dir	Lobo Sup Esq	Lobo Inf Esq	NO	YES	NO	NO	NO	YES	NO	NO
218	61-70	3	2020-03-06	POSITIVE FOR COVID	NO	1	1 - Leve (<25%)	Vidro Fosco Pura	Aspecto Redondo	Pav Mosaico		Espessamento Brônquico			Periferico	Dois ou Mais Lobos	Bilateral	Lobo Sup Dir	Lobo Médio	Lobo Inf Dir	Lobo Sup Esq	Lobo Inf Esq	YES	1	1 - Leve (<25%)	Vidro Fosco Pura	#REF!	Aspecto Redondo	Pav Mosaico		Espessamento Brônquico			Periferico	Dois ou Mais Lobos	Bilateral	Lobo Sup Dir	Lobo Médio	Lobo Inf Dir	Lobo Sup Esq	Lobo Inf Esq	YES	YES	YES	NO	NO	YES	YES	NO
219	>80	1	2020-03-15	POSITIVE FOR COVID	YES		Grave (>50%)	Vidro Fosco e Consolidação		Pav Mosaico					Central e Periferico	Dois ou Mais Lobos	Bilateral	Lobo Sup Dir	Lobo Médio	Lobo Inf Dir	Lobo Sup Esq	Lobo Inf Esq					#REF!								Unico Lobo	Unilateral						NO	NO	YES	YES	NO	NO	YES	YES
220	>80	2	2020-03-16	POSITIVE FOR COVID	YES		Grave (>50%)	Vidro Fosco e Consolidação		Pav Mosaico	Sinal do Halo Reverso	Espessamento Brônquico		LinfadeNOmegalia	Central e Periferico	Dois ou Mais Lobos	Bilateral	Lobo Sup Dir	Lobo Médio	Lobo Inf Dir	Lobo Sup Esq	Lobo Inf Esq	YES		Grave (>50%)	Vidro Fosco e Consolidação	#REF!		Pav Mosaico		Espessamento Brônquico			Central e Periferico	Dois ou Mais Lobos	Bilateral	Lobo Sup Dir	Lobo Médio	Lobo Inf Dir	Lobo Sup Esq	Lobo Inf Esq	YES	NO	NO	NO	NO	NO	NO	NO
221	>80	2	2020-03-27	POSITIVE FOR COVID	NO		2 - Moderado (25-50%)	Vidro Fosco e Consolidação		Pav Mosaico		Espessamento Brônquico			Central e Periferico	Dois ou Mais Lobos	Bilateral	Lobo Sup Dir	Lobo Médio	Lobo Inf Dir	Lobo Sup Esq	Lobo Inf Esq					#REF!								Unico Lobo	Unilateral						YES	NO	NO	NO	NO	NO	NO	NO
222	71-80	3	2020-03-21	POSITIVE FOR COVID	NO		Grave (>50%)	Vidro Fosco Pura		Pav Mosaico		Espessamento Brônquico			Central e Periferico	Dois ou Mais Lobos	Bilateral	Lobo Sup Dir	Lobo Médio	Lobo Inf Dir	Lobo Sup Esq	Lobo Inf Esq					#REF!								Unico Lobo	Unilateral						YES	NO	YES	YES	NO	NO	YES	YES
223	>80	2	2020-03-13	POSITIVE FOR COVID	YES	5	2 - Moderado (25-50%)	Vidro Fosco Pura		Pav Mosaico					Central e Periferico	Dois ou Mais Lobos	Bilateral	Lobo Sup Dir	Lobo Médio	Lobo Inf Dir	Lobo Sup Esq	Lobo Inf Esq	YES	5	2 - Moderado (25-50%)	Vidro Fosco Pura	#REF!		Pav Mosaico					Central e Periferico	Dois ou Mais Lobos	Bilateral	Lobo Sup Dir	Lobo Médio	Lobo Inf Dir	Lobo Sup Esq	Lobo Inf Esq	YES	YES	NO	NO	NO	NO	YES	YES
224	<50	1	2020-03-31	POSITIVE FOR COVID	NO	0	Não Se Aplica	Ausência de Opacidades				Espessamento Brônquico			Ausência de Opacidades									0			#REF!								Unico Lobo	Unilateral						NO	NO	NO	NO	NO	NO	NO	NO
225	<50	1	2020-03-27	POSITIVE FOR COVID	NO	0	1 - Leve (<25%)	Vidro Fosco e Consolidação	Aspecto Redondo			Espessamento Brônquico			Periferico	Unico Lobo	Unilateral				Lobo Sup Esq			0			#REF!								Unico Lobo	Unilateral						NO	NO	YES	NO	NO	NO	NO	NO
226	71-80	3	2020-03-18	POSITIVE FOR COVID	NO	2	Grave (>50%)	Vidro Fosco e Consolidação		Pav Mosaico		Espessamento Brônquico			Central e Periferico	Dois ou Mais Lobos	Bilateral	Lobo Sup Dir	Lobo Médio	Lobo Inf Dir	Lobo Sup Esq	Lobo Inf Esq	YES	2	Grave (>50%)	Vidro Fosco e Consolidação	#REF!	Aspecto Redondo	Pav Mosaico		Espessamento Brônquico			Central e Periferico	Dois ou Mais Lobos	Bilateral	Lobo Sup Dir	Lobo Médio	Lobo Inf Dir	Lobo Sup Esq	Lobo Inf Esq	YES	NO	YES	NO	NO	NO	NO	NO
227	61-70	3	2020-03-27	POSITIVE FOR COVID	YES		1 - Leve (<25%)	Vidro Fosco Pura	Aspecto Redondo	Pav Mosaico					Central e Periferico	Dois ou Mais Lobos	Bilateral			Lobo Inf Dir	Lobo Sup Esq	Lobo Inf Esq					#REF!								Unico Lobo	Unilateral						NO	YES	YES	NO	NO	NO	YES	NO
228	>80	2	2020-03-28	POSITIVE FOR COVID	YES	0	2 - Moderado (25-50%)	Vidro Fosco Pura	Aspecto Redondo	Pav Mosaico		Espessamento Brônquico			Central e Periferico	Dois ou Mais Lobos	Bilateral	Lobo Sup Dir	Lobo Médio	Lobo Inf Dir	Lobo Sup Esq	Lobo Inf Esq		0			#REF!								Unico Lobo	Unilateral						NO	YES	NO	YES	NO	NO	NO	NO
229	<50	1	2020-03-21	POSITIVE FOR COVID	NO		Não Se Aplica	Ausência de Opacidades				Espessamento Brônquico			Ausência de Opacidades								Não		Não Se Aplica	Ausência de Opacidades	#REF!				Espessamento Brônquico			Ausência de Opacidades								NO	YES	YES	NO	NO	NO	NO	NO
230	61-70	1	2020-03-10	POSITIVE FOR COVID	NO		2 - Moderado (25-50%)	Vidro Fosco Pura	Aspecto Redondo	Pav Mosaico					Central e Periferico	Dois ou Mais Lobos	Bilateral	Lobo Sup Dir	Lobo Médio	Lobo Inf Dir	Lobo Sup Esq	Lobo Inf Esq	YES		2 - Moderado (25-50%)	Vidro Fosco Pura	#REF!	Aspecto Redondo	Pav Mosaico					Central e Periferico	Dois ou Mais Lobos	Bilateral	Lobo Sup Dir	Lobo Médio	Lobo Inf Dir	Lobo Sup Esq	Lobo Inf Esq	YES	YES	YES	NO	NO	NO	NO	NO
231	51-60	2	2020-03-15	POSITIVE FOR COVID	NO	1	2 - Moderado (25-50%)	Vidro Fosco Pura		Pav Mosaico					Central e Periferico	Dois ou Mais Lobos	Bilateral	Lobo Sup Dir	Lobo Médio	Lobo Inf Dir	Lobo Sup Esq	Lobo Inf Esq	YES	1	2 - Moderado (25-50%)	Vidro Fosco e Consolidação	#REF!		Pav Mosaico	Sinal do Halo Reverso				Central e Periferico	Dois ou Mais Lobos	Bilateral	Lobo Sup Dir	Lobo Médio	Lobo Inf Dir	Lobo Sup Esq	Lobo Inf Esq	YES	YES	YES	NO	NO	NO	NO	NO
232	51-60	3	2020-03-24	POSITIVE FOR COVID	NO		Grave (>50%)	Vidro Fosco e Consolidação	Aspecto Redondo	Pav Mosaico	Sinal do Halo Reverso	Espessamento Brônquico			Central e Periferico	Dois ou Mais Lobos	Bilateral	Lobo Sup Dir	Lobo Médio	Lobo Inf Dir	Lobo Sup Esq	Lobo Inf Esq	YES		Grave (>50%)	Vidro Fosco e Consolidação	#REF!	Aspecto Redondo	Pav Mosaico		Espessamento Brônquico			Central e Periferico	Dois ou Mais Lobos	Bilateral	Lobo Sup Dir	Lobo Médio	Lobo Inf Dir	Lobo Sup Esq	Lobo Inf Esq	YES	NO	NO	NO	NO	NO	NO	NO
233	61-70	2	2020-03-17	POSITIVE FOR COVID	NO		1 - Leve (<25%)	Vidro Fosco e Consolidação	Aspecto Redondo	Pav Mosaico		Espessamento Brônquico			Periferico	Dois ou Mais Lobos	Bilateral	Lobo Sup Dir	Lobo Médio	Lobo Inf Dir	Lobo Sup Esq	Lobo Inf Esq					#REF!								Unico Lobo	Unilateral						NO	YES	NO	YES	NO	YES	NO	NO
234	61-70	3	2020-03-29	POSITIVE FOR COVID	NO	3	Grave (>50%)	Vidro Fosco e Consolidação	Aspecto Redondo	Pav Mosaico	Sinal do Halo Reverso	Espessamento Brônquico			Central e Periferico	Dois ou Mais Lobos	Bilateral	Lobo Sup Dir	Lobo Médio	Lobo Inf Dir	Lobo Sup Esq	Lobo Inf Esq		3			#REF!								Unico Lobo	Unilateral						NO	YES	NO	YES	NO	NO	YES	NO
235	51-60	1	2020-03-16	POSITIVE FOR COVID	NO	0	Não Se Aplica	Ausência de Opacidades				Espessamento Brônquico			Ausência de Opacidades								Não	0	NOrmal	Ausência de Opacidades	#REF!							Ausência de Opacidades								NO	YES	YES	NO	YES	NO	NO	NO
236	61-70	1	2020-03-29	POSITIVE FOR COVID	NO		1 - Leve (<25%)	Vidro Fosco Pura	Aspecto Redondo	Pav Mosaico		Espessamento Brônquico			Central e Periferico	Dois ou Mais Lobos	Bilateral	Lobo Sup Dir		Lobo Inf Dir	Lobo Sup Esq	Lobo Inf Esq					#REF!								Unico Lobo	Unilateral						YES	YES	NO	NO	NO	NO	NO	NO
237	51-60	3	2020-03-23	POSITIVE FOR COVID	YES	1	Grave (>50%)	Vidro Fosco Pura		Pav Mosaico		Espessamento Brônquico			Central e Periferico	Dois ou Mais Lobos	Bilateral	Lobo Sup Dir	Lobo Médio	Lobo Inf Dir	Lobo Sup Esq	Lobo Inf Esq		1			#REF!								Unico Lobo	Unilateral						YES	YES	YES	NO	NO	NO	NO	NO
238	71-80	2	2020-03-22	POSITIVE FOR COVID	YES	1	2 - Moderado (25-50%)	Vidro Fosco Pura		Pav Mosaico	Sinal do Halo Reverso	Espessamento Brônquico			Periferico	Dois ou Mais Lobos	Bilateral	Lobo Sup Dir	Lobo Médio	Lobo Inf Dir	Lobo Sup Esq	Lobo Inf Esq		1			#REF!								Unico Lobo	Unilateral						NO	YES	YES	NO	YES	NO	NO	NO
239	61-70	3	2020-03-30	POSITIVE FOR COVID	YES	3	2 - Moderado (25-50%)	Vidro Fosco Pura	Aspecto Redondo	Pav Mosaico	Sinal do Halo Reverso	Espessamento Brônquico			Central e Periferico	Dois ou Mais Lobos	Bilateral	Lobo Sup Dir	Lobo Médio	Lobo Inf Dir	Lobo Sup Esq	Lobo Inf Esq		3			#REF!								Unico Lobo	Unilateral						YES	NO	YES	NO	YES	NO	NO	NO
240	61-70	3	2020-03-23	POSITIVE FOR COVID	YES	3	Grave (>50%)	Vidro Fosco e Consolidação	Aspecto Redondo	Pav Mosaico	Sinal do Halo Reverso	Espessamento Brônquico			Central e Periferico	Dois ou Mais Lobos	Bilateral	Lobo Sup Dir	Lobo Médio	Lobo Inf Dir	Lobo Sup Esq	Lobo Inf Esq		3			#REF!								Unico Lobo	Unilateral						YES	YES	YES	YES	NO	NO	NO	NO
241	51-60	2	2020-03-25	POSITIVE FOR COVID	NO		1 - Leve (<25%)	Vidro Fosco Pura	Aspecto Redondo	Pav Mosaico					Periferico	Dois ou Mais Lobos	Bilateral	Lobo Sup Dir	Lobo Médio	Lobo Inf Dir	Lobo Sup Esq	Lobo Inf Esq					#REF!								Unico Lobo	Unilateral						NO	YES	YES	NO	NO	NO	NO	YES
242	61-70	2	2020-03-18	POSITIVE FOR COVID	NO	1	2 - Moderado (25-50%)	Vidro Fosco e Consolidação	Aspecto Redondo	Pav Mosaico					Central e Periferico	Dois ou Mais Lobos	Bilateral	Lobo Sup Dir	Lobo Médio	Lobo Inf Dir	Lobo Sup Esq	Lobo Inf Esq	YES	1	2 - Moderado (25-50%)	Vidro Fosco e Consolidação	#REF!	Aspecto Redondo	Pav Mosaico					Central e Periferico	Dois ou Mais Lobos	Bilateral	Lobo Sup Dir	Lobo Médio	Lobo Inf Dir	Lobo Sup Esq	Lobo Inf Esq	NO	YES	NO	YES	NO	NO	NO	NO
243	>80	3	2020-03-25	POSITIVE FOR COVID	YES		1 - Leve (<25%)	Vidro Fosco e Consolidação	Aspecto Redondo	Pav Mosaico		Espessamento Brônquico			Periferico	Dois ou Mais Lobos	Bilateral	Lobo Sup Dir	Lobo Médio	Lobo Inf Dir	Lobo Sup Esq	Lobo Inf Esq					#REF!								Unico Lobo	Unilateral						YES	YES	NO	NO	NO	NO	NO	NO
244	<50	1	2020-03-29	POSITIVE FOR COVID	NO		1 - Leve (<25%)	Vidro Fosco Pura	Aspecto Redondo	Pav Mosaico		Espessamento Brônquico			Periferico	Dois ou Mais Lobos	Bilateral			Lobo Inf Dir	Lobo Sup Esq						#REF!								Unico Lobo	Unilateral						YES	NO	YES	NO	NO	YES	NO	NO
245	<50	1	2020-03-13	POSITIVE FOR COVID	NO	0	1 - Leve (<25%)	Vidro Fosco e Consolidação	Aspecto Redondo	Pav Mosaico	Sinal do Halo Reverso	Espessamento Brônquico			Periferico	Dois ou Mais Lobos	Bilateral	Lobo Sup Dir	Lobo Médio	Lobo Inf Dir	Lobo Sup Esq	Lobo Inf Esq	YES	0	1 - Leve (<25%)	Vidro Fosco e Consolidação	#REF!	Aspecto Redondo	Pav Mosaico	Sinal do Halo Reverso	Espessamento Brônquico			Periferico	Dois ou Mais Lobos	Bilateral	Lobo Sup Dir	Lobo Médio	Lobo Inf Dir	Lobo Sup Esq	Lobo Inf Esq	NO	YES	YES	YES	NO	NO	NO	YES
246	<50	1	2020-03-26	POSITIVE FOR COVID	NO	3	1 - Leve (<25%)	Vidro Fosco e Consolidação	Aspecto Redondo	Pav Mosaico		Espessamento Brônquico			Periferico	Dois ou Mais Lobos	Bilateral			Lobo Inf Dir		Lobo Inf Esq		3			#REF!								Unico Lobo	Unilateral						NO	NO	YES	NO	YES	NO	NO	NO
247	61-70	2	2020-03-23	POSITIVE FOR COVID	YES		2 - Moderado (25-50%)	Vidro Fosco e Consolidação		Pav Mosaico		Espessamento Brônquico			Central e Periferico	Dois ou Mais Lobos	Bilateral	Lobo Sup Dir	Lobo Médio	Lobo Inf Dir	Lobo Sup Esq	Lobo Inf Esq	YES		Grave (>50%)	Vidro Fosco e Consolidação	#REF!		Pav Mosaico		Espessamento Brônquico			Central e Periferico	Dois ou Mais Lobos	Bilateral	Lobo Sup Dir	Lobo Médio	Lobo Inf Dir	Lobo Sup Esq	Lobo Inf Esq	NO	NO	YES	NO	NO	NO	NO	NO
248	<50	1	2020-03-09	POSITIVE FOR COVID	NO	0	NOrmal	Ausência de Opacidades							Ausência de Opacidades								Não	0	NOrmal	Ausência de Opacidades	#REF!							Ausência de Opacidades								YES	YES	YES	NO	YES	NO	NO	NO
249	>80	3	2020-03-23	POSITIVE FOR COVID	YES		Grave (>50%)	Vidro Fosco e Consolidação		Pav Mosaico		Espessamento Brônquico	Derrame Pleural		Central e Periferico	Dois ou Mais Lobos	Bilateral	Lobo Sup Dir	Lobo Médio	Lobo Inf Dir	Lobo Sup Esq	Lobo Inf Esq					#REF!								Unico Lobo	Unilateral						NO	YES	NO	NO	NO	NO	NO	YES
250	61-70	2	2020-03-16	POSITIVE FOR COVID	YES		2 - Moderado (25-50%)	Vidro Fosco Pura		Pav Mosaico		Espessamento Brônquico			Central e Periferico	Dois ou Mais Lobos	Bilateral	Lobo Sup Dir	Lobo Médio	Lobo Inf Dir	Lobo Sup Esq	Lobo Inf Esq	YES		2 - Moderado (25-50%)	Vidro Fosco Pura	#REF!		Pav Mosaico					Central e Periferico	Dois ou Mais Lobos	Bilateral	Lobo Sup Dir	Lobo Médio	Lobo Inf Dir	Lobo Sup Esq	Lobo Inf Esq	NO	YES	YES	NO	YES	NO	NO	NO
251	<50	1	2020-03-25	POSITIVE FOR COVID	NO	0	1 - Leve (<25%)	Vidro Fosco Pura	Aspecto Redondo	Pav Mosaico					Periferico	Dois ou Mais Lobos	Unilateral		Lobo Médio	Lobo Inf Dir				0			#REF!								Unico Lobo	Unilateral						YES	NO	YES	NO	NO	YES	NO	NO
252	71-80	2	2020-03-24	POSITIVE FOR COVID	YES	0	1 - Leve (<25%)	Vidro Fosco Pura	Aspecto Redondo	Pav Mosaico		Espessamento Brônquico			Central e Periferico	Dois ou Mais Lobos	Bilateral	Lobo Sup Dir	Lobo Médio	Lobo Inf Dir	Lobo Sup Esq	Lobo Inf Esq	YES	0	1 - Leve (<25%)	Vidro Fosco Pura	#REF!	Aspecto Redondo	Pav Mosaico		Espessamento Brônquico			Central e Periferico	Dois ou Mais Lobos	Bilateral	Lobo Sup Dir	Lobo Médio	Lobo Inf Dir	Lobo Sup Esq	Lobo Inf Esq	NO	YES	YES	NO	NO	NO	YES	YES
253	61-70	3	2020-03-23	POSITIVE FOR COVID	YES		Grave (>50%)	Vidro Fosco e Consolidação		Pav Mosaico		Espessamento Brônquico			Central e Periferico	Dois ou Mais Lobos	Bilateral	Lobo Sup Dir	Lobo Médio	Lobo Inf Dir	Lobo Sup Esq	Lobo Inf Esq					#REF!								Unico Lobo	Unilateral						NO	YES	YES	NO	NO	NO	YES	YES
254	>80	1	2020-04-03	POSITIVE FOR COVID	YES	1	2 - Moderado (25-50%)	Vidro Fosco Pura		Pav Mosaico		Espessamento Brônquico			Central e Periferico	Dois ou Mais Lobos	Bilateral	Lobo Sup Dir	Lobo Médio	Lobo Inf Dir	Lobo Sup Esq	Lobo Inf Esq		1			#REF!								Unico Lobo	Unilateral						YES	YES	YES	NO	NO	NO	NO	NO
255	<50	1	2020-03-07	POSITIVE FOR COVID	NO	0	1 - Leve (<25%)	Vidro Fosco Pura	Aspecto Redondo	Pav Mosaico					Periferico	Dois ou Mais Lobos	Bilateral	Lobo Sup Dir	Lobo Médio	Lobo Inf Dir	Lobo Sup Esq	Lobo Inf Esq	YES	0	1 - Leve (<25%)	Vidro Fosco Pura	#REF!	Aspecto Redondo	Pav Mosaico					Periferico	Dois ou Mais Lobos	Bilateral	Lobo Sup Dir	Lobo Médio	Lobo Inf Dir	Lobo Sup Esq	Lobo Inf Esq	NO	YES	NO	NO	YES	YES	NO	NO
256	<50	1	2020-03-29	POSITIVE FOR COVID	NO	0	NOrmal	Ausência de Opacidades							Ausência de Opacidades									0			#REF!								Unico Lobo	Unilateral						NO	YES	YES	NO	NO	NO	NO	NO
257	71-80	1	2020-03-29	POSITIVE FOR COVID	YES	4	1 - Leve (<25%)	Vidro Fosco e Consolidação		Pav Mosaico		Espessamento Brônquico			Central e Periferico	Dois ou Mais Lobos	Bilateral		Lobo Médio	Lobo Inf Dir	Lobo Sup Esq	Lobo Inf Esq		4			#REF!								Unico Lobo	Unilateral						NO	YES	YES	NO	NO	YES	YES	YES
258	71-80	2	2020-03-14	POSITIVE FOR COVID	YES	1	2 - Moderado (25-50%)	Vidro Fosco e Consolidação		Pav Mosaico		Espessamento Brônquico			Central e Periferico	Dois ou Mais Lobos	Bilateral	Lobo Sup Dir	Lobo Médio	Lobo Inf Dir	Lobo Sup Esq	Lobo Inf Esq	YES	1	2 - Moderado (25-50%)	Vidro Fosco Pura	#REF!		Pav Mosaico					Central e Periferico	Dois ou Mais Lobos	Bilateral	Lobo Sup Dir	Lobo Médio	Lobo Inf Dir	Lobo Sup Esq	Lobo Inf Esq	NO	NO	YES	NO	NO	NO	YES	NO
259	>80	2	2020-03-24	POSITIVE FOR COVID	YES	0	Grave (>50%)	Vidro Fosco e Consolidação		Pav Mosaico		Espessamento Brônquico			Central e Periferico	Dois ou Mais Lobos	Bilateral	Lobo Sup Dir	Lobo Médio	Lobo Inf Dir	Lobo Sup Esq	Lobo Inf Esq	YES	0	Grave (>50%)	Vidro Fosco e Consolidação	#REF!		Pav Mosaico		Espessamento Brônquico			Central e Periferico	Dois ou Mais Lobos	Bilateral	Lobo Sup Dir	Lobo Médio	Lobo Inf Dir	Lobo Sup Esq	Lobo Inf Esq	NO	YES	NO	NO	NO	NO	YES	NO
260	>80	2	2020-03-10	POSITIVE FOR COVID	NO	0	1 - Leve (<25%)	Vidro Fosco e Consolidação	Aspecto Redondo	Pav Mosaico		Espessamento Brônquico			Periferico	Dois ou Mais Lobos	Bilateral	Lobo Sup Dir	Lobo Médio	Lobo Inf Dir	Lobo Sup Esq	Lobo Inf Esq	YES	0	1 - Leve (<25%)	Vidro Fosco Pura	#REF!	Aspecto Redondo	Pav Mosaico	Sinal do Halo Reverso	Espessamento Brônquico			Periferico	Dois ou Mais Lobos	Bilateral	Lobo Sup Dir	Lobo Médio	Lobo Inf Dir	Lobo Sup Esq	Lobo Inf Esq	YES	NO	NO	NO	YES	NO	NO	NO
261	61-70	3	2020-03-13	POSITIVE FOR COVID	NO	1	Grave (>50%)	Vidro Fosco Pura		Pav Mosaico		Espessamento Brônquico			Central e Periferico	Dois ou Mais Lobos	Bilateral	Lobo Sup Dir	Lobo Médio	Lobo Inf Dir	Lobo Sup Esq	Lobo Inf Esq	YES	1	Grave (>50%)	Vidro Fosco Pura	#REF!		Pav Mosaico		Espessamento Brônquico			Central e Periferico	Dois ou Mais Lobos	Bilateral	Lobo Sup Dir	Lobo Médio	Lobo Inf Dir	Lobo Sup Esq	Lobo Inf Esq	YES	NO	NO	YES	NO	NO	NO	YES
262	>80	2	2020-03-13	POSITIVE FOR COVID	YES	0	1 - Leve (<25%)	Vidro Fosco Pura		Pav Mosaico		Espessamento Brônquico			Central e Periferico	Dois ou Mais Lobos	Bilateral	Lobo Sup Dir	Lobo Médio	Lobo Inf Dir	Lobo Sup Esq	Lobo Inf Esq	YES	0	2 - Moderado (25-50%)	Vidro Fosco Pura	#REF!		Pav Mosaico		Espessamento Brônquico			Central e Periferico	Dois ou Mais Lobos	Bilateral	Lobo Sup Dir	Lobo Médio	Lobo Inf Dir	Lobo Sup Esq	Lobo Inf Esq	YES	NO	YES	NO	NO	NO	NO	NO
263	>80	2	2020-03-25	POSITIVE FOR COVID	YES		1 - Leve (<25%)	Vidro Fosco e Consolidação	Aspecto Redondo	Pav Mosaico	Sinal do Halo Reverso	Espessamento Brônquico			Central e Periferico	Dois ou Mais Lobos	Bilateral	Lobo Sup Dir	Lobo Médio	Lobo Inf Dir	Lobo Sup Esq	Lobo Inf Esq					#REF!								Unico Lobo	Unilateral						NO	YES	YES	NO	NO	NO	NO	NO
264	>80	2	2020-03-21	POSITIVE FOR COVID	YES	4	2 - Moderado (25-50%)	Vidro Fosco e Consolidação	Aspecto Redondo	Pav Mosaico	Sinal do Halo Reverso	Espessamento Brônquico	Derrame Pleural		Central e Periferico	Dois ou Mais Lobos	Bilateral	Lobo Sup Dir	Lobo Médio	Lobo Inf Dir	Lobo Sup Esq	Lobo Inf Esq		4			#REF!								Unico Lobo	Unilateral						YES	YES	NO	NO	NO	NO	NO	NO
265	61-70	1	2020-04-01	POSITIVE FOR COVID	NO	5	1 - Leve (<25%)	Vidro Fosco Pura	Aspecto Redondo	Pav Mosaico		Espessamento Brônquico			Periferico	Dois ou Mais Lobos	Bilateral	Lobo Sup Dir	Lobo Médio	Lobo Inf Dir	Lobo Sup Esq	Lobo Inf Esq		5			#REF!								Unico Lobo	Unilateral						YES	YES	YES	YES	NO	NO	NO	NO
266	71-80	3	2020-03-23	POSITIVE FOR COVID	YES		2 - Moderado (25-50%)	Vidro Fosco e Consolidação	Aspecto Redondo	Pav Mosaico		Espessamento Brônquico			Central e Periferico	Dois ou Mais Lobos	Bilateral	Lobo Sup Dir	Lobo Médio	Lobo Inf Dir	Lobo Sup Esq	Lobo Inf Esq	YES		2 - Moderado (25-50%)	Vidro Fosco e Consolidação	#REF!		Pav Mosaico		Espessamento Brônquico			Central e Periferico	Dois ou Mais Lobos	Bilateral	Lobo Sup Dir	Lobo Médio	Lobo Inf Dir	Lobo Sup Esq	Lobo Inf Esq	NO	NO	NO	NO	NO	NO	NO	NO
267	71-80	1	2020-03-18	POSITIVE FOR COVID	YES	2	1 - Leve (<25%)	Vidro Fosco Pura		Pav Mosaico					Periferico	Dois ou Mais Lobos	Bilateral	Lobo Sup Dir	Lobo Médio	Lobo Inf Dir	Lobo Sup Esq	Lobo Inf Esq	YES	2	1 - Leve (<25%)	Vidro Fosco Pura	#REF!		Pav Mosaico					Periferico	Dois ou Mais Lobos	Bilateral	Lobo Sup Dir	Lobo Médio	Lobo Inf Dir	Lobo Sup Esq	Lobo Inf Esq	YES	NO	YES	NO	NO	NO	NO	NO
268	71-80	1	2020-03-14	POSITIVE FOR COVID	NO		1 - Leve (<25%)	Vidro Fosco Pura	Aspecto Redondo	Pav Mosaico					Central e Periferico	Dois ou Mais Lobos	Bilateral	Lobo Sup Dir	Lobo Médio	Lobo Inf Dir	Lobo Sup Esq	Lobo Inf Esq	YES		1 - Leve (<25%)	Vidro Fosco Pura	#REF!	Aspecto Redondo	Pav Mosaico					Central e Periferico	Dois ou Mais Lobos	Bilateral	Lobo Sup Dir	Lobo Médio	Lobo Inf Dir	Lobo Sup Esq	Lobo Inf Esq	YES	NO	YES	NO	NO	NO	NO	NO
269	>80	3	2020-03-20	POSITIVE FOR COVID	YES	4	Grave (>50%)	Vidro Fosco e Consolidação		Pav Mosaico	Sinal do Halo Reverso				Central e Periferico	Dois ou Mais Lobos	Bilateral	Lobo Sup Dir	Lobo Médio	Lobo Inf Dir	Lobo Sup Esq	Lobo Inf Esq	YES	4	Grave (>50%)	Vidro Fosco e Consolidação	#REF!		Pav Mosaico	Sinal do Halo Reverso		Derrame Pleural		Central e Periferico	Dois ou Mais Lobos	Bilateral	Lobo Sup Dir	Lobo Médio	Lobo Inf Dir	Lobo Sup Esq	Lobo Inf Esq	YES	YES	YES	NO	NO	NO	NO	NO
270	71-80	3	2020-03-11	POSITIVE FOR COVID	YES	0	2 - Moderado (25-50%)	Vidro Fosco e Consolidação	Aspecto Redondo	Pav Mosaico	Sinal do Halo Reverso	Espessamento Brônquico			Central e Periferico	Dois ou Mais Lobos	Bilateral	Lobo Sup Dir	Lobo Médio	Lobo Inf Dir	Lobo Sup Esq	Lobo Inf Esq	YES	0	2 - Moderado (25-50%)	Vidro Fosco e Consolidação	#REF!	Aspecto Redondo	Pav Mosaico	Sinal do Halo Reverso				Central e Periferico	Dois ou Mais Lobos	Bilateral	Lobo Sup Dir	Lobo Médio	Lobo Inf Dir	Lobo Sup Esq	Lobo Inf Esq	YES	NO	YES	NO	NO	NO	NO	NO
271	>80	2	2020-03-25	POSITIVE FOR COVID	NO	3	2 - Moderado (25-50%)	Vidro Fosco e Consolidação	Aspecto Redondo	Pav Mosaico		Espessamento Brônquico			Central e Periferico	Dois ou Mais Lobos	Bilateral	Lobo Sup Dir	Lobo Médio	Lobo Inf Dir	Lobo Sup Esq	Lobo Inf Esq		3			#REF!								Unico Lobo	Unilateral						YES	YES	YES	NO	NO	NO	NO	NO
272	>80	1	2020-03-13	POSITIVE FOR COVID	NO		2 - Moderado (25-50%)	Vidro Fosco e Consolidação	Aspecto Redondo	Pav Mosaico	Sinal do Halo Reverso	Espessamento Brônquico			Central e Periferico	Dois ou Mais Lobos	Bilateral	Lobo Sup Dir	Lobo Médio	Lobo Inf Dir	Lobo Sup Esq	Lobo Inf Esq	YES		2 - Moderado (25-50%)	Vidro Fosco e Consolidação	#REF!	Aspecto Redondo	Pav Mosaico	Sinal do Halo Reverso	Espessamento Brônquico			Central e Periferico	Dois ou Mais Lobos	Bilateral	Lobo Sup Dir	Lobo Médio	Lobo Inf Dir	Lobo Sup Esq	Lobo Inf Esq	YES	NO	YES	YES	NO	NO	NO	NO
273	71-80	2	2020-03-18	POSITIVE FOR COVID	YES	0	1 - Leve (<25%)	Vidro Fosco Pura	Aspecto Redondo	Pav Mosaico					Central e Periferico	Dois ou Mais Lobos	Bilateral	Lobo Sup Dir	Lobo Médio	Lobo Inf Dir	Lobo Sup Esq	Lobo Inf Esq	YES	0	1 - Leve (<25%)	Vidro Fosco Pura	#REF!	Aspecto Redondo	Pav Mosaico					Central e Periferico	Dois ou Mais Lobos	Bilateral	Lobo Sup Dir	Lobo Médio	Lobo Inf Dir	Lobo Sup Esq	Lobo Inf Esq	NO	NO	NO	YES	YES	NO	NO	YES
274	<50	1	2020-04-01	POSITIVE FOR COVID	NO	0	Não Se Aplica	Ausência de Opacidades				Espessamento Brônquico			Ausência de Opacidades									0			#REF!								Unico Lobo	Unilateral						YES	NO	NO	NO	NO	NO	NO	NO
275	71-80	1	2020-03-17	POSITIVE FOR COVID	YES	3	1 - Leve (<25%)	Vidro Fosco Pura	Aspecto Redondo	Pav Mosaico		Espessamento Brônquico			Central e Periferico	Dois ou Mais Lobos	Bilateral	Lobo Sup Dir	Lobo Médio	Lobo Inf Dir	Lobo Sup Esq	Lobo Inf Esq		3			#REF!								Unico Lobo	Unilateral						NO	YES	NO	NO	NO	NO	NO	NO
276	>80	2	2020-03-28	POSITIVE FOR COVID	YES		2 - Moderado (25-50%)	Vidro Fosco e Consolidação		Pav Mosaico		Espessamento Brônquico	Derrame Pleural		Central e Periferico	Dois ou Mais Lobos	Bilateral	Lobo Sup Dir	Lobo Médio	Lobo Inf Dir		Lobo Inf Esq					#REF!								Unico Lobo	Unilateral						YES	NO	YES	NO	NO	NO	NO	NO
277	61-70	3	2020-04-01	POSITIVE FOR COVID	NO	4	Grave (>50%)	Vidro Fosco e Consolidação		Pav Mosaico		Espessamento Brônquico			Central e Periferico	Dois ou Mais Lobos	Bilateral	Lobo Sup Dir	Lobo Médio	Lobo Inf Dir	Lobo Sup Esq	Lobo Inf Esq		4			#REF!								Unico Lobo	Unilateral						YES	NO	NO	NO	NO	NO	NO	NO
278	71-80	1	2020-03-28	POSITIVE FOR COVID	NO		1 - Leve (<25%)	Vidro Fosco e Consolidação	Aspecto Redondo	Pav Mosaico		Espessamento Brônquico			Periferico	Dois ou Mais Lobos	Bilateral	Lobo Sup Dir	Lobo Médio	Lobo Inf Dir	Lobo Sup Esq	Lobo Inf Esq					#REF!								Unico Lobo	Unilateral						YES	NO	YES	YES	NO	YES	NO	YES
279	>80	3	2020-04-05	POSITIVE FOR COVID	YES	3	2 - Moderado (25-50%)	Consolidação Pura				Espessamento Brônquico	Derrame Pleural		Central e Periferico	Dois ou Mais Lobos	Bilateral	Lobo Sup Dir	Lobo Médio	Lobo Inf Dir	Lobo Sup Esq	Lobo Inf Esq		3			#REF!								Unico Lobo	Unilateral						YES	NO	NO	NO	NO	NO	NO	NO
280	61-70	2	2020-04-01	POSITIVE FOR COVID	NO	0	1 - Leve (<25%)	Vidro Fosco Pura	Aspecto Redondo	Pav Mosaico		Espessamento Brônquico			Central e Periferico	Dois ou Mais Lobos	Bilateral	Lobo Sup Dir		Lobo Inf Dir	Lobo Sup Esq	Lobo Inf Esq		0			#REF!								Unico Lobo	Unilateral						YES	NO	YES	NO	NO	NO	NO	NO
281	71-80	2	2020-03-21	POSITIVE FOR COVID	NO		2 - Moderado (25-50%)	Vidro Fosco Pura		Pav Mosaico		Espessamento Brônquico			Periferico	Dois ou Mais Lobos	Bilateral	Lobo Sup Dir	Lobo Médio	Lobo Inf Dir	Lobo Sup Esq	Lobo Inf Esq					#REF!								Unico Lobo	Unilateral						NO	NO	YES	NO	NO	NO	NO	YES
282	>80	3	2020-03-11	POSITIVE FOR COVID	YES	5	Grave (>50%)	Vidro Fosco e Consolidação		Pav Mosaico		Espessamento Brônquico			Central e Periferico	Dois ou Mais Lobos	Bilateral	Lobo Sup Dir	Lobo Médio	Lobo Inf Dir	Lobo Sup Esq	Lobo Inf Esq	YES	5	Grave (>50%)	Vidro Fosco e Consolidação	#REF!		Pav Mosaico		Espessamento Brônquico			Central e Periferico	Dois ou Mais Lobos	Bilateral	Lobo Sup Dir	Lobo Médio	Lobo Inf Dir	Lobo Sup Esq	Lobo Inf Esq	YES	NO	NO	NO	NO	NO	YES	NO
283	71-80	3	2020-03-06	POSITIVE FOR COVID	NO	4	1 - Leve (<25%)	Vidro Fosco e Consolidação	Aspecto Redondo	Pav Mosaico	Sinal do Halo Reverso	Espessamento Brônquico			Central e Periferico	Dois ou Mais Lobos	Bilateral	Lobo Sup Dir	Lobo Médio	Lobo Inf Dir	Lobo Sup Esq	Lobo Inf Esq	YES	4	1 - Leve (<25%)	Vidro Fosco e Consolidação	#REF!	Aspecto Redondo	Pav Mosaico	Sinal do Halo Reverso	Espessamento Brônquico			Central e Periferico	Dois ou Mais Lobos	Bilateral	Lobo Sup Dir	Lobo Médio	Lobo Inf Dir	Lobo Sup Esq	Lobo Inf Esq	YES	YES	YES	YES	NO	NO	NO	YES
284	71-80	2	2020-04-03	POSITIVE FOR COVID	NO		1 - Leve (<25%)	Vidro Fosco e Consolidação		Pav Mosaico	Sinal do Halo Reverso	Espessamento Brônquico			Central e Periferico	Dois ou Mais Lobos	Bilateral	Lobo Sup Dir	Lobo Médio	Lobo Inf Dir	Lobo Sup Esq	Lobo Inf Esq					#REF!								Unico Lobo	Unilateral						NO	YES	YES	YES	NO	NO	NO	NO
285	71-80	2	2020-03-07	POSITIVE FOR COVID	YES	0	2 - Moderado (25-50%)	Vidro Fosco Pura		Pav Mosaico		Espessamento Brônquico			Central e Periferico	Dois ou Mais Lobos	Bilateral	Lobo Sup Dir	Lobo Médio	Lobo Inf Dir	Lobo Sup Esq	Lobo Inf Esq	YES	0	2 - Moderado (25-50%)	Vidro Fosco Pura	#REF!		Pav Mosaico		Espessamento Brônquico		LinfadeNOmegalia	Central e Periferico	Dois ou Mais Lobos	Bilateral	Lobo Sup Dir	Lobo Médio	Lobo Inf Dir	Lobo Sup Esq	Lobo Inf Esq	YES	NO	YES	NO	NO	NO	YES	NO
286	>80	2	2020-03-07	POSITIVE FOR COVID	NO	1	1 - Leve (<25%)	Vidro Fosco e Consolidação		Pav Mosaico	Sinal do Halo Reverso				Central e Periferico	Dois ou Mais Lobos	Bilateral	Lobo Sup Dir	Lobo Médio	Lobo Inf Dir	Lobo Sup Esq	Lobo Inf Esq	YES	1	1 - Leve (<25%)	Vidro Fosco e Consolidação	#REF!		Pav Mosaico	Sinal do Halo Reverso				Central e Periferico	Dois ou Mais Lobos	Bilateral	Lobo Sup Dir	Lobo Médio	Lobo Inf Dir	Lobo Sup Esq	Lobo Inf Esq	NO	NO	NO	NO	NO	NO	YES	YES
287	<50	1	2020-03-27	POSITIVE FOR COVID	NO		1 - Leve (<25%)	Vidro Fosco e Consolidação		Pav Mosaico					Central e Periferico	Unico Lobo	Unilateral					Lobo Inf Esq					#REF!								Unico Lobo	Unilateral						NO	YES	YES	NO	YES	NO	NO	NO
288	71-80	1	2020-03-24	POSITIVE FOR COVID	NO		1 - Leve (<25%)	Vidro Fosco Pura	Aspecto Redondo	Pav Mosaico		Espessamento Brônquico			Periferico	Dois ou Mais Lobos	Bilateral	Lobo Sup Dir	Lobo Médio	Lobo Inf Dir	Lobo Sup Esq	Lobo Inf Esq					#REF!								Unico Lobo	Unilateral						NO	YES	YES	NO	NO	NO	NO	NO
289	>80	2	2020-03-10	POSITIVE FOR COVID	NO	3	1 - Leve (<25%)	Vidro Fosco e Consolidação	Aspecto Redondo	Pav Mosaico		Espessamento Brônquico			Central e Periferico	Dois ou Mais Lobos	Bilateral	Lobo Sup Dir	Lobo Médio	Lobo Inf Dir	Lobo Sup Esq	Lobo Inf Esq	YES	3	1 - Leve (<25%)	Vidro Fosco e Consolidação	#REF!	Aspecto Redondo	Pav Mosaico					Central e Periferico	Dois ou Mais Lobos	Bilateral	Lobo Sup Dir	Lobo Médio	Lobo Inf Dir	Lobo Sup Esq	Lobo Inf Esq	NO	YES	NO	YES	NO	NO	NO	YES
290	61-70	2	2020-03-29	POSITIVE FOR COVID	NO	1	2 - Moderado (25-50%)	Vidro Fosco Pura		Pav Mosaico	Sinal do Halo Reverso	Espessamento Brônquico			Central e Periferico	Dois ou Mais Lobos	Bilateral	Lobo Sup Dir	Lobo Médio	Lobo Inf Dir	Lobo Sup Esq	Lobo Inf Esq		1			#REF!								Unico Lobo	Unilateral						YES	YES	YES	NO	NO	NO	NO	NO
291	<50	1	2020-03-29	POSITIVE FOR COVID	NO	0	1 - Leve (<25%)	Vidro Fosco Pura	Aspecto Redondo						Periferico	Dois ou Mais Lobos	Bilateral			Lobo Inf Dir		Lobo Inf Esq		0			#REF!								Unico Lobo	Unilateral						NO	NO	NO	NO	YES	NO	NO	NO
292	<50	1	2020-03-27	POSITIVE FOR COVID	NO	0	Não Se Aplica	Ausência de Opacidades				Espessamento Brônquico			Ausência de Opacidades									0			#REF!								Unico Lobo	Unilateral						NO	NO	NO	NO	NO	NO	NO	NO
293	61-70	2	2020-03-24	POSITIVE FOR COVID	NO	4	1 - Leve (<25%)	Vidro Fosco e Consolidação	Aspecto Redondo	Pav Mosaico	Sinal do Halo Reverso	Espessamento Brônquico			Periferico	Dois ou Mais Lobos	Bilateral	Lobo Sup Dir	Lobo Médio	Lobo Inf Dir	Lobo Sup Esq	Lobo Inf Esq		4			#REF!								Unico Lobo	Unilateral						YES	NO	YES	NO	NO	NO	NO	YES
294	71-80	2	2020-03-28	POSITIVE FOR COVID	NO	0	2 - Moderado (25-50%)	Vidro Fosco e Consolidação	Aspecto Redondo	Pav Mosaico		Espessamento Brônquico			Central e Periferico	Dois ou Mais Lobos	Bilateral	Lobo Sup Dir	Lobo Médio	Lobo Inf Dir	Lobo Sup Esq	Lobo Inf Esq		0			#REF!								Unico Lobo	Unilateral						NO	YES	YES	NO	NO	NO	NO	NO
295	61-70	2	2020-03-24	POSITIVE FOR COVID	NO	1	2 - Moderado (25-50%)	Vidro Fosco Pura	Aspecto Redondo	Pav Mosaico		Espessamento Brônquico			Central e Periferico	Dois ou Mais Lobos	Bilateral	Lobo Sup Dir	Lobo Médio	Lobo Inf Dir	Lobo Sup Esq	Lobo Inf Esq		1			#REF!								Unico Lobo	Unilateral						YES	NO	YES	NO	YES	NO	NO	NO
296	>80	2	2020-03-26	POSITIVE FOR COVID	YES	1	2 - Moderado (25-50%)	Vidro Fosco Pura		Pav Mosaico		Espessamento Brônquico			Central e Periferico	Dois ou Mais Lobos	Bilateral	Lobo Sup Dir	Lobo Médio	Lobo Inf Dir	Lobo Sup Esq	Lobo Inf Esq		1			#REF!								Unico Lobo	Unilateral						NO	YES	YES	NO	NO	NO	YES	NO
297	>80	2	2020-03-29	POSITIVE FOR COVID	YES	0	2 - Moderado (25-50%)	Vidro Fosco Pura		Pav Mosaico		Espessamento Brônquico			Central e Periferico	Dois ou Mais Lobos	Bilateral	Lobo Sup Dir	Lobo Médio	Lobo Inf Dir	Lobo Sup Esq	Lobo Inf Esq		0			#REF!								Unico Lobo	Unilateral						YES	NO	YES	NO	NO	NO	NO	NO
298	<50	1	2020-03-28	POSITIVE FOR COVID	NO	0	1 - Leve (<25%)	Vidro Fosco Pura				Espessamento Brônquico			Central e Periferico	Dois ou Mais Lobos	Bilateral	Lobo Sup Dir	Lobo Médio	Lobo Inf Dir	Lobo Sup Esq	Lobo Inf Esq		0			#REF!								Unico Lobo	Unilateral						NO	NO	YES	NO	NO	NO	NO	NO
299	>80	2	2020-03-10	POSITIVE FOR COVID	YES	0	Grave (>50%)	Vidro Fosco Pura		Pav Mosaico					Central e Periferico	Dois ou Mais Lobos	Bilateral	Lobo Sup Dir	Lobo Médio	Lobo Inf Dir	Lobo Sup Esq	Lobo Inf Esq	YES	0	Grave (>50%)	Vidro Fosco Pura	#REF!		Pav Mosaico					Central e Periferico	Dois ou Mais Lobos	Bilateral	Lobo Sup Dir	Lobo Médio	Lobo Inf Dir	Lobo Sup Esq	Lobo Inf Esq	NO	YES	YES	NO	NO	NO	NO	NO
300	71-80	3	2020-03-05	POSITIVE FOR COVID	NO	6	Grave (>50%)	Vidro Fosco e Consolidação		Pav Mosaico					Central e Periferico	Dois ou Mais Lobos	Bilateral	Lobo Sup Dir	Lobo Médio	Lobo Inf Dir	Lobo Sup Esq	Lobo Inf Esq	YES	6	Grave (>50%)	Vidro Fosco e Consolidação	#REF!		Pav Mosaico					Central e Periferico	Dois ou Mais Lobos	Bilateral	Lobo Sup Dir	Lobo Médio	Lobo Inf Dir	Lobo Sup Esq	Lobo Inf Esq	YES	NO	YES	NO	NO	NO	NO	NO
301	<50	1	2020-03-26	POSITIVE FOR COVID	NO	0	NOrmal	Ausência de Opacidades							Ausência de Opacidades									0			#REF!								Unico Lobo	Unilateral						NO	NO	NO	NO	NO	NO	NO	NO
302	61-70	2	2020-04-01	POSITIVE FOR COVID	NO	1	1 - Leve (<25%)	Vidro Fosco Pura	Aspecto Redondo	Pav Mosaico	Sinal do Halo Reverso	Espessamento Brônquico			Central e Periferico	Dois ou Mais Lobos	Bilateral	Lobo Sup Dir	Lobo Médio	Lobo Inf Dir	Lobo Sup Esq	Lobo Inf Esq		1			#REF!								Unico Lobo	Unilateral						YES	YES	NO	NO	NO	NO	NO	NO
303	>80	3	2020-03-28	POSITIVE FOR COVID	YES		Grave (>50%)	Vidro Fosco Pura	Aspecto Redondo	Pav Mosaico		Espessamento Brônquico			Central e Periferico	Dois ou Mais Lobos	Bilateral	Lobo Sup Dir	Lobo Médio	Lobo Inf Dir	Lobo Sup Esq	Lobo Inf Esq					#REF!								Unico Lobo	Unilateral						YES	NO	NO	YES	NO	NO	NO	NO
304	>80	3	2020-03-25	POSITIVE FOR COVID	YES		Grave (>50%)	Vidro Fosco e Consolidação		Pav Mosaico		Espessamento Brônquico	Derrame Pleural		Central e Periferico	Dois ou Mais Lobos	Bilateral	Lobo Sup Dir	Lobo Médio	Lobo Inf Dir	Lobo Sup Esq	Lobo Inf Esq					#REF!								Unico Lobo	Unilateral						YES	NO	NO	NO	NO	NO	NO	NO
305	71-80	3	2020-03-15	POSITIVE FOR COVID	YES	5	Grave (>50%)	Vidro Fosco e Consolidação		Pav Mosaico		Espessamento Brônquico			Central e Periferico	Dois ou Mais Lobos	Bilateral	Lobo Sup Dir	Lobo Médio	Lobo Inf Dir	Lobo Sup Esq	Lobo Inf Esq	YES	5	Grave (>50%)	Vidro Fosco e Consolidação	#REF!		Pav Mosaico		Espessamento Brônquico	Derrame Pleural		Central e Periferico	Dois ou Mais Lobos	Bilateral	Lobo Sup Dir	Lobo Médio	Lobo Inf Dir	Lobo Sup Esq	Lobo Inf Esq	YES	YES	YES	NO	NO	NO	NO	NO
306	<50	2	2020-03-06	POSITIVE FOR COVID	NO	1	2 - Moderado (25-50%)	Vidro Fosco Pura		Pav Mosaico					Central e Periferico	Dois ou Mais Lobos	Bilateral	Lobo Sup Dir	Lobo Médio	Lobo Inf Dir	Lobo Sup Esq	Lobo Inf Esq	YES	1	2 - Moderado (25-50%)	Vidro Fosco Pura	#REF!		Pav Mosaico					Central e Periferico	Dois ou Mais Lobos	Bilateral	Lobo Sup Dir	Lobo Médio	Lobo Inf Dir	Lobo Sup Esq	Lobo Inf Esq	YES	YES	YES	NO	YES	NO	NO	NO
307	61-70	2	2020-03-20	POSITIVE FOR COVID	YES	2	2 - Moderado (25-50%)	Vidro Fosco e Consolidação	Aspecto Redondo	Pav Mosaico		Espessamento Brônquico			Central e Periferico	Dois ou Mais Lobos	Bilateral	Lobo Sup Dir	Lobo Médio	Lobo Inf Dir	Lobo Sup Esq	Lobo Inf Esq	YES	2	2 - Moderado (25-50%)	Vidro Fosco e Consolidação	#REF!	Aspecto Redondo	Pav Mosaico		Espessamento Brônquico			Central e Periferico	Dois ou Mais Lobos	Bilateral	Lobo Sup Dir	Lobo Médio	Lobo Inf Dir	Lobo Sup Esq	Lobo Inf Esq	YES	NO	YES	NO	NO	NO	YES	NO
308	61-70	1	2020-03-26	POSITIVE FOR COVID	NO	1	2 - Moderado (25-50%)	Vidro Fosco e Consolidação	Aspecto Redondo	Pav Mosaico	Sinal do Halo Reverso	Espessamento Brônquico			Periferico	Dois ou Mais Lobos	Bilateral	Lobo Sup Dir	Lobo Médio	Lobo Inf Dir	Lobo Sup Esq	Lobo Inf Esq		1			#REF!								Unico Lobo	Unilateral						NO	YES	NO	YES	NO	NO	NO	NO
309	51-60	2	2020-03-29	POSITIVE FOR COVID	NO		1 - Leve (<25%)	Vidro Fosco e Consolidação	Aspecto Redondo	Pav Mosaico					Periferico	Dois ou Mais Lobos	Bilateral	Lobo Sup Dir	Lobo Médio	Lobo Inf Dir	Lobo Sup Esq	Lobo Inf Esq					#REF!								Unico Lobo	Unilateral						YES	YES	YES	NO	NO	NO	NO	YES
310	71-80	2	2020-03-15	POSITIVE FOR COVID	NO	4	2 - Moderado (25-50%)	Vidro Fosco e Consolidação	Aspecto Redondo	Pav Mosaico					Central e Periferico	Dois ou Mais Lobos	Bilateral	Lobo Sup Dir	Lobo Médio	Lobo Inf Dir	Lobo Sup Esq	Lobo Inf Esq	YES	4	1 - Leve (<25%)	Vidro Fosco e Consolidação	#REF!	Aspecto Redondo	Pav Mosaico					Central e Periferico	Dois ou Mais Lobos	Bilateral	Lobo Sup Dir	Lobo Médio	Lobo Inf Dir	Lobo Sup Esq	Lobo Inf Esq	YES	YES	YES	NO	NO	NO	NO	NO
311	61-70	2	2020-03-31	POSITIVE FOR COVID	NO	0	1 - Leve (<25%)	Vidro Fosco Pura	Aspecto Redondo	Pav Mosaico		Espessamento Brônquico			Periferico	Dois ou Mais Lobos	Bilateral	Lobo Sup Dir	Lobo Médio	Lobo Inf Dir	Lobo Sup Esq	Lobo Inf Esq		0			#REF!								Unico Lobo	Unilateral						YES	YES	NO	NO	NO	NO	NO	NO
312	61-70	2	2020-03-31	POSITIVE FOR COVID	NO	2	Grave (>50%)	Vidro Fosco Pura		Pav Mosaico		Espessamento Brônquico			Central e Periferico	Dois ou Mais Lobos	Bilateral	Lobo Sup Dir	Lobo Médio	Lobo Inf Dir	Lobo Sup Esq	Lobo Inf Esq		2			#REF!								Unico Lobo	Unilateral						YES	YES	NO	NO	NO	NO	YES	NO
313	71-80	2	2020-03-23	POSITIVE FOR COVID	YES		2 - Moderado (25-50%)	Vidro Fosco Pura	Aspecto Redondo	Pav Mosaico			Derrame Pleural		Central e Periferico	Dois ou Mais Lobos	Bilateral	Lobo Sup Dir	Lobo Médio	Lobo Inf Dir	Lobo Sup Esq	Lobo Inf Esq					#REF!								Unico Lobo	Unilateral						NO	YES	YES	NO	NO	NO	NO	NO
314	71-80	1	2020-03-15	POSITIVE FOR COVID	YES	4	1 - Leve (<25%)	Vidro Fosco e Consolidação	Aspecto Redondo	Pav Mosaico					Central e Periferico	Dois ou Mais Lobos	Bilateral		Lobo Médio	Lobo Inf Dir	Lobo Sup Esq		YES	4	1 - Leve (<25%)	Vidro Fosco e Consolidação	#REF!	Aspecto Redondo	Pav Mosaico					Central e Periferico	Dois ou Mais Lobos	Bilateral			Lobo Inf Dir	Lobo Sup Esq		NO	YES	YES	NO	YES	YES	NO	NO
315	>80	1	2020-03-11	POSITIVE FOR COVID	NO	1	1 - Leve (<25%)	Vidro Fosco Pura		Pav Mosaico	Sinal do Halo Reverso	Espessamento Brônquico			Central e Periferico	Unico Lobo	Bilateral	Lobo Sup Dir	Lobo Médio	Lobo Inf Dir	Lobo Sup Esq	Lobo Inf Esq	YES	1	1 - Leve (<25%)	Vidro Fosco Pura	#REF!		Pav Mosaico	Sinal do Halo Reverso	Espessamento Brônquico			Central e Periferico	Dois ou Mais Lobos	Bilateral	Lobo Sup Dir	Lobo Médio	Lobo Inf Dir	Lobo Sup Esq	Lobo Inf Esq	YES	YES	YES	NO	NO	YES	YES	NO
316	51-60	2	2020-03-16	POSITIVE FOR COVID	NO	4	Grave (>50%)	Vidro Fosco e Consolidação	Aspecto Redondo	Pav Mosaico		Espessamento Brônquico			Central e Periferico	Dois ou Mais Lobos	Bilateral	Lobo Sup Dir	Lobo Médio	Lobo Inf Dir	Lobo Sup Esq	Lobo Inf Esq	YES	4	Grave (>50%)	Vidro Fosco e Consolidação	#REF!	Aspecto Redondo	Pav Mosaico					Central e Periferico	Dois ou Mais Lobos	Bilateral	Lobo Sup Dir	Lobo Médio	Lobo Inf Dir	Lobo Sup Esq	Lobo Inf Esq	YES	YES	YES	NO	NO	NO	NO	YES
317	>80	2	2020-03-22	POSITIVE FOR COVID	NO		2 - Moderado (25-50%)	Vidro Fosco e Consolidação		Pav Mosaico		Espessamento Brônquico			Central e Periferico	Dois ou Mais Lobos	Bilateral	Lobo Sup Dir	Lobo Médio	Lobo Inf Dir	Lobo Sup Esq	Lobo Inf Esq					#REF!								Unico Lobo	Unilateral						YES	NO	NO	NO	NO	NO	YES	NO
318	61-70	2	2020-03-19	POSITIVE FOR COVID	NO	4	Grave (>50%)	Vidro Fosco e Consolidação	Aspecto Redondo	Pav Mosaico	Sinal do Halo Reverso	Espessamento Brônquico			Central e Periferico	Dois ou Mais Lobos	Bilateral	Lobo Sup Dir	Lobo Médio	Lobo Inf Dir	Lobo Sup Esq	Lobo Inf Esq		4			#REF!								Unico Lobo	Unilateral						NO	YES	YES	NO	NO	NO	NO	NO
319	51-60	3	2020-03-24	POSITIVE FOR COVID	NO	0	Grave (>50%)	Vidro Fosco Pura		Pav Mosaico		Espessamento Brônquico			Central e Periferico	Dois ou Mais Lobos	Bilateral	Lobo Sup Dir	Lobo Médio	Lobo Inf Dir	Lobo Sup Esq	Lobo Inf Esq		0			#REF!								Unico Lobo	Unilateral						NO	YES	YES	NO	NO	YES	NO	NO
320	>80	2	2020-03-10	POSITIVE FOR COVID	YES	4	2 - Moderado (25-50%)	Vidro Fosco e Consolidação	Aspecto Redondo	Pav Mosaico	Sinal do Halo Reverso	Espessamento Brônquico			Central e Periferico	Dois ou Mais Lobos	Bilateral	Lobo Sup Dir	Lobo Médio	Lobo Inf Dir	Lobo Sup Esq	Lobo Inf Esq	YES	4	2 - Moderado (25-50%)	Vidro Fosco e Consolidação	#REF!	Aspecto Redondo	Pav Mosaico	Sinal do Halo Reverso	Espessamento Brônquico			Central e Periferico	Dois ou Mais Lobos	Bilateral	Lobo Sup Dir	Lobo Médio	Lobo Inf Dir	Lobo Sup Esq	Lobo Inf Esq	YES	NO	YES	NO	NO	YES	YES	NO
321	>80	2	2020-03-26	POSITIVE FOR COVID	YES	1	Grave (>50%)	Vidro Fosco Pura	Aspecto Redondo	Pav Mosaico		Espessamento Brônquico			Central e Periferico	Dois ou Mais Lobos	Bilateral	Lobo Sup Dir	Lobo Médio	Lobo Inf Dir	Lobo Sup Esq	Lobo Inf Esq		1			#REF!								Unico Lobo	Unilateral						YES	NO	NO	NO	NO	NO	YES	NO
322	>80	2	2020-03-15	POSITIVE FOR COVID	NO	1	2 - Moderado (25-50%)	Vidro Fosco e Consolidação		Pav Mosaico	Sinal do Halo Reverso	Espessamento Brônquico			Central e Periferico	Dois ou Mais Lobos	Bilateral	Lobo Sup Dir	Lobo Médio	Lobo Inf Dir	Lobo Sup Esq	Lobo Inf Esq	YES	1	2 - Moderado (25-50%)	Vidro Fosco e Consolidação	#REF!		Pav Mosaico	Sinal do Halo Reverso	Espessamento Brônquico			Central e Periferico	Dois ou Mais Lobos	Bilateral	Lobo Sup Dir	Lobo Médio	Lobo Inf Dir	Lobo Sup Esq	Lobo Inf Esq	NO	YES	YES	NO	NO	NO	NO	NO
323	71-80	2	2020-03-31	POSITIVE FOR COVID	YES		2 - Moderado (25-50%)	Vidro Fosco e Consolidação	Aspecto Redondo	Pav Mosaico		Espessamento Brônquico			Central e Periferico	Dois ou Mais Lobos	Bilateral	Lobo Sup Dir	Lobo Médio	Lobo Inf Dir	Lobo Sup Esq	Lobo Inf Esq					#REF!								Unico Lobo	Unilateral						YES	NO	NO	NO	NO	NO	NO	NO
324	71-80	2	2020-03-23	POSITIVE FOR COVID	YES	4	1 - Leve (<25%)	Vidro Fosco Pura	Aspecto Redondo	Pav Mosaico	Sinal do Halo Reverso	Espessamento Brônquico			Central e Periferico	Dois ou Mais Lobos	Bilateral	Lobo Sup Dir	Lobo Médio	Lobo Inf Dir	Lobo Sup Esq	Lobo Inf Esq		4			#REF!								Unico Lobo	Unilateral						NO	YES	YES	NO	NO	NO	NO	NO
325	61-70	1	2020-03-20	POSITIVE FOR COVID	NO		1 - Leve (<25%)	Vidro Fosco Pura	Aspecto Redondo	Pav Mosaico	Sinal do Halo Reverso	Espessamento Brônquico			Periferico	Dois ou Mais Lobos	Bilateral	Lobo Sup Dir	Lobo Médio	Lobo Inf Dir	Lobo Sup Esq	Lobo Inf Esq					#REF!								Unico Lobo	Unilateral						NO	YES	YES	NO	NO	NO	YES	YES
326	71-80	2	2020-03-19	POSITIVE FOR COVID	NO	1	1 - Leve (<25%)	Vidro Fosco e Consolidação	Aspecto Redondo	Pav Mosaico		Espessamento Brônquico	Derrame Pleural		Central e Periferico	Dois ou Mais Lobos	Bilateral	Lobo Sup Dir	Lobo Médio	Lobo Inf Dir	Lobo Sup Esq	Lobo Inf Esq		1			#REF!								Unico Lobo	Unilateral						YES	NO	YES	NO	NO	NO	NO	NO
327	61-70	2	2020-03-23	POSITIVE FOR COVID	NO	1	1 - Leve (<25%)	Vidro Fosco e Consolidação		Pav Mosaico		Espessamento Brônquico			Periferico	Dois ou Mais Lobos	Bilateral			Lobo Inf Dir		Lobo Inf Esq		1			#REF!								Unico Lobo	Unilateral						NO	YES	NO	NO	NO	NO	YES	NO
328	71-80	3	2020-03-20	POSITIVE FOR COVID	YES	1	Grave (>50%)	Vidro Fosco e Consolidação		Pav Mosaico	Sinal do Halo Reverso	Espessamento Brônquico			Central e Periferico	Dois ou Mais Lobos	Bilateral	Lobo Sup Dir	Lobo Médio	Lobo Inf Dir	Lobo Sup Esq	Lobo Inf Esq	YES	1	Grave (>50%)	Vidro Fosco e Consolidação	#REF!		Pav Mosaico	Sinal do Halo Reverso	Espessamento Brônquico			Central e Periferico	Dois ou Mais Lobos	Bilateral	Lobo Sup Dir	Lobo Médio	Lobo Inf Dir	Lobo Sup Esq	Lobo Inf Esq	YES	YES	YES	YES	NO	NO	NO	NO
329	61-70	2	2020-03-15	POSITIVE FOR COVID	NO	1	2 - Moderado (25-50%)	Vidro Fosco Pura	Aspecto Redondo	Pav Mosaico	Sinal do Halo Reverso				Central e Periferico	Dois ou Mais Lobos	Bilateral	Lobo Sup Dir	Lobo Médio	Lobo Inf Dir	Lobo Sup Esq	Lobo Inf Esq	YES	1	2 - Moderado (25-50%)	Vidro Fosco Pura	#REF!	Aspecto Redondo	Pav Mosaico	Sinal do Halo Reverso				Central e Periferico	Dois ou Mais Lobos	Bilateral	Lobo Sup Dir	Lobo Médio	Lobo Inf Dir	Lobo Sup Esq	Lobo Inf Esq	YES	YES	YES	NO	NO	NO	NO	YES
330	71-80	2	2020-03-16	POSITIVE FOR COVID	NO	1	1 - Leve (<25%)	Vidro Fosco Pura	Aspecto Redondo	Pav Mosaico					Periferico	Dois ou Mais Lobos	Bilateral	Lobo Sup Dir	Lobo Médio	Lobo Inf Dir	Lobo Sup Esq	Lobo Inf Esq		1			#REF!								Unico Lobo	Unilateral						NO	YES	YES	NO	NO	NO	NO	NO
331	71-80	2	2020-03-05	POSITIVE FOR COVID	NO	1	1 - Leve (<25%)	Vidro Fosco Pura	Aspecto Redondo	Pav Mosaico	Sinal do Halo Reverso				Periferico	Dois ou Mais Lobos	Bilateral			Lobo Inf Dir	Lobo Sup Esq	Lobo Inf Esq	YES	1	1 - Leve (<25%)	Vidro Fosco Pura	#REF!	Aspecto Redondo	Pav Mosaico	Sinal do Halo Reverso				Periferico	Dois ou Mais Lobos	Bilateral			Lobo Inf Dir	Lobo Sup Esq	Lobo Inf Esq	YES	YES	YES	NO	YES	NO	NO	NO
332	<50	1	2020-03-10	POSITIVE FOR COVID	NO	0	1 - Leve (<25%)	Vidro Fosco Pura	Aspecto Redondo	Pav Mosaico					Central e Periferico	Dois ou Mais Lobos	Bilateral	Lobo Sup Dir	Lobo Médio	Lobo Inf Dir	Lobo Sup Esq	Lobo Inf Esq	YES	0	1 - Leve (<25%)	Vidro Fosco Pura	#REF!	Aspecto Redondo	Pav Mosaico					Central e Periferico	Dois ou Mais Lobos	Bilateral	Lobo Sup Dir	Lobo Médio	Lobo Inf Dir	Lobo Sup Esq	Lobo Inf Esq	NO	NO	NO	NO	YES	NO	NO	NO
333	>80	3	2020-03-10	POSITIVE FOR COVID	NO		2 - Moderado (25-50%)	Vidro Fosco e Consolidação		Pav Mosaico		Espessamento Brônquico	Derrame Pleural		Central e Periferico	Dois ou Mais Lobos	Bilateral	Lobo Sup Dir		Lobo Inf Dir	Lobo Sup Esq	Lobo Inf Esq					#REF!								Unico Lobo	Unilateral						YES	NO	YES	NO	NO	NO	NO	NO
334	61-70	2	2020-03-22	POSITIVE FOR COVID	NO	4	1 - Leve (<25%)	Vidro Fosco e Consolidação	Aspecto Redondo	Pav Mosaico	Sinal do Halo Reverso	Espessamento Brônquico			Central e Periferico	Dois ou Mais Lobos	Bilateral	Lobo Sup Dir	Lobo Médio	Lobo Inf Dir	Lobo Sup Esq	Lobo Inf Esq	YES	4	2 - Moderado (25-50%)	Vidro Fosco e Consolidação	#REF!	Aspecto Redondo	Pav Mosaico	Sinal do Halo Reverso	Espessamento Brônquico			Central e Periferico	Dois ou Mais Lobos	Bilateral	Lobo Sup Dir	Lobo Médio	Lobo Inf Dir	Lobo Sup Esq	Lobo Inf Esq	NO	YES	YES	NO	NO	NO	NO	NO
335	61-70	2	2020-03-16	POSITIVE FOR COVID	NO		1 - Leve (<25%)	Vidro Fosco e Consolidação	Aspecto Redondo	Pav Mosaico		Espessamento Brônquico			Central e Periferico	Dois ou Mais Lobos	Bilateral	Lobo Sup Dir	Lobo Médio	Lobo Inf Dir	Lobo Sup Esq	Lobo Inf Esq	YES		1 - Leve (<25%)	Vidro Fosco e Consolidação	#REF!	Aspecto Redondo	Pav Mosaico		Espessamento Brônquico			Central e Periferico	Dois ou Mais Lobos	Bilateral	Lobo Sup Dir	Lobo Médio	Lobo Inf Dir	Lobo Sup Esq	Lobo Inf Esq	NO	YES	YES	NO	YES	YES	NO	NO
336	<50	1	2020-03-12	POSITIVE FOR COVID	NO		1 - Leve (<25%)	Vidro Fosco e Consolidação	Aspecto Redondo						Central e Periferico	Dois ou Mais Lobos	Bilateral	Lobo Sup Dir	Lobo Médio	Lobo Inf Dir	Lobo Sup Esq	Lobo Inf Esq	YES		1 - Leve (<25%)	Vidro Fosco e Consolidação	#REF!	Aspecto Redondo			Espessamento Brônquico			Central e Periferico	Dois ou Mais Lobos	Bilateral	Lobo Sup Dir	Lobo Médio	Lobo Inf Dir	Lobo Sup Esq	Lobo Inf Esq	YES	YES	YES	NO	NO	NO	NO	NO
337	<50	1	2020-03-01	POSITIVE FOR COVID	NO	5	2 - Moderado (25-50%)	Vidro Fosco Pura	Aspecto Redondo	Pav Mosaico	Sinal do Halo Reverso	Espessamento Brônquico			Central e Periferico	Dois ou Mais Lobos	Bilateral	Lobo Sup Dir	Lobo Médio	Lobo Inf Dir	Lobo Sup Esq	Lobo Inf Esq	YES	5	2 - Moderado (25-50%)	Vidro Fosco e Consolidação	#REF!	Aspecto Redondo	Pav Mosaico	Sinal do Halo Reverso	Espessamento Brônquico			Central e Periferico	Dois ou Mais Lobos	Bilateral	Lobo Sup Dir	Lobo Médio	Lobo Inf Dir	Lobo Sup Esq	Lobo Inf Esq	YES	YES	YES	NO	NO	NO	NO	NO
338	71-80	2	2020-03-24	POSITIVE FOR COVID	NO	1	2 - Moderado (25-50%)	Vidro Fosco Pura		Pav Mosaico		Espessamento Brônquico			Periferico	Dois ou Mais Lobos	Bilateral	Lobo Sup Dir	Lobo Médio	Lobo Inf Dir	Lobo Sup Esq	Lobo Inf Esq		1			#REF!								Unico Lobo	Unilateral						NO	NO	NO	NO	NO	NO	NO	YES
339	71-80	2	2020-03-20	POSITIVE FOR COVID	YES	0	2 - Moderado (25-50%)	Vidro Fosco Pura		Pav Mosaico					Central e Periferico	Dois ou Mais Lobos	Bilateral	Lobo Sup Dir	Lobo Médio	Lobo Inf Dir	Lobo Sup Esq	Lobo Inf Esq	YES	0	2 - Moderado (25-50%)	Vidro Fosco Pura	#REF!		Pav Mosaico					Central e Periferico	Dois ou Mais Lobos	Bilateral	Lobo Sup Dir	Lobo Médio	Lobo Inf Dir	Lobo Sup Esq	Lobo Inf Esq	YES	NO	YES	NO	NO	NO	YES	NO
340	>80	3	2020-03-03	POSITIVE FOR COVID	YES	1	2 - Moderado (25-50%)	Vidro Fosco Pura		Pav Mosaico		Espessamento Brônquico			Central e Periferico	Dois ou Mais Lobos	Bilateral	Lobo Sup Dir	Lobo Médio	Lobo Inf Dir	Lobo Sup Esq	Lobo Inf Esq	YES	1	2 - Moderado (25-50%)	Vidro Fosco Pura	#REF!		Pav Mosaico		Espessamento Brônquico			Central e Periferico	Dois ou Mais Lobos	Bilateral	Lobo Sup Dir	Lobo Médio	Lobo Inf Dir	Lobo Sup Esq	Lobo Inf Esq	YES	NO	YES	NO	NO	NO	NO	NO
341	<50	1	2020-03-17	POSITIVE FOR COVID	NO	0	1 - Leve (<25%)	Vidro Fosco e Consolidação	Aspecto Redondo			Espessamento Brônquico			Periferico	Dois ou Mais Lobos	Bilateral		Lobo Médio	Lobo Inf Dir	Lobo Sup Esq	Lobo Inf Esq	YES	0	1 - Leve (<25%)	Vidro Fosco e Consolidação	#REF!	Aspecto Redondo			Espessamento Brônquico			Periferico	Dois ou Mais Lobos	Bilateral		Lobo Médio	Lobo Inf Dir	Lobo Sup Esq	Lobo Inf Esq	NO	NO	YES	NO	NO	NO	NO	NO
342	71-80	3	2020-03-13	POSITIVE FOR COVID	YES		2 - Moderado (25-50%)	Vidro Fosco e Consolidação	Aspecto Redondo			Espessamento Brônquico			Central e Periferico	Dois ou Mais Lobos	Bilateral	Lobo Sup Dir	Lobo Médio	Lobo Inf Dir	Lobo Sup Esq	Lobo Inf Esq	YES		2 - Moderado (25-50%)	Vidro Fosco Pura	#REF!	Aspecto Redondo	Pav Mosaico		Espessamento Brônquico			Central e Periferico	Dois ou Mais Lobos	Bilateral	Lobo Sup Dir	Lobo Médio	Lobo Inf Dir	Lobo Sup Esq	Lobo Inf Esq	YES	NO	NO	NO	NO	NO	NO	YES
343	<50	1	2020-04-01	POSITIVE FOR COVID	NO	4	1 - Leve (<25%)	Vidro Fosco Pura	Aspecto Redondo	Pav Mosaico	Sinal do Halo Reverso	Espessamento Brônquico			Periferico	Dois ou Mais Lobos	Bilateral		Lobo Médio			Lobo Inf Esq		4			#REF!								Unico Lobo	Unilateral						YES	NO	YES	NO	NO	NO	NO	YES
344	<50	1	2020-03-26	POSITIVE FOR COVID	NO	0	1 - Leve (<25%)	Vidro Fosco e Consolidação	Aspecto Redondo	Pav Mosaico		Espessamento Brônquico			Periferico	Unico Lobo	Unilateral			Lobo Inf Dir				0			#REF!								Unico Lobo	Unilateral						NO	NO	YES	NO	YES	YES	YES	NO
345	<50	1	2020-03-22	POSITIVE FOR COVID	NO	3	1 - Leve (<25%)	Vidro Fosco e Consolidação	Aspecto Redondo	Pav Mosaico		Espessamento Brônquico			Periferico	Dois ou Mais Lobos	Bilateral			Lobo Inf Dir	Lobo Sup Esq	Lobo Inf Esq		3			#REF!								Unico Lobo	Unilateral						YES	NO	YES	NO	NO	NO	NO	NO
346	<50	1	2020-03-24	POSITIVE FOR COVID	NO	0	Não Se Aplica	Ausência de Opacidades				Espessamento Brônquico			Ausência de Opacidades								Não	0	Não Se Aplica	Ausência de Opacidades	#REF!				Espessamento Brônquico			Ausência de Opacidades								NO	NO	YES	NO	YES	NO	NO	NO
347	<50	1	2020-03-27	POSITIVE FOR COVID	NO	4	1 - Leve (<25%)	Vidro Fosco e Consolidação		Pav Mosaico					Periferico	Unico Lobo	Unilateral					Lobo Inf Esq		4			#REF!								Unico Lobo	Unilateral						NO	NO	YES	NO	NO	NO	NO	NO
348	71-80	2	2020-04-01	POSITIVE FOR COVID	NO	5	2 - Moderado (25-50%)	Vidro Fosco e Consolidação	Aspecto Redondo	Pav Mosaico		Espessamento Brônquico			Central e Periferico	Dois ou Mais Lobos	Bilateral	Lobo Sup Dir	Lobo Médio	Lobo Inf Dir	Lobo Sup Esq	Lobo Inf Esq		5			#REF!								Unico Lobo	Unilateral						YES	NO	YES	NO	NO	NO	NO	NO
349	>80	2	2020-03-19	POSITIVE FOR COVID	YES		1 - Leve (<25%)	Vidro Fosco e Consolidação	Aspecto Redondo			Espessamento Brônquico			Central e Periferico	Dois ou Mais Lobos	Bilateral	Lobo Sup Dir	Lobo Médio	Lobo Inf Dir	Lobo Sup Esq	Lobo Inf Esq					#REF!								Unico Lobo	Unilateral						YES	YES	YES	NO	NO	YES	NO	NO
350	71-80	2	2020-03-24	POSITIVE FOR COVID	YES		2 - Moderado (25-50%)	Vidro Fosco e Consolidação	Aspecto Redondo	Pav Mosaico		Espessamento Brônquico			Central e Periferico	Dois ou Mais Lobos	Bilateral	Lobo Sup Dir	Lobo Médio	Lobo Inf Dir	Lobo Sup Esq	Lobo Inf Esq					#REF!								Unico Lobo	Unilateral						NO	YES	NO	NO	NO	NO	YES	NO
351	71-80	1	2020-03-23	POSITIVE FOR COVID	NO		2 - Moderado (25-50%)	Vidro Fosco Pura	Aspecto Redondo	Pav Mosaico	Sinal do Halo Reverso	Espessamento Brônquico			Central e Periferico	Dois ou Mais Lobos	Bilateral	Lobo Sup Dir	Lobo Médio	Lobo Inf Dir	Lobo Sup Esq	Lobo Inf Esq					#REF!								Unico Lobo	Unilateral						NO	NO	YES	YES	NO	NO	NO	NO
352	51-60	2	2020-04-01	POSITIVE FOR COVID	NO		2 - Moderado (25-50%)	Vidro Fosco Pura	Aspecto Redondo	Pav Mosaico		Espessamento Brônquico			Periferico	Dois ou Mais Lobos	Bilateral	Lobo Sup Dir	Lobo Médio	Lobo Inf Dir	Lobo Sup Esq	Lobo Inf Esq					#REF!								Unico Lobo	Unilateral						YES	NO	YES	NO	NO	NO	YES	NO
353	61-70	1	2020-03-15	POSITIVE FOR COVID	NO	4	1 - Leve (<25%)	Vidro Fosco e Consolidação	Aspecto Redondo	Pav Mosaico		Espessamento Brônquico			Central e Periferico	Dois ou Mais Lobos	Bilateral	Lobo Sup Dir	Lobo Médio	Lobo Inf Dir	Lobo Sup Esq	Lobo Inf Esq	YES	4	1 - Leve (<25%)	Vidro Fosco e Consolidação	#REF!	Aspecto Redondo	Pav Mosaico		Espessamento Brônquico			Central e Periferico	Dois ou Mais Lobos	Bilateral	Lobo Sup Dir	Lobo Médio	Lobo Inf Dir	Lobo Sup Esq	Lobo Inf Esq	NO	NO	YES	NO	NO	NO	NO	NO
354	51-60	3	2020-03-03	POSITIVE FOR COVID	NO	5	2 - Moderado (25-50%)	Vidro Fosco e Consolidação		Pav Mosaico		Espessamento Brônquico			Central e Periferico	Dois ou Mais Lobos	Bilateral	Lobo Sup Dir	Lobo Médio	Lobo Inf Dir	Lobo Sup Esq	Lobo Inf Esq	YES	5	2 - Moderado (25-50%)	Vidro Fosco e Consolidação	#REF!		Pav Mosaico		Espessamento Brônquico			Central e Periferico	Dois ou Mais Lobos	Bilateral	Lobo Sup Dir	Lobo Médio	Lobo Inf Dir	Lobo Sup Esq	Lobo Inf Esq	YES	YES	YES	NO	NO	NO	NO	NO
355	51-60	2	2020-03-20	POSITIVE FOR COVID	NO		2 - Moderado (25-50%)	Vidro Fosco Pura	Aspecto Redondo	Pav Mosaico		Espessamento Brônquico			Central e Periferico	Dois ou Mais Lobos	Bilateral	Lobo Sup Dir	Lobo Médio	Lobo Inf Dir	Lobo Sup Esq	Lobo Inf Esq					#REF!								Unico Lobo	Unilateral						YES	NO	NO	YES	NO	NO	NO	YES
356	51-60	2	2020-03-30	POSITIVE FOR COVID	NO		2 - Moderado (25-50%)	Vidro Fosco Pura	Aspecto Redondo	Pav Mosaico	Sinal do Halo Reverso	Espessamento Brônquico			Central e Periferico	Dois ou Mais Lobos	Bilateral	Lobo Sup Dir	Lobo Médio	Lobo Inf Dir	Lobo Sup Esq	Lobo Inf Esq					#REF!								Unico Lobo	Unilateral						NO	NO	NO	NO	NO	NO	NO	NO
357	<50	1	2020-03-29	POSITIVE FOR COVID	NO	0	1 - Leve (<25%)	Vidro Fosco e Consolidação	Aspecto Redondo	Pav Mosaico					Periferico	Dois ou Mais Lobos	Bilateral		Lobo Médio	Lobo Inf Dir	Lobo Sup Esq	Lobo Inf Esq		0			#REF!								Unico Lobo	Unilateral						NO	NO	NO	NO	NO	NO	NO	NO
358	<50	1	2020-03-10	POSITIVE FOR COVID	NO	0	1 - Leve (<25%)	Vidro Fosco Pura	Aspecto Redondo	Pav Mosaico		Espessamento Brônquico			Central e Periferico	Dois ou Mais Lobos	Bilateral	Lobo Sup Dir	Lobo Médio	Lobo Inf Dir	Lobo Sup Esq	Lobo Inf Esq	YES	0	1 - Leve (<25%)	Vidro Fosco Pura	#REF!	Aspecto Redondo	Pav Mosaico		Espessamento Brônquico			Central e Periferico	Dois ou Mais Lobos	Bilateral	Lobo Sup Dir	Lobo Médio	Lobo Inf Dir	Lobo Sup Esq	Lobo Inf Esq	YES	YES	YES	NO	NO	NO	NO	YES
359	<50	1	2020-03-17	POSITIVE FOR COVID	NO	0	1 - Leve (<25%)	Vidro Fosco e Consolidação	Aspecto Redondo	Pav Mosaico					Periferico							Lobo Inf Esq	YES	0	1 - Leve (<25%)	Vidro Fosco e Consolidação	#REF!	Aspecto Redondo	Pav Mosaico					Periferico	Unico Lobo	Unilateral					Lobo Inf Esq	NO	YES	YES	NO	NO	NO	NO	NO
360	51-60	1	2020-03-18	POSITIVE FOR COVID	NO		2 - Moderado (25-50%)	Vidro Fosco e Consolidação	Aspecto Redondo	Pav Mosaico	Sinal do Halo Reverso	Espessamento Brônquico			Central e Periferico	Dois ou Mais Lobos	Bilateral		Lobo Médio	Lobo Inf Dir	Lobo Sup Esq	Lobo Inf Esq					#REF!								Unico Lobo	Unilateral						YES	YES	YES	YES	YES	NO	NO	NO
361	<50	1	2020-03-27	POSITIVE FOR COVID	NO		NOrmal	Ausência de Opacidades							Ausência de Opacidades												#REF!								Unico Lobo	Unilateral						NO	NO	YES	NO	NO	YES	YES	NO
362	<50	1	2020-03-09	POSITIVE FOR COVID	NO	1	1 - Leve (<25%)	Vidro Fosco e Consolidação	Aspecto Redondo	Pav Mosaico	Sinal do Halo Reverso				Periferico	Dois ou Mais Lobos	Bilateral		Lobo Médio	Lobo Inf Dir	Lobo Sup Esq	Lobo Inf Esq	YES	1	1 - Leve (<25%)	Vidro Fosco e Consolidação	#REF!	Aspecto Redondo	Pav Mosaico	Sinal do Halo Reverso				Periferico	Dois ou Mais Lobos	Bilateral		Lobo Médio	Lobo Inf Dir	Lobo Sup Esq	Lobo Inf Esq	NO	NO	YES	NO	NO	NO	NO	NO
363	61-70	2	2020-03-15	POSITIVE FOR COVID	NO		1 - Leve (<25%)	Vidro Fosco e Consolidação		Pav Mosaico	Sinal do Halo Reverso				Central e Periferico	Dois ou Mais Lobos	Bilateral	Lobo Sup Dir	Lobo Médio	Lobo Inf Dir	Lobo Sup Esq	Lobo Inf Esq	YES		1 - Leve (<25%)	Vidro Fosco e Consolidação	#REF!		Pav Mosaico	Sinal do Halo Reverso				Central e Periferico	Dois ou Mais Lobos	Bilateral	Lobo Sup Dir	Lobo Médio	Lobo Inf Dir	Lobo Sup Esq	Lobo Inf Esq	NO	YES	YES	NO	YES	NO	NO	NO
364	61-70	2	2020-03-26	POSITIVE FOR COVID	NO	4	2 - Moderado (25-50%)	Vidro Fosco Pura		Pav Mosaico		Espessamento Brônquico			Central e Periferico	Dois ou Mais Lobos	Bilateral	Lobo Sup Dir	Lobo Médio	Lobo Inf Dir	Lobo Sup Esq	Lobo Inf Esq		4			#REF!								Unico Lobo	Unilateral						YES	YES	YES	NO	NO	NO	NO	NO
365	>80	2	2020-03-03	POSITIVE FOR COVID	YES	0	1 - Leve (<25%)	Vidro Fosco Pura		Pav Mosaico		Espessamento Brônquico			Central e Periferico	Dois ou Mais Lobos	Bilateral	Lobo Sup Dir	Lobo Médio	Lobo Inf Dir	Lobo Sup Esq	Lobo Inf Esq	YES	0	1 - Leve (<25%)	Vidro Fosco Pura	#REF!		Pav Mosaico	Sinal do Halo Reverso	Espessamento Brônquico			Central e Periferico	Dois ou Mais Lobos	Bilateral	Lobo Sup Dir	Lobo Médio	Lobo Inf Dir	Lobo Sup Esq	Lobo Inf Esq	NO	YES	YES	NO	NO	NO	YES	NO
366	61-70	1	2020-03-13	POSITIVE FOR COVID	NO	0	1 - Leve (<25%)	Vidro Fosco Pura		Pav Mosaico	Sinal do Halo Reverso	Espessamento Brônquico			Periferico	Dois ou Mais Lobos	Bilateral	Lobo Sup Dir		Lobo Inf Dir	Lobo Sup Esq	Lobo Inf Esq	YES	0	1 - Leve (<25%)	Vidro Fosco Pura	#REF!		Pav Mosaico		Espessamento Brônquico			Periferico	Dois ou Mais Lobos	Bilateral	Lobo Sup Dir	Lobo Médio	Lobo Inf Dir	Lobo Sup Esq	Lobo Inf Esq	NO	NO	NO	YES	NO	NO	NO	NO
367	>80	2	2020-03-23	POSITIVE FOR COVID	NO	0	1 - Leve (<25%)	Vidro Fosco Pura	Aspecto Redondo	Pav Mosaico		Espessamento Brônquico			Periferico	Dois ou Mais Lobos	Bilateral			Lobo Inf Dir		Lobo Inf Esq		0			#REF!								Unico Lobo	Unilateral						YES	NO	YES	NO	NO	NO	NO	NO
368	71-80	2	2020-03-20	POSITIVE FOR COVID	NO	0	1 - Leve (<25%)	Vidro Fosco Pura	Aspecto Redondo	Pav Mosaico					Central e Periferico	Dois ou Mais Lobos	Unilateral		Lobo Médio	Lobo Inf Dir			YES	0	1 - Leve (<25%)	Vidro Fosco Pura	#REF!		Pav Mosaico		Espessamento Brônquico			Central e Periferico	Unico Lobo	Unilateral		Lobo Médio	Lobo Inf Dir			YES	YES	YES	NO	NO	NO	NO	NO
369	71-80	1	2020-03-22	POSITIVE FOR COVID	NO	0	1 - Leve (<25%)	Vidro Fosco Pura	Aspecto Redondo	Pav Mosaico					Periferico	Dois ou Mais Lobos	Bilateral		Lobo Médio	Lobo Inf Dir	Lobo Sup Esq		YES	0	1 - Leve (<25%)	Vidro Fosco Pura	#REF!	Aspecto Redondo	Pav Mosaico					Periferico	Dois ou Mais Lobos	Bilateral			Lobo Inf Dir	Lobo Sup Esq		NO	NO	NO	YES	NO	NO	NO	NO
370	71-80	2	2020-04-01	POSITIVE FOR COVID	NO	1	1 - Leve (<25%)	Vidro Fosco Pura	Aspecto Redondo	Pav Mosaico		Espessamento Brônquico			Central e Periferico	Dois ou Mais Lobos	Bilateral	Lobo Sup Dir	Lobo Médio	Lobo Inf Dir	Lobo Sup Esq	Lobo Inf Esq		1			#REF!								Unico Lobo	Unilateral						NO	NO	NO	YES	NO	NO	NO	NO
371	>80	3	2020-03-23	POSITIVE FOR COVID	YES	4	2 - Moderado (25-50%)	Vidro Fosco e Consolidação	Aspecto Redondo	Pav Mosaico	Sinal do Halo Reverso		Derrame Pleural		Central e Periferico	Dois ou Mais Lobos	Bilateral	Lobo Sup Dir	Lobo Médio	Lobo Inf Dir	Lobo Sup Esq	Lobo Inf Esq		4			#REF!								Unico Lobo	Unilateral						YES	YES	YES	NO	NO	NO	NO	NO
372	>80	2	2020-03-04	POSITIVE FOR COVID	NO	4	2 - Moderado (25-50%)	Vidro Fosco Pura		Pav Mosaico	Sinal do Halo Reverso	Espessamento Brônquico			Central e Periferico	Dois ou Mais Lobos	Bilateral	Lobo Sup Dir	Lobo Médio	Lobo Inf Dir	Lobo Sup Esq	Lobo Inf Esq		4			#REF!								Unico Lobo	Unilateral						NO	NO	NO	YES	NO	NO	NO	NO
373	>80	2	2020-03-11	POSITIVE FOR COVID	YES		2 - Moderado (25-50%)	Vidro Fosco e Consolidação		Pav Mosaico		Espessamento Brônquico			Central e Periferico	Dois ou Mais Lobos	Bilateral	Lobo Sup Dir	Lobo Médio	Lobo Inf Dir	Lobo Sup Esq	Lobo Inf Esq	YES		2 - Moderado (25-50%)	Vidro Fosco e Consolidação	#REF!		Pav Mosaico		Espessamento Brônquico		LinfadeNOmegalia	Central e Periferico	Dois ou Mais Lobos	Bilateral	Lobo Sup Dir	Lobo Médio	Lobo Inf Dir	Lobo Sup Esq	Lobo Inf Esq	YES	NO	YES	NO	NO	NO	YES	YES
374	>80	2	2020-03-02	POSITIVE FOR COVID	YES	5	Grave (>50%)	Vidro Fosco Pura		Pav Mosaico		Espessamento Brônquico			Central e Periferico	Dois ou Mais Lobos	Bilateral	Lobo Sup Dir	Lobo Médio	Lobo Inf Dir	Lobo Sup Esq	Lobo Inf Esq	YES	5	Grave (>50%)	Vidro Fosco Pura	#REF!		Pav Mosaico		Espessamento Brônquico			Central e Periferico	Dois ou Mais Lobos	Bilateral	Lobo Sup Dir	Lobo Médio	Lobo Inf Dir	Lobo Sup Esq	Lobo Inf Esq	YES	YES	YES	NO	NO	NO	NO	NO
375	>80	2	2020-03-26	POSITIVE FOR COVID	YES	4	Grave (>50%)	Vidro Fosco e Consolidação		Pav Mosaico	Sinal do Halo Reverso	Espessamento Brônquico			Central e Periferico	Dois ou Mais Lobos	Bilateral	Lobo Sup Dir	Lobo Médio	Lobo Inf Dir	Lobo Sup Esq	Lobo Inf Esq		4			#REF!								Unico Lobo	Unilateral						YES	NO	YES	NO	NO	NO	NO	NO
376	71-80	1	2020-03-26	POSITIVE FOR COVID	NO		2 - Moderado (25-50%)	Vidro Fosco e Consolidação		Pav Mosaico		Espessamento Brônquico			Central e Periferico	Dois ou Mais Lobos	Bilateral	Lobo Sup Dir	Lobo Médio	Lobo Inf Dir	Lobo Sup Esq	Lobo Inf Esq					#REF!								Unico Lobo	Unilateral						YES	YES	YES	NO	NO	NO	NO	NO
377	61-70	2	2020-03-28	POSITIVE FOR COVID	NO	1	2 - Moderado (25-50%)	Vidro Fosco Pura		Pav Mosaico		Espessamento Brônquico			Periferico	Dois ou Mais Lobos	Bilateral	Lobo Sup Dir	Lobo Médio	Lobo Inf Dir	Lobo Sup Esq	Lobo Inf Esq		1			#REF!								Unico Lobo	Unilateral						NO	YES	YES	NO	NO	NO	NO	YES
378	>80	3	2020-03-08	POSITIVE FOR COVID	YES	5	Grave (>50%)	Vidro Fosco Pura		Pav Mosaico		Espessamento Brônquico			Central e Periferico	Dois ou Mais Lobos	Bilateral	Lobo Sup Dir	Lobo Médio	Lobo Inf Dir	Lobo Sup Esq	Lobo Inf Esq	YES	5	Grave (>50%)	Vidro Fosco Pura	#REF!		Pav Mosaico					Central e Periferico	Dois ou Mais Lobos	Bilateral	Lobo Sup Dir	Lobo Médio	Lobo Inf Dir	Lobo Sup Esq	Lobo Inf Esq	YES	YES	YES	NO	NO	NO	NO	NO
379	61-70	3	2020-03-08	POSITIVE FOR COVID	YES	1	Grave (>50%)	Vidro Fosco e Consolidação	Aspecto Redondo	Pav Mosaico		Espessamento Brônquico			Central e Periferico	Dois ou Mais Lobos	Bilateral	Lobo Sup Dir	Lobo Médio	Lobo Inf Dir	Lobo Sup Esq	Lobo Inf Esq	YES	1	Grave (>50%)	Vidro Fosco e Consolidação	#REF!	Aspecto Redondo	Pav Mosaico		Espessamento Brônquico			Central e Periferico	Dois ou Mais Lobos	Bilateral	Lobo Sup Dir	Lobo Médio	Lobo Inf Dir	Lobo Sup Esq	Lobo Inf Esq	YES	YES	YES	NO	NO	NO	NO	NO
380	>80	2	2020-03-19	POSITIVE FOR COVID	YES	1	2 - Moderado (25-50%)	Vidro Fosco e Consolidação	Aspecto Redondo	Pav Mosaico		Espessamento Brônquico			Central e Periferico	Dois ou Mais Lobos	Bilateral	Lobo Sup Dir	Lobo Médio	Lobo Inf Dir	Lobo Sup Esq	Lobo Inf Esq	YES	1	2 - Moderado (25-50%)	Vidro Fosco e Consolidação	#REF!	Aspecto Redondo	Pav Mosaico		Espessamento Brônquico			Central e Periferico	Dois ou Mais Lobos	Bilateral	Lobo Sup Dir	Lobo Médio	Lobo Inf Dir	Lobo Sup Esq	Lobo Inf Esq	NO	NO	YES	YES	NO	NO	NO	YES
381	61-70	2	2020-03-27	POSITIVE FOR COVID	NO		1 - Leve (<25%)	Vidro Fosco Pura	Aspecto Redondo	Pav Mosaico		Espessamento Brônquico			Central e Periferico	Dois ou Mais Lobos	Bilateral	Lobo Sup Dir	Lobo Médio	Lobo Inf Dir	Lobo Sup Esq	Lobo Inf Esq					#REF!								Unico Lobo	Unilateral						YES	YES	NO	NO	YES	NO	YES	NO
382	<50	1	2020-03-10	POSITIVE FOR COVID	NO	0	1 - Leve (<25%)	Vidro Fosco Pura	Aspecto Redondo	Pav Mosaico	Sinal do Halo Reverso	Espessamento Brônquico			Periferico	Dois ou Mais Lobos	Bilateral	Lobo Sup Dir	Lobo Médio	Lobo Inf Dir	Lobo Sup Esq	Lobo Inf Esq	YES	0	1 - Leve (<25%)	Vidro Fosco Pura	#REF!	Aspecto Redondo	Pav Mosaico					Periferico	Dois ou Mais Lobos	Bilateral	Lobo Sup Dir	Lobo Médio	Lobo Inf Dir	Lobo Sup Esq	Lobo Inf Esq	YES	YES	NO	NO	NO	NO	NO	NO
383	<50	1	2020-03-14	POSITIVE FOR COVID	NO	0	NOrmal	Ausência de Opacidades							Ausência de Opacidades								Não	0	NOrmal	Ausência de Opacidades	#REF!							Ausência de Opacidades								YES	YES	YES	NO	NO	YES	NO	NO
384	<50	1	2020-03-13	POSITIVE FOR COVID	NO	0	1 - Leve (<25%)	Vidro Fosco Pura	Aspecto Redondo	Pav Mosaico					Periferico	Dois ou Mais Lobos	Bilateral	Lobo Sup Dir	Lobo Médio	Lobo Inf Dir	Lobo Sup Esq	Lobo Inf Esq	YES	0	1 - Leve (<25%)	Vidro Fosco Pura	#REF!	Aspecto Redondo	Pav Mosaico					Periferico	Dois ou Mais Lobos	Bilateral	Lobo Sup Dir	Lobo Médio	Lobo Inf Dir	Lobo Sup Esq	Lobo Inf Esq	NO	YES	YES	NO	NO	NO	NO	NO
385	<50	1	2020-03-10	POSITIVE FOR COVID	NO		1 - Leve (<25%)	Vidro Fosco Pura	Aspecto Redondo		Sinal do Halo Reverso				Periferico	Dois ou Mais Lobos	Bilateral	Lobo Sup Dir	Lobo Médio	Lobo Inf Dir	Lobo Sup Esq	Lobo Inf Esq	YES		1 - Leve (<25%)	Vidro Fosco Pura	#REF!	Aspecto Redondo		Sinal do Halo Reverso				Periferico	Dois ou Mais Lobos	Bilateral	Lobo Sup Dir	Lobo Médio	Lobo Inf Dir	Lobo Sup Esq	Lobo Inf Esq	NO	YES	YES	YES	NO	YES	NO	YES
386	<50	2	2020-03-22	POSITIVE FOR COVID	NO	1	1 - Leve (<25%)	Vidro Fosco Pura	Aspecto Redondo	Pav Mosaico					Periferico	Dois ou Mais Lobos	Bilateral	Lobo Sup Dir	Lobo Médio	Lobo Inf Dir	Lobo Sup Esq	Lobo Inf Esq	YES	1	1 - Leve (<25%)	Vidro Fosco Pura	#REF!	Aspecto Redondo	Pav Mosaico					Central e Periferico	Dois ou Mais Lobos	Bilateral	Lobo Sup Dir	Lobo Médio	Lobo Inf Dir	Lobo Sup Esq	Lobo Inf Esq	YES	YES	YES	YES	YES	NO	NO	NO
387	61-70	2	2020-04-02	POSITIVE FOR COVID	NO		2 - Moderado (25-50%)	Vidro Fosco e Consolidação		Pav Mosaico		Espessamento Brônquico			Periferico	Dois ou Mais Lobos	Bilateral	Lobo Sup Dir	Lobo Médio	Lobo Inf Dir	Lobo Sup Esq	Lobo Inf Esq					#REF!								Unico Lobo	Unilateral						YES	YES	YES	NO	NO	NO	YES	NO
388	61-70	2	2020-03-21	POSITIVE FOR COVID	NO	4	2 - Moderado (25-50%)	Vidro Fosco e Consolidação	Aspecto Redondo	Pav Mosaico		Espessamento Brônquico			Central e Periferico	Dois ou Mais Lobos	Bilateral	Lobo Sup Dir	Lobo Médio	Lobo Inf Dir	Lobo Sup Esq	Lobo Inf Esq		4			#REF!								Unico Lobo	Unilateral						NO	NO	YES	NO	NO	NO	NO	NO
389	51-60	2	2020-03-12	POSITIVE FOR COVID	YES		Grave (>50%)	Vidro Fosco Pura	Aspecto Redondo	Pav Mosaico					Central e Periferico	Dois ou Mais Lobos	Bilateral	Lobo Sup Dir	Lobo Médio	Lobo Inf Dir	Lobo Sup Esq	Lobo Inf Esq					#REF!								Unico Lobo	Unilateral						NO	NO	YES	NO	NO	NO	NO	YES
390	71-80	1	2020-03-22	POSITIVE FOR COVID	NO	0	1 - Leve (<25%)	Vidro Fosco Pura	Aspecto Redondo	Pav Mosaico		Espessamento Brônquico			Periferico	Dois ou Mais Lobos	Bilateral	Lobo Sup Dir	Lobo Médio	Lobo Inf Dir	Lobo Sup Esq	Lobo Inf Esq		0			#REF!								Unico Lobo	Unilateral						YES	YES	YES	NO	NO	NO	NO	NO
391	<50	2	2020-03-10	POSITIVE FOR COVID	NO		1 - Leve (<25%)	Vidro Fosco Pura	Aspecto Redondo	Pav Mosaico					Periferico	Dois ou Mais Lobos	Bilateral	Lobo Sup Dir	Lobo Médio	Lobo Inf Dir	Lobo Sup Esq	Lobo Inf Esq	YES		1 - Leve (<25%)	Vidro Fosco Pura	#REF!	Aspecto Redondo	Pav Mosaico					Periferico	Dois ou Mais Lobos	Bilateral	Lobo Sup Dir	Lobo Médio	Lobo Inf Dir	Lobo Sup Esq	Lobo Inf Esq	YES	YES	NO	NO	NO	NO	NO	YES
392	61-70	3	2020-03-02	POSITIVE FOR COVID	YES	4	1 - Leve (<25%)	Vidro Fosco Pura		Pav Mosaico		Espessamento Brônquico			Periferico	Dois ou Mais Lobos	Bilateral	Lobo Sup Dir	Lobo Médio	Lobo Inf Dir	Lobo Sup Esq	Lobo Inf Esq	YES	4	1 - Leve (<25%)	Vidro Fosco Pura	#REF!		Pav Mosaico		Espessamento Brônquico			Periferico	Dois ou Mais Lobos	Bilateral	Lobo Sup Dir	Lobo Médio	Lobo Inf Dir	Lobo Sup Esq	Lobo Inf Esq	NO	YES	YES	YES	YES	NO	NO	NO
393	>80	3	2020-04-02	POSITIVE FOR COVID	NO		Grave (>50%)	Vidro Fosco e Consolidação	Aspecto Redondo	Pav Mosaico	Sinal do Halo Reverso	Espessamento Brônquico			Central e Periferico	Dois ou Mais Lobos	Bilateral	Lobo Sup Dir	Lobo Médio	Lobo Inf Dir	Lobo Sup Esq	Lobo Inf Esq					#REF!								Unico Lobo	Unilateral						YES	NO	YES	YES	NO	NO	NO	NO
394	71-80	3	2020-03-31	POSITIVE FOR COVID	YES	4	1 - Leve (<25%)	Vidro Fosco e Consolidação		Pav Mosaico		Espessamento Brônquico	Derrame Pleural		Central e Periferico	Dois ou Mais Lobos	Bilateral			Lobo Inf Dir		Lobo Inf Esq		4			#REF!								Unico Lobo	Unilateral						YES	NO	NO	NO	NO	NO	YES	YES
395	61-70	2	2020-03-14	POSITIVE FOR COVID	NO		1 - Leve (<25%)	Vidro Fosco Pura	Aspecto Redondo	Pav Mosaico					Central e Periferico	Dois ou Mais Lobos	Bilateral	Lobo Sup Dir	Lobo Médio	Lobo Inf Dir	Lobo Sup Esq	Lobo Inf Esq	YES		1 - Leve (<25%)	Vidro Fosco Pura	#REF!	Aspecto Redondo	Pav Mosaico					Central e Periferico	Dois ou Mais Lobos	Bilateral	Lobo Sup Dir	Lobo Médio	Lobo Inf Dir	Lobo Sup Esq	Lobo Inf Esq	NO	NO	YES	YES	NO	NO	NO	NO
396	>80	3	2020-03-31	POSITIVE FOR COVID	YES	5	Grave (>50%)	Vidro Fosco e Consolidação		Pav Mosaico		Espessamento Brônquico			Central e Periferico	Dois ou Mais Lobos	Bilateral	Lobo Sup Dir	Lobo Médio	Lobo Inf Dir	Lobo Sup Esq	Lobo Inf Esq		5			#REF!								Unico Lobo	Unilateral						NO	NO	NO	NO	NO	NO	YES	NO
397	<50	1	2020-03-24	POSITIVE FOR COVID	NO	0	Não Se Aplica	Ausência de Opacidades				Espessamento Brônquico			Ausência de Opacidades									0			#REF!								Unico Lobo	Unilateral						YES	YES	YES	NO	NO	YES	NO	YES
398	61-70	2	2020-02-24	POSITIVE FOR COVID	NO	0	1 - Leve (<25%)	Vidro Fosco Pura	Aspecto Redondo	Pav Mosaico					Periferico	Unico Lobo	Unilateral			Lobo Inf Dir				0			#REF!								Unico Lobo	Unilateral						NO	NO	NO	NO	YES	NO	YES	YES
399	71-80	2	2020-03-20	POSITIVE FOR COVID	NO		1 - Leve (<25%)	Vidro Fosco Pura	Aspecto Redondo	Pav Mosaico		Espessamento Brônquico			Periferico	Dois ou Mais Lobos	Bilateral	Lobo Sup Dir	Lobo Médio	Lobo Inf Dir	Lobo Sup Esq	Lobo Inf Esq					#REF!								Unico Lobo	Unilateral						YES	NO	YES	NO	NO	NO	NO	NO
400	61-70	1	2020-03-10	POSITIVE FOR COVID	NO	0	1 - Leve (<25%)	Vidro Fosco Pura				Espessamento Brônquico			Central e Periferico	Unico Lobo	Unilateral			Lobo Inf Dir			Duvidosa	0	1 - Leve (<25%)	Vidro Fosco Pura	#REF!				Espessamento Brônquico			Central e Periferico	Unico Lobo	Unilateral			Lobo Inf Dir			YES	YES	YES	NO	NO	NO	NO	NO
401	61-70	2	2020-03-05	POSITIVE FOR COVID	NO	1	2 - Moderado (25-50%)	Vidro Fosco e Consolidação		Pav Mosaico	Sinal do Halo Reverso	Espessamento Brônquico			Central e Periferico	Dois ou Mais Lobos	Bilateral	Lobo Sup Dir	Lobo Médio	Lobo Inf Dir	Lobo Sup Esq	Lobo Inf Esq	YES	1	2 - Moderado (25-50%)	Vidro Fosco Pura	#REF!		Pav Mosaico	Sinal do Halo Reverso	Espessamento Brônquico			Central e Periferico	Dois ou Mais Lobos	Bilateral	Lobo Sup Dir	Lobo Médio	Lobo Inf Dir	Lobo Sup Esq	Lobo Inf Esq	YES	NO	NO	YES	NO	NO	YES	YES
402	61-70	2	2020-03-10	POSITIVE FOR COVID	NO	0	2 - Moderado (25-50%)	Vidro Fosco Pura	Aspecto Redondo	Pav Mosaico		Espessamento Brônquico			Central e Periferico	Dois ou Mais Lobos	Bilateral	Lobo Sup Dir	Lobo Médio	Lobo Inf Dir	Lobo Sup Esq	Lobo Inf Esq	YES	0	2 - Moderado (25-50%)	Vidro Fosco Pura	#REF!	Aspecto Redondo	Pav Mosaico		Espessamento Brônquico			Central e Periferico	Dois ou Mais Lobos	Bilateral	Lobo Sup Dir	Lobo Médio	Lobo Inf Dir	Lobo Sup Esq	Lobo Inf Esq	YES	YES	YES	NO	NO	NO	NO	NO
403	71-80	2	2020-03-27	POSITIVE FOR COVID	NO	1	1 - Leve (<25%)	Vidro Fosco e Consolidação		Pav Mosaico		Espessamento Brônquico			Central e Periferico	Dois ou Mais Lobos	Bilateral	Lobo Sup Dir	Lobo Médio	Lobo Inf Dir	Lobo Sup Esq			1			#REF!								Unico Lobo	Unilateral						NO	YES	YES	YES	NO	NO	NO	NO
404	61-70	1	2020-03-13	POSITIVE FOR COVID	NO		1 - Leve (<25%)	Vidro Fosco Pura	Aspecto Redondo						Central e Periferico	Dois ou Mais Lobos	Unilateral				Lobo Sup Esq	Lobo Inf Esq	YES		1 - Leve (<25%)	Vidro Fosco Pura	#REF!	Aspecto Redondo			Espessamento Brônquico			Central e Periferico	Dois ou Mais Lobos	Unilateral				Lobo Sup Esq	Lobo Inf Esq	NO	YES	YES	NO	NO	NO	NO	NO
405	>80	2	2020-03-12	POSITIVE FOR COVID	YES	4	Grave (>50%)	Vidro Fosco e Consolidação		Pav Mosaico		Espessamento Brônquico			Central e Periferico	Dois ou Mais Lobos	Bilateral	Lobo Sup Dir	Lobo Médio	Lobo Inf Dir	Lobo Sup Esq	Lobo Inf Esq	YES	4	Grave (>50%)	Vidro Fosco Pura	#REF!		Pav Mosaico		Espessamento Brônquico			Central e Periferico	Dois ou Mais Lobos	Bilateral	Lobo Sup Dir	Lobo Médio	Lobo Inf Dir	Lobo Sup Esq	Lobo Inf Esq	YES	NO	YES	NO	NO	NO	YES	NO
406	>80	3	2020-03-25	POSITIVE FOR COVID	NO	1	Grave (>50%)	Vidro Fosco e Consolidação	Aspecto Redondo	Pav Mosaico		Espessamento Brônquico			Central e Periferico	Dois ou Mais Lobos	Bilateral	Lobo Sup Dir	Lobo Médio	Lobo Inf Dir	Lobo Sup Esq	Lobo Inf Esq		1			#REF!								Unico Lobo	Unilateral						YES	YES	YES	NO	NO	NO	NO	NO
407	>80	2	2020-03-31	POSITIVE FOR COVID	NO	0	Grave (>50%)	Vidro Fosco e Consolidação		Pav Mosaico	Sinal do Halo Reverso	Espessamento Brônquico			Central e Periferico	Dois ou Mais Lobos	Bilateral	Lobo Sup Dir	Lobo Médio	Lobo Inf Dir	Lobo Sup Esq	Lobo Inf Esq		0			#REF!								Unico Lobo	Unilateral						NO	NO	NO	NO	NO	NO	YES	NO
408	51-60	1	2020-04-03	POSITIVE FOR COVID	NO	0	1 - Leve (<25%)	Vidro Fosco e Consolidação	Aspecto Redondo	Pav Mosaico		Espessamento Brônquico			Periferico	Unico Lobo	Unilateral				Lobo Sup Esq			0			#REF!								Unico Lobo	Unilateral						NO	NO	NO	NO	NO	NO	NO	NO
409	71-80	2	2020-03-11	POSITIVE FOR COVID	NO	1	2 - Moderado (25-50%)	Vidro Fosco e Consolidação		Pav Mosaico	Sinal do Halo Reverso				Central e Periferico	Dois ou Mais Lobos	Bilateral	Lobo Sup Dir	Lobo Médio	Lobo Inf Dir	Lobo Sup Esq	Lobo Inf Esq	YES	1	2 - Moderado (25-50%)	Vidro Fosco Pura	#REF!		Pav Mosaico	Sinal do Halo Reverso				Central e Periferico	Dois ou Mais Lobos	Bilateral	Lobo Sup Dir	Lobo Médio	Lobo Inf Dir	Lobo Sup Esq	Lobo Inf Esq	NO	NO	YES	NO	NO	YES	YES	YES
410	61-70	2	2020-03-27	POSITIVE FOR COVID	NO	3	2 - Moderado (25-50%)	Vidro Fosco Pura		Pav Mosaico		Espessamento Brônquico			Central e Periferico	Dois ou Mais Lobos	Bilateral	Lobo Sup Dir	Lobo Médio	Lobo Inf Dir	Lobo Sup Esq	Lobo Inf Esq		3			#REF!								Unico Lobo	Unilateral						YES	YES	YES	YES	NO	NO	YES	YES
411	>80	3	2020-03-23	POSITIVE FOR COVID	NO	4	1 - Leve (<25%)	Vidro Fosco e Consolidação	Aspecto Redondo	Pav Mosaico	Sinal do Halo Reverso				Central e Periferico	Dois ou Mais Lobos	Bilateral	Lobo Sup Dir		Lobo Inf Dir	Lobo Sup Esq	Lobo Inf Esq		4			#REF!								Unico Lobo	Unilateral						YES	YES	YES	NO	NO	NO	NO	NO
412	61-70	2	2020-03-19	POSITIVE FOR COVID	NO	1	2 - Moderado (25-50%)	Vidro Fosco e Consolidação	Aspecto Redondo	Pav Mosaico	Sinal do Halo Reverso	Espessamento Brônquico			Periferico	Dois ou Mais Lobos	Bilateral	Lobo Sup Dir	Lobo Médio	Lobo Inf Dir	Lobo Sup Esq	Lobo Inf Esq		1			#REF!								Unico Lobo	Unilateral						YES	YES	YES	NO	YES	YES	NO	NO
413	61-70	1	2020-03-16	POSITIVE FOR COVID	NO	0	1 - Leve (<25%)	Vidro Fosco Pura	Aspecto Redondo	Pav Mosaico		Espessamento Brônquico			Central e Periferico	Dois ou Mais Lobos	Bilateral	Lobo Sup Dir	Lobo Médio	Lobo Inf Dir	Lobo Sup Esq	Lobo Inf Esq	YES	0	1 - Leve (<25%)	Vidro Fosco Pura	#REF!	Aspecto Redondo	Pav Mosaico	Sinal do Halo Reverso	Espessamento Brônquico			Central e Periferico	Dois ou Mais Lobos	Bilateral	Lobo Sup Dir	Lobo Médio	Lobo Inf Dir	Lobo Sup Esq	Lobo Inf Esq	NO	NO	YES	YES	NO	YES	NO	NO
414	>80	1	2020-03-02	POSITIVE FOR COVID	YES		1 - Leve (<25%)	Vidro Fosco e Consolidação		Pav Mosaico		Espessamento Brônquico			Central e Periferico	Dois ou Mais Lobos	Bilateral	Lobo Sup Dir	Lobo Médio	Lobo Inf Dir		Lobo Inf Esq					#REF!								Unico Lobo	Unilateral						YES	YES	YES	NO	NO	NO	NO	NO
415	61-70	1	2020-03-16	POSITIVE FOR COVID	NO	0	1 - Leve (<25%)	Vidro Fosco Pura			Sinal do Halo Reverso	Espessamento Brônquico			Central e Periferico	Dois ou Mais Lobos	Bilateral	Lobo Sup Dir	Lobo Médio	Lobo Inf Dir	Lobo Sup Esq	Lobo Inf Esq	YES	0	2 - Moderado (25-50%)	Vidro Fosco Pura	#REF!		Pav Mosaico		Espessamento Brônquico			Central e Periferico	Dois ou Mais Lobos	Bilateral	Lobo Sup Dir	Lobo Médio	Lobo Inf Dir	Lobo Sup Esq	Lobo Inf Esq	YES	YES	YES	YES	NO	NO	NO	NO
416	>80	2	2020-03-16	POSITIVE FOR COVID	NO		2 - Moderado (25-50%)	Vidro Fosco e Consolidação		Pav Mosaico	Sinal do Halo Reverso		Derrame Pleural		Central e Periferico	Dois ou Mais Lobos	Bilateral	Lobo Sup Dir	Lobo Médio	Lobo Inf Dir	Lobo Sup Esq	Lobo Inf Esq					#REF!								Unico Lobo	Unilateral						NO	YES	YES	YES	NO	NO	YES	YES
417	71-80	2	2020-03-18	POSITIVE FOR COVID	NO	1	2 - Moderado (25-50%)	Vidro Fosco e Consolidação	Aspecto Redondo	Pav Mosaico					Central e Periferico	Dois ou Mais Lobos	Bilateral	Lobo Sup Dir	Lobo Médio	Lobo Inf Dir	Lobo Sup Esq	Lobo Inf Esq		1			#REF!								Unico Lobo	Unilateral						NO	YES	YES	YES	NO	NO	YES	YES
418	71-80	3	2020-03-15	POSITIVE FOR COVID	NO	4	Grave (>50%)	Vidro Fosco Pura	Aspecto Redondo	Pav Mosaico		Espessamento Brônquico			Central e Periferico	Dois ou Mais Lobos	Bilateral	Lobo Sup Dir	Lobo Médio	Lobo Inf Dir	Lobo Sup Esq	Lobo Inf Esq		4			#REF!								Unico Lobo	Unilateral						YES	YES	YES	NO	NO	NO	NO	NO
419	61-70	2	2020-03-01	POSITIVE FOR COVID	YES		1 - Leve (<25%)	Vidro Fosco e Consolidação	Aspecto Redondo	Pav Mosaico	Sinal do Halo Reverso				Central e Periferico	Dois ou Mais Lobos	Bilateral	Lobo Sup Dir	Lobo Médio	Lobo Inf Dir	Lobo Sup Esq	Lobo Inf Esq					#REF!								Unico Lobo	Unilateral						YES	YES	YES	NO	NO	NO	NO	NO
420	>80	2	2020-03-29	POSITIVE FOR COVID	NO		2 - Moderado (25-50%)	Vidro Fosco e Consolidação		Pav Mosaico		Espessamento Brônquico	Derrame Pleural		Central e Periferico	Dois ou Mais Lobos	Bilateral	Lobo Sup Dir	Lobo Médio	Lobo Inf Dir	Lobo Sup Esq	Lobo Inf Esq					#REF!								Unico Lobo	Unilateral						YES	YES	YES	YES	NO	NO	NO	NO
421	61-70	2	2020-03-14	POSITIVE FOR COVID	YES		2 - Moderado (25-50%)	Vidro Fosco e Consolidação	Aspecto Redondo	Pav Mosaico		Espessamento Brônquico			Central e Periferico	Dois ou Mais Lobos	Bilateral	Lobo Sup Dir	Lobo Médio	Lobo Inf Dir	Lobo Sup Esq	Lobo Inf Esq	YES		2 - Moderado (25-50%)	Vidro Fosco e Consolidação	#REF!	Aspecto Redondo	Pav Mosaico		Espessamento Brônquico	Derrame Pleural		Central e Periferico	Dois ou Mais Lobos	Bilateral	Lobo Sup Dir	Lobo Médio	Lobo Inf Dir	Lobo Sup Esq	Lobo Inf Esq	YES	YES	YES	NO	YES	NO	NO	NO
422	71-80	2	2020-03-27	POSITIVE FOR COVID	YES	0	1 - Leve (<25%)	Vidro Fosco e Consolidação	Aspecto Redondo	Pav Mosaico	Sinal do Halo Reverso	Espessamento Brônquico			Periferico	Dois ou Mais Lobos	Bilateral		Lobo Médio	Lobo Inf Dir	Lobo Sup Esq	Lobo Inf Esq		0			#REF!								Unico Lobo	Unilateral						NO	YES	NO	NO	NO	NO	NO	NO
423	<50	1	2020-04-01	POSITIVE FOR COVID	NO	0	1 - Leve (<25%)	Vidro Fosco e Consolidação	Aspecto Redondo		Sinal do Halo Reverso				Central e Periferico	Unico Lobo	Unilateral			Lobo Inf Dir				0			#REF!								Unico Lobo	Unilateral						NO	YES	YES	NO	YES	NO	NO	NO
424	61-70	2	2020-04-04	POSITIVE FOR COVID	NO		Grave (>50%)	Vidro Fosco Pura		Pav Mosaico		Espessamento Brônquico	Derrame Pleural		Central e Periferico	Dois ou Mais Lobos	Bilateral	Lobo Sup Dir	Lobo Médio	Lobo Inf Dir	Lobo Sup Esq	Lobo Inf Esq					#REF!								Unico Lobo	Unilateral						YES	YES	YES	YES	NO	NO	NO	NO
425	71-80	2	2020-03-28	POSITIVE FOR COVID	NO	1	1 - Leve (<25%)	Vidro Fosco e Consolidação		Pav Mosaico		Espessamento Brônquico			Central e Periferico	Dois ou Mais Lobos	Bilateral	Lobo Sup Dir	Lobo Médio	Lobo Inf Dir	Lobo Sup Esq	Lobo Inf Esq		1			#REF!								Unico Lobo	Unilateral						YES	NO	YES	NO	NO	NO	NO	NO
426	71-80	1	2020-03-26	POSITIVE FOR COVID	NO		1 - Leve (<25%)	Vidro Fosco e Consolidação	Aspecto Redondo	Pav Mosaico	Sinal do Halo Reverso	Espessamento Brônquico			Periferico	Dois ou Mais Lobos	Bilateral	Lobo Sup Dir	Lobo Médio	Lobo Inf Dir	Lobo Sup Esq	Lobo Inf Esq					#REF!								Unico Lobo	Unilateral						NO	NO	YES	NO	YES	NO	NO	YES
427	71-80	3	2020-03-09	POSITIVE FOR COVID	NO		1 - Leve (<25%)	Vidro Fosco e Consolidação		Pav Mosaico		Espessamento Brônquico	Derrame Pleural		Periferico	Dois ou Mais Lobos	Bilateral			Lobo Inf Dir		Lobo Inf Esq					#REF!								Unico Lobo	Unilateral						YES	YES	YES	NO	NO	NO	NO	NO
428	71-80	3	2020-03-14	POSITIVE FOR COVID	YES	1	Grave (>50%)	Vidro Fosco Pura	Aspecto Redondo	Pav Mosaico	Sinal do Halo Reverso	Espessamento Brônquico			Central e Periferico	Dois ou Mais Lobos	Bilateral	Lobo Sup Dir	Lobo Médio	Lobo Inf Dir	Lobo Sup Esq	Lobo Inf Esq	YES	1	Grave (>50%)	Vidro Fosco Pura	#REF!	Aspecto Redondo	Pav Mosaico	Sinal do Halo Reverso	Espessamento Brônquico			Central e Periferico	Dois ou Mais Lobos	Bilateral	Lobo Sup Dir	Lobo Médio	Lobo Inf Dir	Lobo Sup Esq	Lobo Inf Esq	YES	NO	NO	NO	NO	NO	NO	NO
429	71-80	2	2020-03-23	POSITIVE FOR COVID	NO	5	Grave (>50%)	Vidro Fosco e Consolidação	Aspecto Redondo	Pav Mosaico	Sinal do Halo Reverso	Espessamento Brônquico			Periferico	Dois ou Mais Lobos	Bilateral	Lobo Sup Dir	Lobo Médio	Lobo Inf Dir	Lobo Sup Esq	Lobo Inf Esq		5			#REF!								Unico Lobo	Unilateral						YES	NO	YES	NO	NO	NO	NO	NO
430	71-80	1	2020-03-22	POSITIVE FOR COVID	NO	1	2 - Moderado (25-50%)	Vidro Fosco Pura		Pav Mosaico	Sinal do Halo Reverso	Espessamento Brônquico			Central e Periferico	Dois ou Mais Lobos	Bilateral	Lobo Sup Dir	Lobo Médio	Lobo Inf Dir	Lobo Sup Esq	Lobo Inf Esq		1			#REF!								Unico Lobo	Unilateral						NO	YES	YES	YES	NO	NO	NO	YES
431	<50	1	2020-03-12	POSITIVE FOR COVID	NO	0	1 - Leve (<25%)	Vidro Fosco Pura	Aspecto Redondo	Pav Mosaico					Periferico	Dois ou Mais Lobos	Bilateral	Lobo Sup Dir	Lobo Médio	Lobo Inf Dir	Lobo Sup Esq	Lobo Inf Esq	YES	0	1 - Leve (<25%)	Vidro Fosco Pura	#REF!	Aspecto Redondo	Pav Mosaico					Periferico	Dois ou Mais Lobos	Bilateral	Lobo Sup Dir	Lobo Médio	Lobo Inf Dir	Lobo Sup Esq	Lobo Inf Esq	NO	YES	NO	NO	YES	NO	NO	YES
432	61-70	1	2020-03-29	POSITIVE FOR COVID	NO	1	1 - Leve (<25%)	Vidro Fosco Pura	Aspecto Redondo	Pav Mosaico		Espessamento Brônquico			Periferico	Dois ou Mais Lobos	Bilateral	Lobo Sup Dir	Lobo Médio	Lobo Inf Dir	Lobo Sup Esq	Lobo Inf Esq		1			#REF!								Unico Lobo	Unilateral						NO	YES	NO	YES	NO	NO	NO	NO
433	>80	2	2020-04-04	POSITIVE FOR COVID	YES	4	2 - Moderado (25-50%)	Consolidação Pura		Pav Mosaico		Espessamento Brônquico	Derrame Pleural		Central e Periferico	Dois ou Mais Lobos	Bilateral	Lobo Sup Dir	Lobo Médio	Lobo Inf Dir	Lobo Sup Esq	Lobo Inf Esq		4			#REF!								Unico Lobo	Unilateral						NO	NO	NO	NO	NO	NO	NO	NO
434	61-70	2	2020-03-15	POSITIVE FOR COVID	NO	0	1 - Leve (<25%)	Vidro Fosco Pura	Aspecto Redondo	Pav Mosaico					Periferico	Dois ou Mais Lobos	Bilateral	Lobo Sup Dir	Lobo Médio	Lobo Inf Dir	Lobo Sup Esq	Lobo Inf Esq	YES	0	1 - Leve (<25%)	Vidro Fosco Pura	#REF!	Aspecto Redondo	Pav Mosaico					Periferico	Dois ou Mais Lobos	Bilateral	Lobo Sup Dir	Lobo Médio	Lobo Inf Dir	Lobo Sup Esq	Lobo Inf Esq	NO	YES	YES	NO	NO	NO	NO	NO
435	51-60	3	2020-03-12	POSITIVE FOR COVID	NO	4	Grave (>50%)	Vidro Fosco e Consolidação	Aspecto Redondo	Pav Mosaico		Espessamento Brônquico			Central e Periferico	Dois ou Mais Lobos	Bilateral	Lobo Sup Dir	Lobo Médio	Lobo Inf Dir	Lobo Sup Esq	Lobo Inf Esq		4			#REF!								Unico Lobo	Unilateral						NO	NO	YES	NO	NO	NO	NO	NO
436	71-80	2	2020-03-24	POSITIVE FOR COVID	YES	4	2 - Moderado (25-50%)	Vidro Fosco e Consolidação		Pav Mosaico		Espessamento Brônquico			Central e Periferico	Dois ou Mais Lobos	Bilateral	Lobo Sup Dir		Lobo Inf Dir	Lobo Sup Esq	Lobo Inf Esq		4			#REF!								Unico Lobo	Unilateral						YES	YES	YES	NO	NO	NO	NO	NO
437	71-80	2	2020-03-16	POSITIVE FOR COVID	YES		1 - Leve (<25%)	Vidro Fosco e Consolidação	Aspecto Redondo	Pav Mosaico	Sinal do Halo Reverso				Periferico	Dois ou Mais Lobos	Bilateral	Lobo Sup Dir		Lobo Inf Dir		Lobo Inf Esq					#REF!								Unico Lobo	Unilateral						YES	NO	YES	NO	NO	NO	NO	NO
438	<50	1	2020-03-25	POSITIVE FOR COVID	NO	0	1 - Leve (<25%)	Vidro Fosco Pura	Aspecto Redondo	Pav Mosaico		Espessamento Brônquico			Periferico	Dois ou Mais Lobos	Bilateral		Lobo Médio	Lobo Inf Dir		Lobo Inf Esq		0			#REF!								Unico Lobo	Unilateral						NO	YES	YES	NO	NO	NO	NO	NO
439	61-70	1	2020-03-13	POSITIVE FOR COVID	NO	0	Não Se Aplica	Ausência de Opacidades				Espessamento Brônquico			Ausência de Opacidades								Não	0	Não Se Aplica	Ausência de Opacidades	#REF!				Espessamento Brônquico			Ausência de Opacidades								YES	YES	NO	NO	NO	NO	NO	NO
440	71-80	2	2020-04-03	POSITIVE FOR COVID	NO	0	1 - Leve (<25%)	Vidro Fosco e Consolidação	Aspecto Redondo	Pav Mosaico	Sinal do Halo Reverso	Espessamento Brônquico			Periferico	Dois ou Mais Lobos	Bilateral		Lobo Médio	Lobo Inf Dir	Lobo Sup Esq	Lobo Inf Esq		0			#REF!								Unico Lobo	Unilateral						NO	YES	YES	YES	NO	NO	YES	YES
441	71-80	2	2020-03-14	POSITIVE FOR COVID	NO	1	Grave (>50%)	Vidro Fosco Pura		Pav Mosaico					Central e Periferico	Dois ou Mais Lobos	Bilateral	Lobo Sup Dir	Lobo Médio	Lobo Inf Dir	Lobo Sup Esq	Lobo Inf Esq	YES	1	Grave (>50%)	Vidro Fosco Pura	#REF!		Pav Mosaico					Central e Periferico	Dois ou Mais Lobos	Bilateral	Lobo Sup Dir	Lobo Médio	Lobo Inf Dir	Lobo Sup Esq	Lobo Inf Esq	YES	YES	NO	NO	YES	NO	NO	NO
442	>80	2	2020-03-13	POSITIVE FOR COVID	NO	1	1 - Leve (<25%)	Vidro Fosco Pura		Pav Mosaico		Espessamento Brônquico			Periferico	Dois ou Mais Lobos	Bilateral	Lobo Sup Dir	Lobo Médio	Lobo Inf Dir	Lobo Sup Esq	Lobo Inf Esq	YES	1	1 - Leve (<25%)	Vidro Fosco Pura	#REF!		Pav Mosaico		Espessamento Brônquico			Periferico	Dois ou Mais Lobos	Bilateral	Lobo Sup Dir	Lobo Médio	Lobo Inf Dir	Lobo Sup Esq	Lobo Inf Esq	YES	YES	YES	YES	NO	NO	YES	NO
443	61-70	1	2020-03-02	POSITIVE FOR COVID	NO	4	1 - Leve (<25%)	Vidro Fosco e Consolidação	Aspecto Redondo	Pav Mosaico		Espessamento Brônquico			Central e Periferico	Dois ou Mais Lobos	Bilateral	Lobo Sup Dir	Lobo Médio	Lobo Inf Dir	Lobo Sup Esq	Lobo Inf Esq	YES	4	1 - Leve (<25%)	Vidro Fosco Pura	#REF!	Aspecto Redondo	Pav Mosaico		Espessamento Brônquico			Central e Periferico	Dois ou Mais Lobos	Bilateral	Lobo Sup Dir	Lobo Médio	Lobo Inf Dir	Lobo Sup Esq	Lobo Inf Esq	YES	YES	YES	NO	YES	NO	NO	NO
444	>80	3	2020-03-25	POSITIVE FOR COVID	YES		1 - Leve (<25%)	Vidro Fosco e Consolidação		Pav Mosaico		Espessamento Brônquico	Derrame Pleural	LinfadeNOmegalia	Central e Periferico	Dois ou Mais Lobos	Bilateral			Lobo Inf Dir	Lobo Sup Esq	Lobo Inf Esq					#REF!								Unico Lobo	Unilateral						YES	NO	YES	NO	NO	NO	NO	NO
445	>80	3	2020-03-23	POSITIVE FOR COVID	YES		Grave (>50%)	Vidro Fosco e Consolidação	Aspecto Redondo	Pav Mosaico					Central e Periferico	Dois ou Mais Lobos	Bilateral	Lobo Sup Dir	Lobo Médio	Lobo Inf Dir	Lobo Sup Esq	Lobo Inf Esq	YES		Grave (>50%)	Vidro Fosco e Consolidação	#REF!	Aspecto Redondo	Pav Mosaico	Sinal do Halo Reverso				Central e Periferico	Dois ou Mais Lobos	Bilateral	Lobo Sup Dir	Lobo Médio	Lobo Inf Dir	Lobo Sup Esq	Lobo Inf Esq	YES	YES	YES	NO	NO	NO	NO	NO
446	61-70	3	2020-03-17	POSITIVE FOR COVID	YES	1	Grave (>50%)	Vidro Fosco Pura	Aspecto Redondo	Pav Mosaico		Espessamento Brônquico			Central e Periferico	Dois ou Mais Lobos	Bilateral	Lobo Sup Dir	Lobo Médio	Lobo Inf Dir	Lobo Sup Esq	Lobo Inf Esq	YES	1	Grave (>50%)	Vidro Fosco Pura	#REF!	Aspecto Redondo	Pav Mosaico		Espessamento Brônquico			Central e Periferico	Dois ou Mais Lobos	Bilateral	Lobo Sup Dir	Lobo Médio	Lobo Inf Dir	Lobo Sup Esq	Lobo Inf Esq	YES	YES	YES	NO	NO	NO	NO	NO
447	71-80	2	2020-03-15	POSITIVE FOR COVID	NO	3	1 - Leve (<25%)	Vidro Fosco Pura	Aspecto Redondo	Pav Mosaico					Periferico	Dois ou Mais Lobos	Bilateral	Lobo Sup Dir	Lobo Médio	Lobo Inf Dir	Lobo Sup Esq	Lobo Inf Esq	YES	3	1 - Leve (<25%)	Vidro Fosco Pura	#REF!	Aspecto Redondo	Pav Mosaico					Periferico	Dois ou Mais Lobos	Bilateral	Lobo Sup Dir	Lobo Médio	Lobo Inf Dir	Lobo Sup Esq	Lobo Inf Esq	YES	YES	NO	NO	NO	NO	NO	NO
448	>80	1	2020-03-21	POSITIVE FOR COVID	NO	0	1 - Leve (<25%)	Vidro Fosco e Consolidação		Pav Mosaico		Espessamento Brônquico			Central e Periferico	Unico Lobo	Unilateral		Lobo Médio	Lobo Inf Dir		Lobo Inf Esq	Duvidosa	0	1 - Leve (<25%)	Vidro Fosco e Consolidação	#REF!		Pav Mosaico		Espessamento Brônquico			Central e Periferico	Dois ou Mais Lobos	Unilateral		Lobo Médio	Lobo Inf Dir		Lobo Inf Esq	NO	YES	NO	YES	NO	NO	NO	NO
449	>80	2	2020-03-19	POSITIVE FOR COVID	NO		2 - Moderado (25-50%)	Vidro Fosco e Consolidação	Aspecto Redondo	Pav Mosaico	Sinal do Halo Reverso	Espessamento Brônquico			Central e Periferico	Dois ou Mais Lobos	Bilateral	Lobo Sup Dir	Lobo Médio	Lobo Inf Dir	Lobo Sup Esq	Lobo Inf Esq					#REF!								Unico Lobo	Unilateral						YES	NO	YES	NO	NO	NO	YES	YES
450	>80	2	2020-03-19	POSITIVE FOR COVID	YES	1	2 - Moderado (25-50%)	Vidro Fosco e Consolidação				Espessamento Brônquico	Derrame Pleural		Central e Periferico	Dois ou Mais Lobos	Bilateral	Lobo Sup Dir	Lobo Médio	Lobo Inf Dir	Lobo Sup Esq		Duvidosa	1	2 - Moderado (25-50%)	Vidro Fosco e Consolidação	#REF!		Pav Mosaico		Espessamento Brônquico			Central e Periferico	Dois ou Mais Lobos	Bilateral	Lobo Sup Dir	Lobo Médio	Lobo Inf Dir	Lobo Sup Esq	Lobo Inf Esq	YES	NO	YES	YES	NO	NO	NO	NO
451	>80	2	2020-03-18	POSITIVE FOR COVID	YES	1	2 - Moderado (25-50%)	Vidro Fosco e Consolidação	Aspecto Redondo	Pav Mosaico		Espessamento Brônquico			Central e Periferico	Dois ou Mais Lobos	Bilateral	Lobo Sup Dir	Lobo Médio	Lobo Inf Dir	Lobo Sup Esq	Lobo Inf Esq	YES	1	2 - Moderado (25-50%)	Vidro Fosco e Consolidação	#REF!	Aspecto Redondo	Pav Mosaico		Espessamento Brônquico			Central e Periferico	Dois ou Mais Lobos	Bilateral	Lobo Sup Dir	Lobo Médio	Lobo Inf Dir	Lobo Sup Esq	Lobo Inf Esq	YES	NO	YES	NO	NO	NO	NO	NO
452	51-60	2	2020-03-27	POSITIVE FOR COVID	NO	5	2 - Moderado (25-50%)	Vidro Fosco Pura	Aspecto Redondo	Pav Mosaico	Sinal do Halo Reverso	Espessamento Brônquico			Central e Periferico	Dois ou Mais Lobos	Bilateral	Lobo Sup Dir	Lobo Médio	Lobo Inf Dir	Lobo Sup Esq	Lobo Inf Esq		5			#REF!								Unico Lobo	Unilateral						NO	NO	YES	YES	NO	NO	NO	YES
453	61-70	1	2020-03-27	POSITIVE FOR COVID	NO	0	1 - Leve (<25%)	Vidro Fosco Pura	Aspecto Redondo	Pav Mosaico		Espessamento Brônquico			Periferico	Dois ou Mais Lobos	Bilateral	Lobo Sup Dir	Lobo Médio	Lobo Inf Dir	Lobo Sup Esq	Lobo Inf Esq		0			#REF!								Unico Lobo	Unilateral						NO	NO	YES	NO	NO	NO	NO	NO
454	61-70	2	2020-03-21	POSITIVE FOR COVID	NO	1	2 - Moderado (25-50%)	Vidro Fosco Pura	Aspecto Redondo	Pav Mosaico	Sinal do Halo Reverso				Central e Periferico	Dois ou Mais Lobos	Bilateral	Lobo Sup Dir	Lobo Médio	Lobo Inf Dir	Lobo Sup Esq	Lobo Inf Esq		1			#REF!								Unico Lobo	Unilateral						NO	NO	YES	NO	NO	NO	YES	YES
455	>80	2	2020-03-16	POSITIVE FOR COVID	YES	4	Grave (>50%)	Vidro Fosco e Consolidação	Aspecto Redondo	Pav Mosaico			Derrame Pleural		Central e Periferico	Dois ou Mais Lobos	Bilateral	Lobo Sup Dir	Lobo Médio	Lobo Inf Dir	Lobo Sup Esq	Lobo Inf Esq	YES	4	Grave (>50%)	Vidro Fosco e Consolidação	#REF!	Aspecto Redondo	Pav Mosaico			Derrame Pleural		Central e Periferico	Dois ou Mais Lobos	Bilateral	Lobo Sup Dir	Lobo Médio	Lobo Inf Dir	Lobo Sup Esq	Lobo Inf Esq	YES	YES	YES	NO	NO	NO	NO	NO
456	61-70	2	2020-03-25	POSITIVE FOR COVID	NO	0	1 - Leve (<25%)	Vidro Fosco Pura	Aspecto Redondo	Pav Mosaico		Espessamento Brônquico			Central e Periferico	Dois ou Mais Lobos	Bilateral	Lobo Sup Dir	Lobo Médio	Lobo Inf Dir	Lobo Sup Esq	Lobo Inf Esq		0			#REF!								Unico Lobo	Unilateral						NO	YES	NO	YES	YES	NO	NO	NO
457	>80	1	2020-03-23	POSITIVE FOR COVID	NO	0	2 - Moderado (25-50%)	Vidro Fosco Pura	Aspecto Redondo	Pav Mosaico	Sinal do Halo Reverso				Periferico	Dois ou Mais Lobos	Bilateral	Lobo Sup Dir	Lobo Médio	Lobo Inf Dir	Lobo Sup Esq	Lobo Inf Esq	YES	0	2 - Moderado (25-50%)	Vidro Fosco Pura	#REF!	Aspecto Redondo	Pav Mosaico	Sinal do Halo Reverso				Periferico	Dois ou Mais Lobos	Bilateral	Lobo Sup Dir	Lobo Médio	Lobo Inf Dir	Lobo Sup Esq	Lobo Inf Esq	NO	NO	NO	NO	NO	NO	NO	NO
458	>80	2	2020-03-25	POSITIVE FOR COVID	YES	0	1 - Leve (<25%)	Vidro Fosco e Consolidação		Pav Mosaico		Espessamento Brônquico			Periferico	Dois ou Mais Lobos	Unilateral	Lobo Sup Dir	Lobo Médio	Lobo Inf Dir				0			#REF!								Unico Lobo	Unilateral						NO	YES	YES	NO	NO	NO	NO	NO
459	51-60	2	2020-03-22	POSITIVE FOR COVID	NO		1 - Leve (<25%)	Vidro Fosco Pura	Aspecto Redondo	Pav Mosaico					Periferico	Dois ou Mais Lobos	Bilateral	Lobo Sup Dir	Lobo Médio	Lobo Inf Dir	Lobo Sup Esq	Lobo Inf Esq					#REF!								Unico Lobo	Unilateral						YES	YES	YES	YES	NO	NO	NO	NO
460	61-70	2	2020-04-04	POSITIVE FOR COVID	NO	3	2 - Moderado (25-50%)	Vidro Fosco e Consolidação				Espessamento Brônquico	Derrame Pleural	LinfadeNOmegalia	Central e Periferico	Dois ou Mais Lobos	Bilateral	Lobo Sup Dir	Lobo Médio	Lobo Inf Dir	Lobo Sup Esq	Lobo Inf Esq		3			#REF!								Unico Lobo	Unilateral						YES	YES	NO	NO	NO	NO	NO	NO
461	71-80	2	2020-03-21	POSITIVE FOR COVID	NO		1 - Leve (<25%)	Vidro Fosco Pura		Pav Mosaico		Espessamento Brônquico			Periferico	Dois ou Mais Lobos	Bilateral	Lobo Sup Dir		Lobo Inf Dir	Lobo Sup Esq	Lobo Inf Esq	YES		1 - Leve (<25%)	Vidro Fosco Pura	#REF!	Aspecto Redondo	Pav Mosaico		Espessamento Brônquico			Periferico	Dois ou Mais Lobos	Bilateral	Lobo Sup Dir		Lobo Inf Dir	Lobo Sup Esq	Lobo Inf Esq	NO	YES	YES	NO	NO	NO	NO	NO
462	61-70	1	2020-03-09	POSITIVE FOR COVID	NO	0	1 - Leve (<25%)	Vidro Fosco Pura	Aspecto Redondo	Pav Mosaico	Sinal do Halo Reverso	Espessamento Brônquico			Periferico	Dois ou Mais Lobos	Bilateral	Lobo Sup Dir	Lobo Médio	Lobo Inf Dir	Lobo Sup Esq	Lobo Inf Esq	YES	0	1 - Leve (<25%)	Vidro Fosco Pura	#REF!	Aspecto Redondo	Pav Mosaico	Sinal do Halo Reverso	Espessamento Brônquico			Periferico	Dois ou Mais Lobos	Bilateral	Lobo Sup Dir	Lobo Médio	Lobo Inf Dir	Lobo Sup Esq	Lobo Inf Esq	YES	NO	YES	YES	YES	NO	YES	YES
463	51-60	1	2020-04-01	POSITIVE FOR COVID	NO		1 - Leve (<25%)	Vidro Fosco Pura	Aspecto Redondo	Pav Mosaico					Periferico	Unico Lobo	Unilateral			Lobo Inf Dir							#REF!								Unico Lobo	Unilateral						NO	NO	NO	NO	NO	NO	YES	NO
464	71-80	3	2020-03-15	POSITIVE FOR COVID	YES	3	1 - Leve (<25%)	Vidro Fosco e Consolidação	Aspecto Redondo	Pav Mosaico	Sinal do Halo Reverso	Espessamento Brônquico			Central e Periferico	Dois ou Mais Lobos	Bilateral	Lobo Sup Dir	Lobo Médio	Lobo Inf Dir	Lobo Sup Esq	Lobo Inf Esq	YES	3	1 - Leve (<25%)	Vidro Fosco e Consolidação	#REF!	Aspecto Redondo	Pav Mosaico	Sinal do Halo Reverso	Espessamento Brônquico			Central e Periferico	Dois ou Mais Lobos	Bilateral	Lobo Sup Dir	Lobo Médio	Lobo Inf Dir	Lobo Sup Esq	Lobo Inf Esq	YES	YES	YES	NO	NO	NO	NO	NO
465	71-80	2	2020-03-25	POSITIVE FOR COVID	YES		1 - Leve (<25%)	Vidro Fosco e Consolidação	Aspecto Redondo	Pav Mosaico		Espessamento Brônquico	Derrame Pleural		Periferico	Dois ou Mais Lobos	Bilateral	Lobo Sup Dir	Lobo Médio	Lobo Inf Dir	Lobo Sup Esq	Lobo Inf Esq					#REF!								Unico Lobo	Unilateral						NO	NO	NO	NO	NO	NO	NO	NO
466	61-70	3	2020-03-18	POSITIVE FOR COVID	NO	1	2 - Moderado (25-50%)	Vidro Fosco e Consolidação	Aspecto Redondo	Pav Mosaico	Sinal do Halo Reverso				Central e Periferico	Dois ou Mais Lobos	Bilateral	Lobo Sup Dir	Lobo Médio	Lobo Inf Dir	Lobo Sup Esq	Lobo Inf Esq	YES	1	2 - Moderado (25-50%)	Vidro Fosco e Consolidação	#REF!	Aspecto Redondo	Pav Mosaico	Sinal do Halo Reverso				Central e Periferico	Dois ou Mais Lobos	Bilateral	Lobo Sup Dir	Lobo Médio	Lobo Inf Dir	Lobo Sup Esq	Lobo Inf Esq	YES	YES	YES	NO	NO	NO	NO	NO
467	71-80	2	2020-03-15	POSITIVE FOR COVID	YES	1	1 - Leve (<25%)	Vidro Fosco Pura		Pav Mosaico					Central e Periferico	Dois ou Mais Lobos	Bilateral	Lobo Sup Dir	Lobo Médio	Lobo Inf Dir	Lobo Sup Esq	Lobo Inf Esq	YES	1	1 - Leve (<25%)	Vidro Fosco Pura	#REF!		Pav Mosaico					Central e Periferico	Dois ou Mais Lobos	Bilateral	Lobo Sup Dir	Lobo Médio	Lobo Inf Dir	Lobo Sup Esq	Lobo Inf Esq	YES	NO	YES	NO	NO	NO	NO	YES
468	>80	2	2020-03-18	POSITIVE FOR COVID	NO	0	1 - Leve (<25%)	Vidro Fosco Pura		Pav Mosaico		Espessamento Brônquico			Central e Periferico	Dois ou Mais Lobos	Bilateral			Lobo Inf Dir	Lobo Sup Esq	Lobo Inf Esq		0			#REF!								Unico Lobo	Unilateral						NO	YES	YES	NO	NO	NO	YES	YES
469	<50	1	2020-04-01	POSITIVE FOR COVID	NO	0	NOrmal	Ausência de Opacidades							Ausência de Opacidades									0			#REF!								Unico Lobo	Unilateral						NO	YES	YES	YES	NO	NO	YES	NO
470	51-60	1	2020-03-23	POSITIVE FOR COVID	NO	0	1 - Leve (<25%)	Vidro Fosco Pura	Aspecto Redondo	Pav Mosaico	Sinal do Halo Reverso	Espessamento Brônquico			Periferico	Dois ou Mais Lobos	Bilateral	Lobo Sup Dir	Lobo Médio	Lobo Inf Dir	Lobo Sup Esq	Lobo Inf Esq		0			#REF!								Unico Lobo	Unilateral						NO	YES	YES	NO	NO	NO	NO	NO
471	51-60	2	2020-03-30	POSITIVE FOR COVID	NO	0	1 - Leve (<25%)	Vidro Fosco e Consolidação	Aspecto Redondo	Pav Mosaico		Espessamento Brônquico			Periferico	Dois ou Mais Lobos	Bilateral	Lobo Sup Dir	Lobo Médio	Lobo Inf Dir	Lobo Sup Esq	Lobo Inf Esq		0			#REF!								Unico Lobo	Unilateral						YES	YES	YES	NO	NO	NO	NO	NO
472	71-80	2	2020-03-18	POSITIVE FOR COVID	NO	4	2 - Moderado (25-50%)	Vidro Fosco Pura	Aspecto Redondo	Pav Mosaico		Espessamento Brônquico			Central e Periferico	Dois ou Mais Lobos	Bilateral	Lobo Sup Dir	Lobo Médio	Lobo Inf Dir	Lobo Sup Esq	Lobo Inf Esq		4			#REF!								Unico Lobo	Unilateral						YES	YES	YES	NO	NO	NO	NO	YES
473	>80	3	2020-03-13	POSITIVE FOR COVID	YES	3	1 - Leve (<25%)	Consolidação Pura		Pav Mosaico		Espessamento Brônquico	Derrame Pleural		Periferico	Unico Lobo	Unilateral			Lobo Inf Dir				3			#REF!								Unico Lobo	Unilateral						YES	NO	YES	NO	NO	NO	YES	YES
474	61-70	2	2020-03-29	POSITIVE FOR COVID	NO	1	1 - Leve (<25%)	Vidro Fosco Pura	Aspecto Redondo	Pav Mosaico	Sinal do Halo Reverso	Espessamento Brônquico			Periferico	Dois ou Mais Lobos	Bilateral	Lobo Sup Dir	Lobo Médio	Lobo Inf Dir	Lobo Sup Esq	Lobo Inf Esq		1			#REF!								Unico Lobo	Unilateral						NO	NO	YES	NO	NO	NO	YES	NO
475	61-70	2	2020-03-10	POSITIVE FOR COVID	NO	4	2 - Moderado (25-50%)	Vidro Fosco e Consolidação	Aspecto Redondo	Pav Mosaico	Sinal do Halo Reverso	Espessamento Brônquico			Central e Periferico	Dois ou Mais Lobos	Bilateral	Lobo Sup Dir	Lobo Médio	Lobo Inf Dir	Lobo Sup Esq	Lobo Inf Esq	YES	4	2 - Moderado (25-50%)	Vidro Fosco e Consolidação	#REF!	Aspecto Redondo	Pav Mosaico	Sinal do Halo Reverso	Espessamento Brônquico			Central e Periferico	Dois ou Mais Lobos	Bilateral	Lobo Sup Dir	Lobo Médio	Lobo Inf Dir	Lobo Sup Esq	Lobo Inf Esq	YES	YES	YES	YES	NO	NO	YES	YES
476	71-80	1	2020-03-02	POSITIVE FOR COVID	YES		1 - Leve (<25%)	Vidro Fosco e Consolidação		Pav Mosaico		Espessamento Brônquico			Central e Periferico	Dois ou Mais Lobos	Bilateral			Lobo Inf Dir		Lobo Inf Esq	Duvidosa		1 - Leve (<25%)	Vidro Fosco e Consolidação	#REF!		Pav Mosaico		Espessamento Brônquico			Central e Periferico	Dois ou Mais Lobos	Bilateral	Lobo Sup Dir	Lobo Médio	Lobo Inf Dir	Lobo Sup Esq	Lobo Inf Esq	YES	NO	YES	NO	NO	NO	YES	YES
477	71-80	1	2020-03-21	POSITIVE FOR COVID	NO		2 - Moderado (25-50%)	Vidro Fosco e Consolidação		Pav Mosaico		Espessamento Brônquico	Derrame Pleural		Central e Periferico	Dois ou Mais Lobos	Bilateral	Lobo Sup Dir	Lobo Médio	Lobo Inf Dir	Lobo Sup Esq	Lobo Inf Esq					#REF!								Unico Lobo	Unilateral						NO	YES	YES	NO	NO	NO	NO	NO
478	<50	1	2020-04-02	POSITIVE FOR COVID	NO	0	1 - Leve (<25%)	Vidro Fosco Pura	Aspecto Redondo						Periferico	Unico Lobo	Unilateral			Lobo Inf Dir				0			#REF!								Unico Lobo	Unilateral						NO	NO	YES	YES	NO	YES	NO	NO
479	>80	2	2020-03-21	POSITIVE FOR COVID	NO		Grave (>50%)	Vidro Fosco Pura		Pav Mosaico		Espessamento Brônquico			Central e Periferico	Dois ou Mais Lobos	Bilateral	Lobo Sup Dir	Lobo Médio	Lobo Inf Dir	Lobo Sup Esq	Lobo Inf Esq					#REF!								Unico Lobo	Unilateral						NO	NO	NO	YES	NO	NO	YES	YES
480	71-80	3	2020-03-08	POSITIVE FOR COVID	YES	3	1 - Leve (<25%)	Vidro Fosco e Consolidação		Pav Mosaico		Espessamento Brônquico	Derrame Pleural		Central e Periferico	Unico Lobo	Unilateral			Lobo Inf Dir		Lobo Inf Esq	Duvidosa	3	1 - Leve (<25%)	Vidro Fosco e Consolidação	#REF!		Pav Mosaico		Espessamento Brônquico			Central e Periferico	Dois ou Mais Lobos	Bilateral			Lobo Inf Dir		Lobo Inf Esq	YES	NO	NO	NO	NO	NO	YES	NO
481	71-80	2	2020-03-24	POSITIVE FOR COVID	NO		2 - Moderado (25-50%)	Vidro Fosco e Consolidação	Aspecto Redondo	Pav Mosaico		Espessamento Brônquico			Periferico	Dois ou Mais Lobos	Bilateral	Lobo Sup Dir	Lobo Médio	Lobo Inf Dir	Lobo Sup Esq	Lobo Inf Esq					#REF!								Unico Lobo	Unilateral						NO	NO	NO	NO	YES	NO	YES	YES
482	<50	2	2020-03-14	POSITIVE FOR COVID	NO	3	1 - Leve (<25%)	Vidro Fosco e Consolidação	Aspecto Redondo	Pav Mosaico	Sinal do Halo Reverso	Espessamento Brônquico			Periferico	Unico Lobo	Unilateral			Lobo Inf Dir	Lobo Sup Esq	Lobo Inf Esq	YES	3	1 - Leve (<25%)	Vidro Fosco e Consolidação	#REF!	Aspecto Redondo	Pav Mosaico	Sinal do Halo Reverso	Espessamento Brônquico			Periferico	Unico Lobo	Unilateral			Lobo Inf Dir	Lobo Sup Esq	Lobo Inf Esq	YES	YES	YES	NO	NO	NO	NO	NO
483	61-70	3	2020-03-10	POSITIVE FOR COVID	YES	1	2 - Moderado (25-50%)	Vidro Fosco Pura		Pav Mosaico		Espessamento Brônquico			Central e Periferico	Dois ou Mais Lobos	Bilateral	Lobo Sup Dir	Lobo Médio	Lobo Inf Dir	Lobo Sup Esq	Lobo Inf Esq	YES	1	2 - Moderado (25-50%)	Vidro Fosco e Consolidação	#REF!		Pav Mosaico		Espessamento Brônquico			Central e Periferico	Dois ou Mais Lobos	Bilateral	Lobo Sup Dir	Lobo Médio	Lobo Inf Dir	Lobo Sup Esq	Lobo Inf Esq	YES	NO	YES	NO	NO	NO	NO	YES
484	<50	1	2020-04-01	POSITIVE FOR COVID	NO	0	Não Se Aplica	Ausência de Opacidades				Espessamento Brônquico			Ausência de Opacidades									0			#REF!								Unico Lobo	Unilateral						NO	YES	NO	NO	NO	NO	NO	NO
485	>80	3	2020-03-15	POSITIVE FOR COVID	YES	6	2 - Moderado (25-50%)	Vidro Fosco e Consolidação		Pav Mosaico					Central e Periferico	Dois ou Mais Lobos	Bilateral	Lobo Sup Dir	Lobo Médio	Lobo Inf Dir	Lobo Sup Esq	Lobo Inf Esq	YES	6	2 - Moderado (25-50%)	Vidro Fosco e Consolidação	#REF!		Pav Mosaico					Central e Periferico	Dois ou Mais Lobos	Bilateral	Lobo Sup Dir	Lobo Médio	Lobo Inf Dir	Lobo Sup Esq	Lobo Inf Esq	YES	NO	NO	NO	NO	NO	NO	NO
486	>80	3	2020-03-15	POSITIVE FOR COVID	YES	4	1 - Leve (<25%)	Vidro Fosco Pura	Aspecto Redondo	Pav Mosaico	Sinal do Halo Reverso	Espessamento Brônquico			Periferico	Dois ou Mais Lobos	Bilateral	Lobo Sup Dir	Lobo Médio	Lobo Inf Dir	Lobo Sup Esq	Lobo Inf Esq	YES	4	1 - Leve (<25%)	Vidro Fosco Pura	#REF!	Aspecto Redondo	Pav Mosaico	Sinal do Halo Reverso	Espessamento Brônquico			Periferico	Dois ou Mais Lobos	Bilateral	Lobo Sup Dir	Lobo Médio	Lobo Inf Dir	Lobo Sup Esq	Lobo Inf Esq	YES	YES	NO	NO	NO	NO	NO	NO
487	71-80	2	2020-03-10	POSITIVE FOR COVID	YES	4	Grave (>50%)	Vidro Fosco e Consolidação		Pav Mosaico		Espessamento Brônquico	Derrame Pleural		Central e Periferico	Dois ou Mais Lobos	Bilateral	Lobo Sup Dir	Lobo Médio	Lobo Inf Dir	Lobo Sup Esq	Lobo Inf Esq	YES	4	Grave (>50%)	Vidro Fosco e Consolidação	#REF!		Pav Mosaico		Espessamento Brônquico	Derrame Pleural		Central e Periferico	Dois ou Mais Lobos	Bilateral	Lobo Sup Dir	Lobo Médio	Lobo Inf Dir	Lobo Sup Esq	Lobo Inf Esq	YES	NO	YES	NO	NO	NO	NO	NO
488	61-70	2	2020-04-05	POSITIVE FOR COVID	NO	1	2 - Moderado (25-50%)	Vidro Fosco e Consolidação	Aspecto Redondo	Pav Mosaico		Espessamento Brônquico			Central e Periferico	Dois ou Mais Lobos	Bilateral	Lobo Sup Dir	Lobo Médio	Lobo Inf Dir	Lobo Sup Esq	Lobo Inf Esq		1			#REF!								Unico Lobo	Unilateral						NO	NO	NO	YES	NO	NO	YES	NO
489	>80	2	2020-04-04	POSITIVE FOR COVID	NO		1 - Leve (<25%)	Vidro Fosco Pura		Pav Mosaico		Espessamento Brônquico			Periferico	Dois ou Mais Lobos	Bilateral	Lobo Sup Dir	Lobo Médio	Lobo Inf Dir	Lobo Sup Esq	Lobo Inf Esq					#REF!								Unico Lobo	Unilateral						NO	YES	NO	NO	NO	NO	NO	YES
490	61-70	2	2020-03-14	POSITIVE FOR COVID	NO		1 - Leve (<25%)	Vidro Fosco Pura	Aspecto Redondo	Pav Mosaico	Sinal do Halo Reverso				Central e Periferico	Dois ou Mais Lobos	Bilateral	Lobo Sup Dir	Lobo Médio	Lobo Inf Dir	Lobo Sup Esq	Lobo Inf Esq	YES		1 - Leve (<25%)	Vidro Fosco Pura	#REF!	Aspecto Redondo	Pav Mosaico	Sinal do Halo Reverso				Central e Periferico	Dois ou Mais Lobos	Bilateral	Lobo Sup Dir	Lobo Médio	Lobo Inf Dir	Lobo Sup Esq	Lobo Inf Esq	NO	YES	YES	NO	NO	NO	NO	NO
491	51-60	2	2020-03-12	POSITIVE FOR COVID	NO	1	2 - Moderado (25-50%)	Vidro Fosco e Consolidação	Aspecto Redondo	Pav Mosaico	Sinal do Halo Reverso	Espessamento Brônquico			Central e Periferico	Dois ou Mais Lobos	Bilateral	Lobo Sup Dir	Lobo Médio	Lobo Inf Dir	Lobo Sup Esq	Lobo Inf Esq	YES	1	2 - Moderado (25-50%)	Vidro Fosco e Consolidação	#REF!	Aspecto Redondo	Pav Mosaico	Sinal do Halo Reverso	Espessamento Brônquico			Central e Periferico	Dois ou Mais Lobos	Bilateral	Lobo Sup Dir	Lobo Médio	Lobo Inf Dir	Lobo Sup Esq	Lobo Inf Esq	YES	YES	YES	NO	NO	NO	NO	NO
492	71-80	2	2020-03-18	POSITIVE FOR COVID	NO	1	2 - Moderado (25-50%)	Vidro Fosco e Consolidação	Aspecto Redondo	Pav Mosaico	Sinal do Halo Reverso	Espessamento Brônquico			Central e Periferico	Dois ou Mais Lobos	Bilateral	Lobo Sup Dir	Lobo Médio	Lobo Inf Dir	Lobo Sup Esq	Lobo Sup Esq	YES	1	2 - Moderado (25-50%)	Vidro Fosco e Consolidação	#REF!	Aspecto Redondo	Pav Mosaico	Sinal do Halo Reverso	Espessamento Brônquico			Central e Periferico	Dois ou Mais Lobos	Bilateral	Lobo Sup Dir	Lobo Médio	Lobo Inf Dir	Lobo Sup Esq	Lobo Inf Esq	NO	YES	YES	NO	NO	YES	NO	NO
493	<50	1	2020-03-30	POSITIVE FOR COVID	NO	3	1 - Leve (<25%)	Vidro Fosco e Consolidação	Aspecto Redondo	Pav Mosaico		Espessamento Brônquico			Central e Periferico	Dois ou Mais Lobos	Bilateral	Lobo Sup Dir				Lobo Inf Esq		3			#REF!								Unico Lobo	Unilateral						NO	YES	YES	NO	YES	YES	NO	NO
494	51-60	2	2020-03-20	POSITIVE FOR COVID	YES	4	2 - Moderado (25-50%)	Vidro Fosco e Consolidação	Aspecto Redondo	Pav Mosaico	Sinal do Halo Reverso				Central e Periferico	Dois ou Mais Lobos	Bilateral	Lobo Sup Dir	Lobo Médio	Lobo Inf Dir	Lobo Sup Esq	Lobo Inf Esq		4			#REF!								Unico Lobo	Unilateral						YES	YES	YES	YES	YES	NO	NO	NO
495	71-80	2	2020-03-10	POSITIVE FOR COVID	NO	1	Grave (>50%)	Vidro Fosco e Consolidação	Aspecto Redondo	Pav Mosaico	Sinal do Halo Reverso	Espessamento Brônquico			Central e Periferico	Dois ou Mais Lobos	Bilateral	Lobo Sup Dir	Lobo Médio	Lobo Inf Dir	Lobo Sup Esq	Lobo Inf Esq	YES	1	Grave (>50%)	Vidro Fosco e Consolidação	#REF!	Aspecto Redondo	Pav Mosaico	Sinal do Halo Reverso	Espessamento Brônquico			Central e Periferico	Dois ou Mais Lobos	Bilateral	Lobo Sup Dir	Lobo Médio	Lobo Inf Dir	Lobo Sup Esq	Lobo Inf Esq	NO	NO	NO	YES	NO	NO	YES	YES
496	71-80	2	2020-03-17	POSITIVE FOR COVID	NO	1	2 - Moderado (25-50%)	Vidro Fosco Pura		Pav Mosaico	Sinal do Halo Reverso				Central e Periferico	Dois ou Mais Lobos	Bilateral	Lobo Sup Dir	Lobo Médio	Lobo Inf Dir	Lobo Sup Esq	Lobo Inf Esq	YES	1	2 - Moderado (25-50%)	Consolidação Pura	#REF!	Aspecto Redondo	Pav Mosaico	Sinal do Halo Reverso				Central e Periferico	Dois ou Mais Lobos	Bilateral	Lobo Sup Dir	Lobo Médio	Lobo Inf Dir	Lobo Sup Esq	Lobo Inf Esq	YES	YES	YES	NO	NO	NO	YES	NO
497	71-80	2	2020-03-29	POSITIVE FOR COVID	NO	1	1 - Leve (<25%)	Vidro Fosco Pura		Pav Mosaico	Sinal do Halo Reverso	Espessamento Brônquico			Periferico	Dois ou Mais Lobos	Bilateral		Lobo Médio	Lobo Inf Dir		Lobo Inf Esq		1			#REF!								Unico Lobo	Unilateral						NO	NO	YES	NO	NO	YES	YES	NO
498	71-80	3	2020-03-23	POSITIVE FOR COVID	YES		2 - Moderado (25-50%)	Vidro Fosco e Consolidação		Pav Mosaico		Espessamento Brônquico		LinfadeNOmegalia	Central e Periferico	Dois ou Mais Lobos	Bilateral	Lobo Sup Dir	Lobo Médio	Lobo Inf Dir	Lobo Sup Esq	Lobo Inf Esq					#REF!								Unico Lobo	Unilateral						YES	YES	YES	NO	NO	NO	NO	NO
499	>80	1	2020-03-02	POSITIVE FOR COVID	YES	0	1 - Leve (<25%)	Vidro Fosco e Consolidação	Aspecto Redondo	Pav Mosaico	Sinal do Halo Reverso	Espessamento Brônquico			Central e Periferico	Dois ou Mais Lobos	Bilateral			Lobo Inf Dir	Lobo Sup Esq	Lobo Inf Esq	YES	0	1 - Leve (<25%)	Vidro Fosco e Consolidação	#REF!	Aspecto Redondo	Pav Mosaico	Sinal do Halo Reverso	Espessamento Brônquico			Central e Periferico	Dois ou Mais Lobos	Bilateral			Lobo Inf Dir	Lobo Sup Esq	Lobo Inf Esq	NO	NO	YES	NO	NO	NO	NO	YES
500	>80	1	2020-03-29	POSITIVE FOR COVID	NO	0	1 - Leve (<25%)	Vidro Fosco Pura		Pav Mosaico		Espessamento Brônquico			Periferico	Dois ou Mais Lobos	Bilateral	Lobo Sup Dir	Lobo Médio	Lobo Inf Dir	Lobo Sup Esq	Lobo Inf Esq		0			#REF!								Unico Lobo	Unilateral						YES	NO	NO	NO	NO	NO	NO	NO
501	71-80	2	2020-03-29	POSITIVE FOR COVID	NO	1	Grave (>50%)	Vidro Fosco e Consolidação		Pav Mosaico		Espessamento Brônquico	Derrame Pleural		Central e Periferico	Dois ou Mais Lobos	Bilateral	Lobo Sup Dir	Lobo Médio	Lobo Inf Dir	Lobo Sup Esq	Lobo Inf Esq		1			#REF!								Unico Lobo	Unilateral						YES	NO	NO	NO	NO	NO	NO	NO
502	61-70	1	2020-03-15	POSITIVE FOR COVID	NO	0	1 - Leve (<25%)	Vidro Fosco e Consolidação	Aspecto Redondo	Pav Mosaico		Espessamento Brônquico			Central e Periferico	Dois ou Mais Lobos	Bilateral	Lobo Sup Dir	Lobo Médio	Lobo Inf Dir	Lobo Sup Esq	Lobo Inf Esq	YES	0	2 - Moderado (25-50%)	Vidro Fosco e Consolidação	#REF!	Aspecto Redondo	Pav Mosaico		Espessamento Brônquico			Central e Periferico	Dois ou Mais Lobos	Bilateral	Lobo Sup Dir	Lobo Médio	Lobo Inf Dir	Lobo Sup Esq	Lobo Inf Esq	NO	YES	YES	YES	YES	NO	NO	NO
503	71-80	2	2020-03-26	POSITIVE FOR COVID	YES	1	2 - Moderado (25-50%)	Vidro Fosco e Consolidação	Aspecto Redondo	Pav Mosaico		Espessamento Brônquico			Central e Periferico	Dois ou Mais Lobos	Bilateral	Lobo Sup Dir	Lobo Médio	Lobo Inf Dir	Lobo Sup Esq	Lobo Inf Esq		1			#REF!								Unico Lobo	Unilateral						YES	NO	YES	NO	NO	NO	NO	NO
504	71-80	2	2020-03-10	POSITIVE FOR COVID	YES	1	1 - Leve (<25%)	Vidro Fosco Pura		Pav Mosaico	Sinal do Halo Reverso				Central e Periferico	Dois ou Mais Lobos	Bilateral	Lobo Sup Dir	Lobo Médio	Lobo Inf Dir	Lobo Sup Esq	Lobo Inf Esq	YES	1	1 - Leve (<25%)	Vidro Fosco Pura	#REF!		Pav Mosaico	Sinal do Halo Reverso				Central e Periferico	Dois ou Mais Lobos	Bilateral	Lobo Sup Dir		Lobo Inf Dir	Lobo Sup Esq	Lobo Inf Esq	YES	YES	YES	NO	NO	NO	NO	NO
505	71-80	2	2020-03-14	POSITIVE FOR COVID	YES	4	2 - Moderado (25-50%)	Vidro Fosco e Consolidação	Aspecto Redondo	Pav Mosaico		Espessamento Brônquico	Derrame Pleural		Central e Periferico	Dois ou Mais Lobos	Bilateral	Lobo Sup Dir	Lobo Médio	Lobo Inf Dir	Lobo Sup Esq	Lobo Inf Esq	YES	4	2 - Moderado (25-50%)	Vidro Fosco e Consolidação	#REF!	Aspecto Redondo	Pav Mosaico		Espessamento Brônquico	Derrame Pleural		Central e Periferico	Dois ou Mais Lobos	Bilateral	Lobo Sup Dir	Lobo Médio	Lobo Inf Dir	Lobo Sup Esq	Lobo Inf Esq	YES	YES	NO	YES	NO	NO	NO	NO
506	>80	2	2020-03-05	POSITIVE FOR COVID	YES	3	1 - Leve (<25%)	Vidro Fosco Pura		Pav Mosaico		Espessamento Brônquico	Derrame Pleural		Central e Periferico	Dois ou Mais Lobos	Bilateral	Lobo Sup Dir				Lobo Inf Esq	Duvidosa	3	2 - Moderado (25-50%)	Vidro Fosco e Consolidação	#REF!		Pav Mosaico		Espessamento Brônquico	Derrame Pleural		Central e Periferico	Dois ou Mais Lobos	Bilateral	Lobo Sup Dir	Lobo Médio	Lobo Inf Dir	Lobo Sup Esq	Lobo Inf Esq	YES	YES	YES	NO	NO	NO	YES	NO
507	61-70	2	2020-03-26	POSITIVE FOR COVID	NO	0	1 - Leve (<25%)	Vidro Fosco Pura	Aspecto Redondo	Pav Mosaico		Espessamento Brônquico			Periferico	Dois ou Mais Lobos	Bilateral	Lobo Sup Dir		Lobo Inf Dir	Lobo Sup Esq			0			#REF!								Unico Lobo	Unilateral						NO	YES	YES	NO	NO	NO	NO	NO
508	71-80	1	2020-03-26	POSITIVE FOR COVID	NO	0	2 - Moderado (25-50%)	Vidro Fosco Pura		Pav Mosaico		Espessamento Brônquico			Periferico	Dois ou Mais Lobos	Bilateral	Lobo Sup Dir	Lobo Médio	Lobo Inf Dir	Lobo Sup Esq	Lobo Inf Esq		0			#REF!								Unico Lobo	Unilateral						NO	YES	NO	YES	NO	NO	NO	NO
509	71-80	2	2020-03-23	POSITIVE FOR COVID	NO		2 - Moderado (25-50%)	Vidro Fosco Pura	Aspecto Redondo	Pav Mosaico		Espessamento Brônquico			Periferico	Dois ou Mais Lobos	Bilateral	Lobo Sup Dir	Lobo Médio	Lobo Inf Dir	Lobo Sup Esq	Lobo Inf Esq					#REF!								Unico Lobo	Unilateral						NO	YES	YES	NO	NO	NO	NO	YES
510	61-70	2	2020-03-17	POSITIVE FOR COVID	NO		2 - Moderado (25-50%)	Vidro Fosco e Consolidação	Aspecto Redondo	Pav Mosaico	Sinal do Halo Reverso	Espessamento Brônquico			Central e Periferico	Dois ou Mais Lobos	Bilateral	Lobo Sup Dir	Lobo Médio	Lobo Inf Dir	Lobo Sup Esq	Lobo Inf Esq					#REF!								Unico Lobo	Unilateral						YES	YES	YES	YES	NO	NO	NO	NO
511	71-80	3	2020-03-23	POSITIVE FOR COVID	YES		Grave (>50%)	Vidro Fosco e Consolidação	Aspecto Redondo	Pav Mosaico		Espessamento Brônquico			Central e Periferico	Dois ou Mais Lobos	Bilateral	Lobo Sup Dir	Lobo Médio	Lobo Inf Dir	Lobo Sup Esq	Lobo Inf Esq					#REF!								Unico Lobo	Unilateral						YES	YES	YES	NO	NO	NO	NO	NO
512	61-70	1	2020-04-01	POSITIVE FOR COVID	NO	0	2 - Moderado (25-50%)	Vidro Fosco Pura	Aspecto Redondo	Pav Mosaico		Espessamento Brônquico			Central e Periferico	Dois ou Mais Lobos	Bilateral	Lobo Sup Dir	Lobo Médio	Lobo Inf Dir	Lobo Sup Esq	Lobo Inf Esq		0			#REF!								Unico Lobo	Unilateral						YES	YES	YES	NO	NO	NO	NO	NO
513	71-80	2	2020-03-23	POSITIVE FOR COVID	YES		Grave (>50%)	Vidro Fosco e Consolidação	Aspecto Redondo	Pav Mosaico		Espessamento Brônquico			Central e Periferico	Dois ou Mais Lobos	Bilateral	Lobo Sup Dir	Lobo Médio	Lobo Inf Dir	Lobo Sup Esq	Lobo Inf Esq					#REF!								Unico Lobo	Unilateral						NO	NO	NO	NO	NO	NO	YES	YES
514	71-80	2	2020-03-18	POSITIVE FOR COVID	YES		Grave (>50%)	Vidro Fosco e Consolidação	Aspecto Redondo	Pav Mosaico	Sinal do Halo Reverso	Espessamento Brônquico			Central e Periferico	Dois ou Mais Lobos	Bilateral	Lobo Sup Dir	Lobo Médio	Lobo Inf Dir	Lobo Sup Esq	Lobo Inf Esq	YES		Grave (>50%)	Vidro Fosco e Consolidação	#REF!	Aspecto Redondo	Pav Mosaico		Espessamento Brônquico			Central e Periferico	Dois ou Mais Lobos	Bilateral	Lobo Sup Dir	Lobo Médio	Lobo Inf Dir	Lobo Sup Esq	Lobo Inf Esq	NO	NO	NO	YES	NO	NO	YES	YES
515	71-80	3	2020-03-13	POSITIVE FOR COVID	YES	1	Grave (>50%)	Vidro Fosco e Consolidação	Aspecto Redondo	Pav Mosaico	Sinal do Halo Reverso	Espessamento Brônquico			Central e Periferico	Dois ou Mais Lobos	Bilateral	Lobo Sup Dir	Lobo Médio	Lobo Inf Dir	Lobo Sup Esq	Lobo Inf Esq	YES	1	Grave (>50%)	Vidro Fosco e Consolidação	#REF!	Aspecto Redondo	Pav Mosaico	Sinal do Halo Reverso	Espessamento Brônquico			Central e Periferico	Dois ou Mais Lobos	Bilateral	Lobo Sup Dir	Lobo Médio	Lobo Inf Dir	Lobo Sup Esq	Lobo Inf Esq	YES	YES	YES	NO	NO	NO	NO	NO
516	>80	2	2020-03-28	POSITIVE FOR COVID	NO	0	1 - Leve (<25%)	Vidro Fosco e Consolidação		Pav Mosaico		Espessamento Brônquico			Periferico	Unico Lobo	Unilateral			Lobo Inf Dir				0			#REF!								Unico Lobo	Unilateral						NO	NO	YES	YES	NO	NO	NO	NO
517	<50	1	2020-03-13	POSITIVE FOR COVID	NO	0	2 - Moderado (25-50%)	Vidro Fosco Pura	Aspecto Redondo						Periferico	Unico Lobo	Unilateral				Lobo Sup Esq		YES	0	1 - Leve (<25%)	Vidro Fosco Pura	#REF!	Aspecto Redondo						Periferico	Unico Lobo	Unilateral				Lobo Sup Esq		YES	NO	YES	YES	YES	NO	NO	NO
518	71-80	2	2020-03-24	POSITIVE FOR COVID	YES		2 - Moderado (25-50%)	Vidro Fosco e Consolidação	Aspecto Redondo	Pav Mosaico	Sinal do Halo Reverso	Espessamento Brônquico			Central e Periferico	Dois ou Mais Lobos	Bilateral	Lobo Sup Dir	Lobo Médio	Lobo Inf Dir	Lobo Sup Esq	Lobo Inf Esq					#REF!								Unico Lobo	Unilateral						YES	NO	YES	NO	NO	NO	YES	NO
519	61-70	3	2020-03-23	POSITIVE FOR COVID	NO	1	Grave (>50%)	Vidro Fosco e Consolidação		Pav Mosaico		Espessamento Brônquico			Central e Periferico	Dois ou Mais Lobos	Bilateral	Lobo Sup Dir	Lobo Médio	Lobo Inf Dir	Lobo Sup Esq	Lobo Inf Esq		1			#REF!								Unico Lobo	Unilateral						NO	YES	YES	NO	NO	NO	NO	NO
520	71-80	2	2020-03-19	POSITIVE FOR COVID	NO		2 - Moderado (25-50%)	Vidro Fosco e Consolidação	Aspecto Redondo	Pav Mosaico	Sinal do Halo Reverso	Espessamento Brônquico			Central e Periferico	Dois ou Mais Lobos	Bilateral	Lobo Sup Dir	Lobo Médio	Lobo Inf Dir	Lobo Sup Esq	Lobo Inf Esq					#REF!								Unico Lobo	Unilateral						NO	YES	YES	NO	YES	YES	YES	YES
521	71-80	2	2020-03-30	POSITIVE FOR COVID	NO		1 - Leve (<25%)	Vidro Fosco Pura		Pav Mosaico		Espessamento Brônquico			Central e Periferico	Dois ou Mais Lobos	Bilateral	Lobo Sup Dir	Lobo Médio	Lobo Inf Dir	Lobo Sup Esq	Lobo Inf Esq					#REF!								Unico Lobo	Unilateral						NO	YES	YES	NO	NO	NO	NO	NO
522	51-60	1	2020-03-30	POSITIVE FOR COVID	NO	3	1 - Leve (<25%)	Vidro Fosco e Consolidação	Aspecto Redondo	Pav Mosaico	Sinal do Halo Reverso	Espessamento Brônquico			Periferico	Dois ou Mais Lobos	Unilateral		Lobo Médio	Lobo Inf Dir				3			#REF!								Unico Lobo	Unilateral						NO	YES	NO	NO	NO	NO	NO	NO
523	>80	1	2020-03-08	POSITIVE FOR COVID	YES	4	1 - Leve (<25%)	Vidro Fosco Pura	Aspecto Redondo	Pav Mosaico		Espessamento Brônquico			Central e Periferico	Dois ou Mais Lobos	Bilateral	Lobo Sup Dir	Lobo Médio	Lobo Inf Dir	Lobo Sup Esq	Lobo Inf Esq	YES	4	1 - Leve (<25%)	Vidro Fosco Pura	#REF!	Aspecto Redondo	Pav Mosaico		Espessamento Brônquico			Central e Periferico	Dois ou Mais Lobos	Bilateral	Lobo Sup Dir	Lobo Médio	Lobo Inf Dir	Lobo Sup Esq	Lobo Inf Esq	YES	YES	YES	NO	NO	NO	NO	YES
524	71-80	2	2020-03-17	POSITIVE FOR COVID	NO	6	2 - Moderado (25-50%)	Vidro Fosco e Consolidação		Pav Mosaico		Espessamento Brônquico			Central e Periferico	Dois ou Mais Lobos	Bilateral	Lobo Sup Dir	Lobo Médio	Lobo Inf Dir	Lobo Sup Esq	Lobo Inf Esq	YES	6	2 - Moderado (25-50%)	Vidro Fosco e Consolidação	#REF!		Pav Mosaico		Espessamento Brônquico			Central e Periferico	Dois ou Mais Lobos	Bilateral	Lobo Sup Dir	Lobo Médio	Lobo Inf Dir	Lobo Sup Esq	Lobo Inf Esq	YES	YES	YES	NO	YES	NO	NO	NO
525	61-70	2	2020-03-20	POSITIVE FOR COVID	NO	4	1 - Leve (<25%)	Vidro Fosco Pura	Aspecto Redondo	Pav Mosaico	Sinal do Halo Reverso	Espessamento Brônquico			Periferico	Dois ou Mais Lobos	Bilateral	Lobo Sup Dir		Lobo Inf Dir	Lobo Sup Esq	Lobo Inf Esq	YES	4	1 - Leve (<25%)	Vidro Fosco Pura	#REF!	Aspecto Redondo	Pav Mosaico	Sinal do Halo Reverso				Periferico	Dois ou Mais Lobos	Bilateral	Lobo Sup Dir		Lobo Inf Dir	Lobo Sup Esq	Lobo Inf Esq	YES	YES	YES	NO	NO	NO	NO	NO
526	>80	1	2020-03-23	POSITIVE FOR COVID	YES	0	1 - Leve (<25%)	Vidro Fosco e Consolidação		Pav Mosaico		Espessamento Brônquico	Derrame Pleural		Central e Periferico	Dois ou Mais Lobos	Bilateral			Lobo Inf Dir		Lobo Inf Esq		0			#REF!								Unico Lobo	Unilateral						YES	YES	YES	NO	NO	NO	NO	NO
527	71-80	2	2020-04-03	POSITIVE FOR COVID	NO	4	Grave (>50%)	Vidro Fosco e Consolidação		Pav Mosaico	Sinal do Halo Reverso	Espessamento Brônquico			Central e Periferico	Dois ou Mais Lobos	Bilateral	Lobo Sup Dir	Lobo Médio	Lobo Inf Dir	Lobo Sup Esq	Lobo Inf Esq		4			#REF!								Unico Lobo	Unilateral						YES	NO	YES	NO	NO	NO	NO	NO
528	51-60	1	2020-03-26	POSITIVE FOR COVID	NO	0	1 - Leve (<25%)	Vidro Fosco Pura	Aspecto Redondo	Pav Mosaico	Sinal do Halo Reverso				Periferico	Dois ou Mais Lobos	Bilateral	Lobo Sup Dir	Lobo Médio	Lobo Inf Dir	Lobo Sup Esq	Lobo Inf Esq		0			#REF!								Unico Lobo	Unilateral						YES	YES	YES	YES	NO	NO	NO	NO
529	<50	2	2020-03-14	POSITIVE FOR COVID	NO		Não Se Aplica	Ausência de Opacidades				Espessamento Brônquico			Ausência de Opacidades								Não		Não Se Aplica	Ausência de Opacidades	#REF!				Espessamento Brônquico			Ausência de Opacidades								YES	YES	YES	NO	YES	YES	NO	NO
530	71-80	3	2020-03-25	POSITIVE FOR COVID	YES	4	Grave (>50%)	Vidro Fosco e Consolidação		Pav Mosaico		Espessamento Brônquico	Derrame Pleural		Central e Periferico	Dois ou Mais Lobos	Bilateral	Lobo Sup Dir	Lobo Médio	Lobo Inf Dir	Lobo Sup Esq	Lobo Inf Esq		4			#REF!								Unico Lobo	Unilateral						YES	YES	YES	NO	NO	NO	NO	NO
531	<50	1	2020-03-27	POSITIVE FOR COVID	NO	0	1 - Leve (<25%)	Vidro Fosco Pura	Aspecto Redondo	Pav Mosaico					Periferico	Dois ou Mais Lobos	Bilateral	Lobo Sup Dir	Lobo Médio	Lobo Inf Dir	Lobo Sup Esq	Lobo Inf Esq		0			#REF!								Unico Lobo	Unilateral						YES	YES	YES	NO	NO	NO	NO	NO
532	51-60	2	2020-03-19	POSITIVE FOR COVID	NO	0	1 - Leve (<25%)	Vidro Fosco e Consolidação	Aspecto Redondo	Pav Mosaico		Espessamento Brônquico			Central e Periferico	Dois ou Mais Lobos	Bilateral	Lobo Sup Dir	Lobo Médio	Lobo Inf Dir	Lobo Sup Esq	Lobo Inf Esq		0			#REF!								Unico Lobo	Unilateral						YES	YES	YES	NO	NO	NO	NO	NO
533	<50	1	2020-03-24	POSITIVE FOR COVID	NO	0	1 - Leve (<25%)	Vidro Fosco Pura	Aspecto Redondo	Pav Mosaico		Espessamento Brônquico			Periferico	Unico Lobo	Unilateral			Lobo Inf Dir			YES	0	1 - Leve (<25%)	Vidro Fosco Pura	#REF!	Aspecto Redondo	Pav Mosaico		Espessamento Brônquico			Periferico	Unico Lobo	Unilateral			Lobo Inf Dir			NO	NO	YES	NO	YES	NO	NO	NO
534	<50	1	2020-03-24	POSITIVE FOR COVID	NO	0	1 - Leve (<25%)	Vidro Fosco Pura	Aspecto Redondo	Pav Mosaico					Periferico	Dois ou Mais Lobos	Bilateral	Lobo Sup Dir		Lobo Inf Dir	Lobo Sup Esq	Lobo Inf Esq		0			#REF!								Unico Lobo	Unilateral						NO	NO	YES	NO	NO	YES	NO	NO
535	51-60	2	2020-03-24	POSITIVE FOR COVID	NO	1	1 - Leve (<25%)	Vidro Fosco Pura	Aspecto Redondo	Pav Mosaico					Periferico	Dois ou Mais Lobos	Unilateral		Lobo Médio	Lobo Inf Dir				1			#REF!								Unico Lobo	Unilateral						YES	YES	NO	YES	NO	NO	NO	NO
536	61-70	3	2020-03-27	POSITIVE FOR COVID	NO	1	2 - Moderado (25-50%)	Vidro Fosco e Consolidação	Aspecto Redondo	Pav Mosaico		Espessamento Brônquico			Central e Periferico	Dois ou Mais Lobos	Bilateral	Lobo Sup Dir	Lobo Médio	Lobo Inf Dir	Lobo Sup Esq	Lobo Inf Esq		1			#REF!								Unico Lobo	Unilateral						YES	NO	YES	NO	NO	NO	NO	YES
537	>80	2	2020-03-24	POSITIVE FOR COVID	YES	3	Grave (>50%)	Vidro Fosco Pura	Aspecto Redondo	Pav Mosaico	Sinal do Halo Reverso				Central e Periferico	Dois ou Mais Lobos	Bilateral	Lobo Sup Dir	Lobo Médio	Lobo Inf Dir	Lobo Sup Esq	Lobo Inf Esq		3			#REF!								Unico Lobo	Unilateral						NO	NO	NO	NO	NO	NO	NO	NO
538	71-80	2	2020-03-12	POSITIVE FOR COVID	NO	4	2 - Moderado (25-50%)	Vidro Fosco e Consolidação	Aspecto Redondo	Pav Mosaico					Central e Periferico	Dois ou Mais Lobos	Bilateral	Lobo Sup Dir	Lobo Médio	Lobo Inf Dir	Lobo Sup Esq	Lobo Inf Esq	YES	4	2 - Moderado (25-50%)	Vidro Fosco e Consolidação	#REF!	Aspecto Redondo	Pav Mosaico					Central e Periferico	Dois ou Mais Lobos	Bilateral	Lobo Sup Dir	Lobo Médio	Lobo Inf Dir	Lobo Sup Esq	Lobo Inf Esq	YES	YES	YES	YES	NO	NO	NO	YES
539	<50	1	2020-03-21	POSITIVE FOR COVID	NO	0	NOrmal	Ausência de Opacidades							Ausência de Opacidades									0			#REF!								Unico Lobo	Unilateral						NO	YES	NO	NO	YES	NO	NO	NO
540	61-70	2	2020-03-24	POSITIVE FOR COVID	NO	5	1 - Leve (<25%)	Vidro Fosco e Consolidação	Aspecto Redondo	Pav Mosaico	Sinal do Halo Reverso	Espessamento Brônquico			Periferico	Dois ou Mais Lobos	Bilateral	Lobo Sup Dir	Lobo Médio	Lobo Inf Dir	Lobo Sup Esq	Lobo Inf Esq		5			#REF!								Unico Lobo	Unilateral						YES	YES	NO	NO	NO	NO	YES	NO
541	>80	3	2020-03-13	POSITIVE FOR COVID	YES	5	2 - Moderado (25-50%)	Vidro Fosco e Consolidação		Pav Mosaico	Sinal do Halo Reverso	Espessamento Brônquico			Central e Periferico	Dois ou Mais Lobos	Bilateral	Lobo Sup Dir	Lobo Médio	Lobo Inf Dir	Lobo Sup Esq	Lobo Inf Esq	YES	5	2 - Moderado (25-50%)	Vidro Fosco e Consolidação	#REF!		Pav Mosaico	Sinal do Halo Reverso	Espessamento Brônquico			Central e Periferico	Dois ou Mais Lobos	Bilateral	Lobo Sup Dir	Lobo Médio	Lobo Inf Dir	Lobo Sup Esq	Lobo Inf Esq	YES	NO	YES	NO	NO	NO	NO	YES
542	<50	1	2020-03-25	POSITIVE FOR COVID	NO		1 - Leve (<25%)	Vidro Fosco e Consolidação	Aspecto Redondo						Periferico	Unico Lobo	Unilateral			Lobo Inf Dir							#REF!								Unico Lobo	Unilateral						NO	NO	NO	NO	NO	NO	NO	NO
543	>80	2	2020-03-28	POSITIVE FOR COVID	YES		1 - Leve (<25%)	Vidro Fosco e Consolidação		Pav Mosaico					Periferico	Dois ou Mais Lobos	Bilateral		Lobo Médio	Lobo Inf Dir		Lobo Inf Esq					#REF!								Unico Lobo	Unilateral						YES	NO	NO	NO	NO	NO	NO	NO
544	71-80	3	2020-03-25	POSITIVE FOR COVID	NO	1	2 - Moderado (25-50%)	Vidro Fosco e Consolidação	Aspecto Redondo	Pav Mosaico		Espessamento Brônquico			Central e Periferico	Dois ou Mais Lobos	Bilateral	Lobo Sup Dir	Lobo Médio	Lobo Inf Dir	Lobo Sup Esq	Lobo Inf Esq		1			#REF!								Unico Lobo	Unilateral						YES	NO	YES	NO	NO	NO	NO	NO
545	61-70	1	2020-03-12	POSITIVE FOR COVID	NO	1	1 - Leve (<25%)	Vidro Fosco e Consolidação		Pav Mosaico	Sinal do Halo Reverso				Periferico	Dois ou Mais Lobos	Bilateral	Lobo Sup Dir	Lobo Médio	Lobo Inf Dir	Lobo Sup Esq	Lobo Inf Esq	YES	1	1 - Leve (<25%)	Vidro Fosco e Consolidação	#REF!		Pav Mosaico	Sinal do Halo Reverso				Periferico	Dois ou Mais Lobos	Bilateral	Lobo Sup Dir	Lobo Médio	Lobo Inf Dir	Lobo Sup Esq	Lobo Inf Esq	NO	YES	YES	YES	NO	NO	NO	NO
546	<50	1	2020-03-19	POSITIVE FOR COVID	NO	0	1 - Leve (<25%)	Vidro Fosco Pura	Aspecto Redondo						Periferico	Dois ou Mais Lobos	Bilateral	Lobo Sup Dir		Lobo Inf Dir		Lobo Inf Esq	YES	0	1 - Leve (<25%)	Vidro Fosco Pura	#REF!	Aspecto Redondo						Periferico	Dois ou Mais Lobos	Bilateral	Lobo Sup Dir		Lobo Inf Dir		Lobo Inf Esq	YES	NO	NO	NO	NO	NO	NO	NO
547	<50	2	2020-03-23	POSITIVE FOR COVID	NO	4	1 - Leve (<25%)	Vidro Fosco e Consolidação	Aspecto Redondo	Pav Mosaico	Sinal do Halo Reverso	Espessamento Brônquico			Central e Periferico	Dois ou Mais Lobos	Bilateral	Lobo Sup Dir	Lobo Médio	Lobo Inf Dir	Lobo Sup Esq	Lobo Inf Esq		4			#REF!								Unico Lobo	Unilateral						YES	YES	YES	YES	NO	NO	NO	YES
548	>80	1	2020-03-07	POSITIVE FOR COVID	NO	0	1 - Leve (<25%)	Vidro Fosco Pura	Aspecto Redondo	Pav Mosaico					Periferico	Dois ou Mais Lobos	Bilateral	Lobo Sup Dir	Lobo Médio	Lobo Inf Dir	Lobo Sup Esq	Lobo Inf Esq	YES	0	1 - Leve (<25%)	Vidro Fosco Pura	#REF!	Aspecto Redondo	Pav Mosaico					Periferico	Dois ou Mais Lobos	Bilateral	Lobo Sup Dir	Lobo Médio	Lobo Inf Dir	Lobo Sup Esq	Lobo Inf Esq	NO	NO	YES	YES	NO	YES	NO	NO
549	<50	2	2020-03-09	POSITIVE FOR COVID	NO	0	1 - Leve (<25%)	Vidro Fosco e Consolidação	Aspecto Redondo	Pav Mosaico	Sinal do Halo Reverso				Central e Periferico	Dois ou Mais Lobos	Bilateral	Lobo Sup Dir	Lobo Médio	Lobo Inf Dir	Lobo Sup Esq	Lobo Inf Esq	YES	0	2 - Moderado (25-50%)	Vidro Fosco Pura	#REF!	Aspecto Redondo	Pav Mosaico	Sinal do Halo Reverso				Central e Periferico	Dois ou Mais Lobos	Bilateral	Lobo Sup Dir	Lobo Médio	Lobo Inf Dir	Lobo Sup Esq	Lobo Inf Esq	NO	NO	YES	YES	NO	NO	NO	NO
550	71-80	3	2020-03-19	POSITIVE FOR COVID	YES	5	Grave (>50%)	Vidro Fosco Pura		Pav Mosaico					Central e Periferico	Dois ou Mais Lobos	Bilateral	Lobo Sup Dir	Lobo Médio	Lobo Inf Dir	Lobo Sup Esq	Lobo Inf Esq	YES	5	Grave (>50%)	Vidro Fosco Pura	#REF!		Pav Mosaico					Central e Periferico	Dois ou Mais Lobos	Bilateral	Lobo Sup Dir	Lobo Médio	Lobo Inf Dir	Lobo Sup Esq	Lobo Inf Esq	YES	NO	YES	NO	NO	NO	NO	NO
551	<50	1	2020-03-28	POSITIVE FOR COVID	NO	0	1 - Leve (<25%)	Vidro Fosco Pura	Aspecto Redondo	Pav Mosaico		Espessamento Brônquico			Central e Periferico	Dois ou Mais Lobos	Bilateral	Lobo Sup Dir		Lobo Inf Dir	Lobo Sup Esq	Lobo Inf Esq		0			#REF!								Unico Lobo	Unilateral						NO	YES	NO	YES	NO	NO	NO	NO
552	71-80	2	2020-03-04	POSITIVE FOR COVID	YES	1	Grave (>50%)	Vidro Fosco Pura		Pav Mosaico					Central e Periferico	Dois ou Mais Lobos	Bilateral	Lobo Sup Dir	Lobo Médio	Lobo Inf Dir	Lobo Sup Esq	Lobo Inf Esq		1			#REF!								Unico Lobo	Unilateral						NO	YES	NO	NO	NO	NO	YES	NO
553	61-70	3	2020-03-13	POSITIVE FOR COVID	YES	4	Grave (>50%)	Vidro Fosco Pura		Pav Mosaico					Central e Periferico	Dois ou Mais Lobos	Bilateral	Lobo Sup Dir	Lobo Médio	Lobo Inf Dir	Lobo Sup Esq	Lobo Inf Esq	YES	4	Grave (>50%)	Vidro Fosco Pura	#REF!		Pav Mosaico		Espessamento Brônquico			Central e Periferico	Dois ou Mais Lobos	Bilateral	Lobo Sup Dir	Lobo Médio	Lobo Inf Dir	Lobo Sup Esq	Lobo Inf Esq	YES	NO	NO	NO	NO	NO	YES	NO
554	<50	2	2020-03-31	POSITIVE FOR COVID	NO		Não Se Aplica	Ausência de Opacidades				Espessamento Brônquico			Ausência de Opacidades												#REF!								Unico Lobo	Unilateral						YES	YES	NO	NO	NO	NO	NO	NO
555	<50	1	2020-03-28	POSITIVE FOR COVID	NO		1 - Leve (<25%)	Vidro Fosco Pura	Aspecto Redondo			Espessamento Brônquico			Central e Periferico	Dois ou Mais Lobos	Bilateral	Lobo Sup Dir	Lobo Médio	Lobo Inf Dir	Lobo Sup Esq	Lobo Inf Esq					#REF!								Unico Lobo	Unilateral						YES	YES	NO	NO	NO	NO	NO	YES
556	>80	2	2020-03-27	POSITIVE FOR COVID	YES		2 - Moderado (25-50%)	Vidro Fosco e Consolidação	Aspecto Redondo	Pav Mosaico		Espessamento Brônquico			Central e Periferico	Dois ou Mais Lobos	Bilateral	Lobo Sup Dir	Lobo Médio	Lobo Inf Dir	Lobo Sup Esq	Lobo Inf Esq					#REF!								Unico Lobo	Unilateral						YES	YES	YES	NO	NO	NO	NO	NO
557	>80	3	2020-03-15	POSITIVE FOR COVID	YES		Grave (>50%)	Vidro Fosco e Consolidação		Pav Mosaico	Sinal do Halo Reverso	Espessamento Brônquico			Central e Periferico	Dois ou Mais Lobos	Bilateral	Lobo Sup Dir	Lobo Médio	Lobo Inf Dir	Lobo Sup Esq	Lobo Inf Esq	YES		Grave (>50%)	Vidro Fosco e Consolidação	#REF!		Pav Mosaico		Espessamento Brônquico			Central e Periferico	Dois ou Mais Lobos	Bilateral	Lobo Sup Dir	Lobo Médio	Lobo Inf Dir	Lobo Sup Esq	Lobo Inf Esq	YES	YES	YES	NO	NO	NO	NO	NO
558	<50	1	2020-03-27	POSITIVE FOR COVID	NO		2 - Moderado (25-50%)	Vidro Fosco e Consolidação		Pav Mosaico		Espessamento Brônquico			Central e Periferico	Dois ou Mais Lobos	Bilateral			Lobo Inf Dir	Lobo Sup Esq	Lobo Inf Esq					#REF!								Unico Lobo	Unilateral						YES	YES	YES	NO	NO	NO	NO	NO
559	71-80	2	2020-03-17	POSITIVE FOR COVID	NO		Não Se Aplica	Ausência de Opacidades				Espessamento Brônquico			Ausência de Opacidades								Não		Não Se Aplica	Ausência de Opacidades	#REF!				Espessamento Brônquico			Ausência de Opacidades								NO	YES	YES	NO	NO	NO	NO	NO
560	61-70	1	2020-03-28	POSITIVE FOR COVID	NO	4	1 - Leve (<25%)	Vidro Fosco e Consolidação		Pav Mosaico		Espessamento Brônquico	Derrame Pleural		Central e Periferico	Unico Lobo	Unilateral			Lobo Inf Dir				4			#REF!								Unico Lobo	Unilateral						NO	YES	YES	YES	YES	NO	YES	YES
561	61-70	2	2020-03-23	POSITIVE FOR COVID	NO	0	1 - Leve (<25%)	Vidro Fosco Pura		Pav Mosaico					Periferico	Dois ou Mais Lobos	Bilateral	Lobo Sup Dir	Lobo Médio	Lobo Inf Dir	Lobo Sup Esq	Lobo Inf Esq		0			#REF!								Unico Lobo	Unilateral						YES	YES	YES	NO	NO	NO	NO	YES
562	61-70	1	2020-03-19	POSITIVE FOR COVID	NO		2 - Moderado (25-50%)	Vidro Fosco e Consolidação	Aspecto Redondo	Pav Mosaico		Espessamento Brônquico			Central e Periferico	Dois ou Mais Lobos	Bilateral	Lobo Sup Dir	Lobo Médio	Lobo Inf Dir	Lobo Sup Esq	Lobo Inf Esq					#REF!								Unico Lobo	Unilateral						NO	YES	YES	NO	NO	NO	NO	NO
563	51-60	3	2020-03-20	POSITIVE FOR COVID	NO		Grave (>50%)	Vidro Fosco Pura	Aspecto Redondo	Pav Mosaico					Central e Periferico	Dois ou Mais Lobos	Bilateral	Lobo Sup Dir	Lobo Médio	Lobo Inf Dir	Lobo Sup Esq	Lobo Inf Esq					#REF!								Unico Lobo	Unilateral						YES	YES	YES	NO	NO	NO	NO	NO
564	71-80	3	2020-03-20	POSITIVE FOR COVID	YES		Grave (>50%)	Vidro Fosco Pura	Aspecto Redondo	Pav Mosaico		Espessamento Brônquico			Central e Periferico	Dois ou Mais Lobos	Bilateral	Lobo Sup Dir	Lobo Médio	Lobo Inf Dir	Lobo Sup Esq	Lobo Inf Esq					#REF!								Unico Lobo	Unilateral						YES	YES	YES	NO	NO	NO	NO	NO
565	>80	1	2020-03-16	POSITIVE FOR COVID	NO		2 - Moderado (25-50%)	Vidro Fosco Pura		Pav Mosaico		Espessamento Brônquico		LinfadeNOmegalia	Central e Periferico	Dois ou Mais Lobos	Bilateral	Lobo Sup Dir	Lobo Médio	Lobo Inf Dir	Lobo Sup Esq	Lobo Inf Esq	YES		2 - Moderado (25-50%)	Vidro Fosco Pura	#REF!		Pav Mosaico		Espessamento Brônquico			Central e Periferico	Dois ou Mais Lobos	Bilateral	Lobo Sup Dir	Lobo Médio	Lobo Inf Dir	Lobo Sup Esq	Lobo Inf Esq	YES	NO	YES	NO	NO	NO	NO	NO
566	51-60	1	2020-03-31	POSITIVE FOR COVID	NO		1 - Leve (<25%)	Vidro Fosco Pura	Aspecto Redondo	Pav Mosaico		Espessamento Brônquico			Central e Periferico	Dois ou Mais Lobos	Bilateral	Lobo Sup Dir	Lobo Médio	Lobo Inf Dir	Lobo Sup Esq	Lobo Inf Esq					#REF!								Unico Lobo	Unilateral						NO	YES	YES	NO	NO	NO	YES	NO
567	<50	2	2020-03-21	POSITIVE FOR COVID	NO	4	1 - Leve (<25%)	Vidro Fosco e Consolidação	Aspecto Redondo	Pav Mosaico		Espessamento Brônquico			Central e Periferico	Dois ou Mais Lobos	Bilateral	Lobo Sup Dir	Lobo Médio	Lobo Inf Dir	Lobo Sup Esq	Lobo Inf Esq	YES	4	1 - Leve (<25%)	Vidro Fosco e Consolidação	#REF!	Aspecto Redondo	Pav Mosaico		Espessamento Brônquico			Central e Periferico	Dois ou Mais Lobos	Bilateral	Lobo Sup Dir	Lobo Médio	Lobo Inf Dir	Lobo Sup Esq	Lobo Inf Esq	NO	YES	YES	NO	NO	YES	NO	NO
568	51-60	1	2020-03-14	POSITIVE FOR COVID	NO	1	1 - Leve (<25%)	Vidro Fosco Pura		Pav Mosaico		Espessamento Brônquico			Periferico	Dois ou Mais Lobos	Bilateral	Lobo Sup Dir			Lobo Sup Esq		YES	1	1 - Leve (<25%)	Vidro Fosco Pura	#REF!		Pav Mosaico		Espessamento Brônquico			Periferico	Dois ou Mais Lobos	Bilateral	Lobo Sup Dir		Lobo Inf Dir		Lobo Inf Esq	YES	YES	YES	NO	NO	NO	NO	YES
569	51-60	2	2020-03-23	POSITIVE FOR COVID	NO	4	1 - Leve (<25%)	Vidro Fosco Pura		Pav Mosaico	Sinal do Halo Reverso	Espessamento Brônquico			Periferico	Dois ou Mais Lobos	Bilateral	Lobo Sup Dir	Lobo Médio	Lobo Inf Dir	Lobo Sup Esq	Lobo Inf Esq		4			#REF!								Unico Lobo	Unilateral						YES	NO	YES	NO	YES	NO	NO	NO
570	>80	2	2020-03-18	POSITIVE FOR COVID	NO	1	1 - Leve (<25%)	Vidro Fosco Pura		Pav Mosaico		Espessamento Brônquico			Central e Periferico	Dois ou Mais Lobos	Bilateral	Lobo Sup Dir			Lobo Sup Esq	Lobo Inf Esq	YES	1	1 - Leve (<25%)	Vidro Fosco e Consolidação	#REF!		Pav Mosaico		Espessamento Brônquico			Central e Periferico	Dois ou Mais Lobos	Bilateral	Lobo Sup Dir			Lobo Sup Esq	Lobo Inf Esq	NO	YES	NO	NO	NO	NO	NO	NO
571	<50	2	2020-03-11	POSITIVE FOR COVID	NO	0	1 - Leve (<25%)	Vidro Fosco Pura	Aspecto Redondo	Pav Mosaico	Sinal do Halo Reverso				Central e Periferico	Dois ou Mais Lobos	Unilateral	Lobo Sup Dir	Lobo Médio	Lobo Inf Dir			YES	0	1 - Leve (<25%)	Vidro Fosco Pura	#REF!	Aspecto Redondo	Pav Mosaico	Sinal do Halo Reverso				Central e Periferico	Dois ou Mais Lobos	Unilateral	Lobo Sup Dir	Lobo Médio	Lobo Inf Dir			YES	YES	NO	NO	NO	NO	NO	NO
572	71-80	2	2020-03-24	POSITIVE FOR COVID	NO	0	2 - Moderado (25-50%)	Vidro Fosco Pura	Aspecto Redondo	Pav Mosaico					Periferico	Dois ou Mais Lobos	Bilateral	Lobo Sup Dir	Lobo Médio	Lobo Inf Dir	Lobo Sup Esq	Lobo Inf Esq		0			#REF!								Unico Lobo	Unilateral						YES	NO	YES	NO	NO	NO	NO	NO
573	>80	2	2020-03-23	POSITIVE FOR COVID	YES	4	2 - Moderado (25-50%)	Vidro Fosco e Consolidação	Aspecto Redondo	Pav Mosaico	Sinal do Halo Reverso	Espessamento Brônquico			Central e Periferico	Dois ou Mais Lobos	Bilateral	Lobo Sup Dir	Lobo Médio	Lobo Inf Dir	Lobo Sup Esq	Lobo Inf Esq		4			#REF!								Unico Lobo	Unilateral						NO	NO	YES	NO	NO	NO	YES	NO
574	<50	1	2020-03-29	POSITIVE FOR COVID	NO	0	1 - Leve (<25%)	Vidro Fosco Pura	Aspecto Redondo	Pav Mosaico		Espessamento Brônquico			Periferico	Dois ou Mais Lobos	Bilateral		Lobo Médio			Lobo Inf Esq		0			#REF!								Unico Lobo	Unilateral						YES	NO	NO	NO	NO	NO	NO	NO
575	51-60	2	2020-03-23	POSITIVE FOR COVID	NO		2 - Moderado (25-50%)	Vidro Fosco e Consolidação		Pav Mosaico	Sinal do Halo Reverso				Central e Periferico	Dois ou Mais Lobos	Bilateral	Lobo Sup Dir	Lobo Médio	Lobo Inf Dir	Lobo Sup Esq	Lobo Inf Esq					#REF!								Unico Lobo	Unilateral						YES	YES	NO	NO	NO	NO	NO	YES
576	61-70	3	2020-03-16	POSITIVE FOR COVID	YES	1	Grave (>50%)	Vidro Fosco Pura	Aspecto Redondo	Pav Mosaico				LinfadeNOmegalia	Central e Periferico	Dois ou Mais Lobos	Bilateral	Lobo Sup Dir	Lobo Médio	Lobo Inf Dir	Lobo Sup Esq	Lobo Inf Esq	YES	1	Grave (>50%)	Vidro Fosco Pura	#REF!	Aspecto Redondo	Pav Mosaico				LinfadeNOmegalia	Central e Periferico	Dois ou Mais Lobos	Bilateral	Lobo Sup Dir	Lobo Médio	Lobo Inf Dir	Lobo Sup Esq	Lobo Inf Esq	NO	NO	NO	YES	NO	NO	NO	YES
577	61-70	2	2020-03-25	POSITIVE FOR COVID	NO	0	2 - Moderado (25-50%)	Vidro Fosco e Consolidação	Aspecto Redondo	Pav Mosaico	Sinal do Halo Reverso	Espessamento Brônquico			Central e Periferico	Dois ou Mais Lobos	Bilateral	Lobo Sup Dir	Lobo Médio	Lobo Inf Dir	Lobo Sup Esq	Lobo Inf Esq	YES	0	2 - Moderado (25-50%)	Vidro Fosco e Consolidação	#REF!	Aspecto Redondo	Pav Mosaico	Sinal do Halo Reverso	Espessamento Brônquico			Central e Periferico	Dois ou Mais Lobos	Bilateral	Lobo Sup Dir	Lobo Médio	Lobo Inf Dir	Lobo Sup Esq	Lobo Inf Esq	YES	NO	YES	NO	NO	NO	NO	YES
578	>80	2	2020-03-22	POSITIVE FOR COVID	YES	0	2 - Moderado (25-50%)	Vidro Fosco e Consolidação		Pav Mosaico		Espessamento Brônquico			Central e Periferico	Dois ou Mais Lobos	Bilateral	Lobo Sup Dir	Lobo Médio	Lobo Inf Dir	Lobo Sup Esq	Lobo Inf Esq	YES	0	2 - Moderado (25-50%)	Vidro Fosco e Consolidação	#REF!		Pav Mosaico		Espessamento Brônquico			Central e Periferico	Dois ou Mais Lobos	Bilateral	Lobo Sup Dir	Lobo Médio	Lobo Inf Dir	Lobo Sup Esq	Lobo Inf Esq	NO	YES	YES	NO	NO	NO	YES	NO
579	>80	2	2020-04-06	POSITIVE FOR COVID	NO		1 - Leve (<25%)	Vidro Fosco Pura		Pav Mosaico	Sinal do Halo Reverso	Espessamento Brônquico			Periferico	Dois ou Mais Lobos	Bilateral	Lobo Sup Dir	Lobo Médio	Lobo Inf Dir	Lobo Sup Esq	Lobo Inf Esq					#REF!								Unico Lobo	Unilateral						YES	YES	NO	NO	NO	NO	YES	YES
580	61-70	1	2020-03-24	POSITIVE FOR COVID	NO	0	1 - Leve (<25%)	Vidro Fosco e Consolidação	Aspecto Redondo	Pav Mosaico		Espessamento Brônquico			Central e Periferico	Dois ou Mais Lobos	Bilateral	Lobo Sup Dir	Lobo Médio	Lobo Inf Dir	Lobo Sup Esq	Lobo Inf Esq		0			#REF!								Unico Lobo	Unilateral						NO	YES	NO	YES	YES	NO	NO	NO
581	61-70	1	2020-03-10	POSITIVE FOR COVID	NO	3	1 - Leve (<25%)	Vidro Fosco e Consolidação		Pav Mosaico		Espessamento Brônquico			Central e Periferico	Dois ou Mais Lobos	Bilateral	Lobo Sup Dir	Lobo Médio	Lobo Inf Dir	Lobo Sup Esq	Lobo Inf Esq	Duvidosa	3	1 - Leve (<25%)	Vidro Fosco e Consolidação	#REF!		Pav Mosaico		Espessamento Brônquico			Central e Periferico	Dois ou Mais Lobos	Bilateral	Lobo Sup Dir	Lobo Médio	Lobo Inf Dir	Lobo Sup Esq	Lobo Inf Esq	YES	NO	NO	NO	NO	NO	NO	NO
582	>80	2	2020-03-18	POSITIVE FOR COVID	YES	4	2 - Moderado (25-50%)	Vidro Fosco e Consolidação	Aspecto Redondo	Pav Mosaico		Espessamento Brônquico	Derrame Pleural	LinfadeNOmegalia	Central e Periferico	Dois ou Mais Lobos	Bilateral	Lobo Sup Dir	Lobo Médio	Lobo Inf Dir	Lobo Sup Esq	Lobo Inf Esq	Duvidosa	4	2 - Moderado (25-50%)	Vidro Fosco e Consolidação	#REF!	Aspecto Redondo	Pav Mosaico		Espessamento Brônquico	Derrame Pleural		Central e Periferico	Dois ou Mais Lobos	Bilateral	Lobo Sup Dir	Lobo Médio	Lobo Inf Dir	Lobo Sup Esq	Lobo Inf Esq	YES	NO	NO	NO	NO	NO	YES	YES
583	>80	2	2020-03-27	POSITIVE FOR COVID	NO	1	1 - Leve (<25%)	Vidro Fosco Pura		Pav Mosaico		Espessamento Brônquico			Periferico	Dois ou Mais Lobos	Bilateral	Lobo Sup Dir		Lobo Inf Dir	Lobo Sup Esq	Lobo Inf Esq		1			#REF!								Unico Lobo	Unilateral						NO	YES	YES	NO	NO	NO	NO	NO
584	51-60	2	2020-03-23	POSITIVE FOR COVID	NO	4	2 - Moderado (25-50%)	Vidro Fosco Pura							Central e Periferico	Dois ou Mais Lobos	Bilateral	Lobo Sup Dir	Lobo Médio	Lobo Inf Dir	Lobo Sup Esq	Lobo Inf Esq		4			#REF!								Unico Lobo	Unilateral						YES	YES	YES	NO	NO	NO	NO	YES
585	51-60	1	2020-03-12	POSITIVE FOR COVID	NO	0	1 - Leve (<25%)	Vidro Fosco Pura	Aspecto Redondo	Pav Mosaico	Sinal do Halo Reverso				Central e Periferico	Dois ou Mais Lobos	Bilateral	Lobo Sup Dir	Lobo Médio	Lobo Inf Dir	Lobo Sup Esq	Lobo Inf Esq	YES	0	1 - Leve (<25%)	Vidro Fosco Pura	#REF!	Aspecto Redondo	Pav Mosaico	Sinal do Halo Reverso				Central e Periferico	Dois ou Mais Lobos	Bilateral	Lobo Sup Dir	Lobo Médio	Lobo Inf Dir	Lobo Sup Esq	Lobo Inf Esq	NO	YES	YES	NO	YES	NO	NO	NO
586	71-80	1	2020-03-14	POSITIVE FOR COVID	NO	0	1 - Leve (<25%)	Vidro Fosco Pura				Espessamento Brônquico			Periferico	Unico Lobo	Unilateral					Lobo Inf Esq	Duvidosa	0	1 - Leve (<25%)	Vidro Fosco Pura	#REF!				Espessamento Brônquico			Periferico	Unico Lobo	Unilateral					Lobo Inf Esq	NO	YES	YES	NO	YES	NO	YES	NO
587	71-80	2	2020-03-13	POSITIVE FOR COVID	YES	1	Grave (>50%)	Vidro Fosco e Consolidação		Pav Mosaico		Espessamento Brônquico		LinfadeNOmegalia	Central e Periferico	Dois ou Mais Lobos	Bilateral	Lobo Sup Dir	Lobo Médio	Lobo Inf Dir	Lobo Sup Esq	Lobo Inf Esq	YES	1	Grave (>50%)	Vidro Fosco e Consolidação	#REF!		Pav Mosaico		Espessamento Brônquico		LinfadeNOmegalia	Central e Periferico	Dois ou Mais Lobos	Bilateral	Lobo Sup Dir	Lobo Médio	Lobo Inf Dir	Lobo Sup Esq	Lobo Inf Esq	YES	YES	YES	NO	NO	NO	NO	NO
588	>80	2	2020-03-26	POSITIVE FOR COVID	NO	5	2 - Moderado (25-50%)	Vidro Fosco e Consolidação	Aspecto Redondo	Pav Mosaico		Espessamento Brônquico			Central e Periferico	Dois ou Mais Lobos	Bilateral	Lobo Sup Dir	Lobo Médio	Lobo Inf Dir	Lobo Sup Esq	Lobo Inf Esq		5			#REF!								Unico Lobo	Unilateral						NO	YES	NO	NO	NO	NO	YES	YES
589	<50	2	2020-03-30	POSITIVE FOR COVID	YES	0	2 - Moderado (25-50%)	Vidro Fosco Pura	Aspecto Redondo	Pav Mosaico		Espessamento Brônquico			Central e Periferico	Dois ou Mais Lobos	Bilateral	Lobo Sup Dir	Lobo Médio	Lobo Inf Dir	Lobo Sup Esq	Lobo Inf Esq		0			#REF!								Unico Lobo	Unilateral						NO	NO	NO	NO	NO	NO	NO	NO
590	>80	3	2020-03-16	POSITIVE FOR COVID	YES	3	Grave (>50%)	Vidro Fosco Pura		Pav Mosaico					Central e Periferico	Dois ou Mais Lobos	Bilateral	Lobo Sup Dir	Lobo Médio	Lobo Inf Dir	Lobo Sup Esq	Lobo Inf Esq	YES	3	Grave (>50%)	Vidro Fosco Pura	#REF!		Pav Mosaico					Central e Periferico	Dois ou Mais Lobos	Bilateral	Lobo Sup Dir	Lobo Médio	Lobo Inf Dir	Lobo Sup Esq	Lobo Inf Esq	YES	NO	NO	YES	NO	NO	NO	NO
591	61-70	2	2020-03-29	POSITIVE FOR COVID	YES		1 - Leve (<25%)	Vidro Fosco Pura							Periferico	Dois ou Mais Lobos	Bilateral	Lobo Sup Dir	Lobo Médio	Lobo Inf Dir	Lobo Sup Esq	Lobo Inf Esq					#REF!								Unico Lobo	Unilateral						NO	YES	NO	NO	NO	NO	NO	NO
592	71-80	3	2020-03-22	POSITIVE FOR COVID	YES	4	Grave (>50%)	Vidro Fosco e Consolidação		Pav Mosaico		Espessamento Brônquico			Central e Periferico	Dois ou Mais Lobos	Bilateral	Lobo Sup Dir	Lobo Médio	Lobo Inf Dir	Lobo Sup Esq	Lobo Inf Esq	YES	4	Grave (>50%)	Vidro Fosco e Consolidação	#REF!		Pav Mosaico					Central e Periferico	Dois ou Mais Lobos	Bilateral	Lobo Sup Dir	Lobo Médio	Lobo Inf Dir	Lobo Sup Esq	Lobo Inf Esq	YES	YES	YES	NO	NO	NO	NO	NO
593	61-70	1	2020-03-23	POSITIVE FOR COVID	NO	0	1 - Leve (<25%)	Vidro Fosco Pura	Aspecto Redondo	Pav Mosaico		Espessamento Brônquico			Periferico	Dois ou Mais Lobos	Unilateral	Lobo Sup Dir	Lobo Médio	Lobo Inf Dir				0			#REF!								Unico Lobo	Unilateral						NO	YES	YES	NO	NO	NO	YES	YES
594	>80	2	2020-03-20	POSITIVE FOR COVID	YES	3	Grave (>50%)	Vidro Fosco e Consolidação	Aspecto Redondo	Pav Mosaico		Espessamento Brônquico			Central e Periferico	Dois ou Mais Lobos	Bilateral	Lobo Sup Dir	Lobo Médio	Lobo Inf Dir	Lobo Sup Esq	Lobo Inf Esq	YES	3	Grave (>50%)	Vidro Fosco e Consolidação	#REF!	Aspecto Redondo	Pav Mosaico		Espessamento Brônquico	Derrame Pleural		Central e Periferico	Dois ou Mais Lobos	Bilateral	Lobo Sup Dir	Lobo Médio	Lobo Inf Dir	Lobo Sup Esq	Lobo Inf Esq	YES	YES	YES	NO	NO	NO	NO	NO
595	61-70	1	2020-03-21	POSITIVE FOR COVID	NO	0	1 - Leve (<25%)	Vidro Fosco Pura	Aspecto Redondo						Central e Periferico	Dois ou Mais Lobos	Bilateral	Lobo Sup Dir	Lobo Médio	Lobo Inf Dir	Lobo Sup Esq	Lobo Inf Esq		0			#REF!								Unico Lobo	Unilateral						YES	YES	NO	YES	NO	NO	NO	NO
596	51-60	2	2020-03-21	POSITIVE FOR COVID	NO	1	2 - Moderado (25-50%)	Vidro Fosco Pura	Aspecto Redondo	Pav Mosaico	Sinal do Halo Reverso				Periferico	Dois ou Mais Lobos	Bilateral	Lobo Sup Dir	Lobo Médio	Lobo Inf Dir	Lobo Sup Esq	Lobo Inf Esq		1			#REF!								Unico Lobo	Unilateral						YES	YES	YES	NO	NO	NO	NO	NO
597	61-70	2	2020-03-02	POSITIVE FOR COVID	NO	6	2 - Moderado (25-50%)	Vidro Fosco e Consolidação	Aspecto Redondo	Pav Mosaico					Central e Periferico	Dois ou Mais Lobos	Bilateral	Lobo Sup Dir	Lobo Médio	Lobo Inf Dir	Lobo Sup Esq	Lobo Inf Esq	YES	6	2 - Moderado (25-50%)	Vidro Fosco e Consolidação	#REF!	Aspecto Redondo	Pav Mosaico					Central e Periferico	Dois ou Mais Lobos	Bilateral	Lobo Sup Dir	Lobo Médio	Lobo Inf Dir	Lobo Sup Esq	Lobo Inf Esq	YES	YES	YES	NO	YES	NO	NO	NO
598	<50	1	2020-03-27	POSITIVE FOR COVID	NO	0	Não Se Aplica	Ausência de Opacidades				Espessamento Brônquico			Ausência de Opacidades									0			#REF!								Unico Lobo	Unilateral						YES	YES	YES	NO	NO	YES	NO	NO
599	51-60	2	2020-03-27	POSITIVE FOR COVID	NO		1 - Leve (<25%)	Vidro Fosco Pura	Aspecto Redondo	Pav Mosaico					Periferico	Dois ou Mais Lobos	Bilateral	Lobo Sup Dir	Lobo Médio	Lobo Inf Dir	Lobo Sup Esq	Lobo Inf Esq					#REF!								Unico Lobo	Unilateral						NO	NO	YES	NO	YES	NO	NO	NO
600	<50	1	2020-03-29	POSITIVE FOR COVID	NO	0	1 - Leve (<25%)	Vidro Fosco Pura	Aspecto Redondo			Espessamento Brônquico			Periferico	Dois ou Mais Lobos	Bilateral	Lobo Sup Dir		Lobo Inf Dir		Lobo Inf Esq		0			#REF!								Unico Lobo	Unilateral						NO	YES	NO	NO	NO	NO	NO	NO
601	<50	1	2020-04-01	POSITIVE FOR COVID	NO		1 - Leve (<25%)	Vidro Fosco Pura	Aspecto Redondo						Periferico	Unico Lobo	Unilateral					Lobo Inf Esq					#REF!								Unico Lobo	Unilateral						YES	YES	YES	NO	NO	NO	NO	YES
602	>80	2	2020-03-30	POSITIVE FOR COVID	NO		1 - Leve (<25%)	Vidro Fosco e Consolidação	Aspecto Redondo			Espessamento Brônquico			Periferico	Dois ou Mais Lobos	Unilateral	Lobo Sup Dir	Lobo Médio								#REF!								Unico Lobo	Unilateral						YES	YES	YES	YES	NO	NO	NO	NO
603	71-80	3	2020-03-14	POSITIVE FOR COVID	YES		Grave (>50%)	Vidro Fosco Pura		Pav Mosaico					Central e Periferico	Dois ou Mais Lobos	Bilateral	Lobo Sup Dir	Lobo Médio	Lobo Inf Dir	Lobo Sup Esq	Lobo Inf Esq	YES		Grave (>50%)	Vidro Fosco Pura	#REF!		Pav Mosaico					Central e Periferico	Dois ou Mais Lobos	Bilateral	Lobo Sup Dir	Lobo Médio	Lobo Inf Dir	Lobo Sup Esq	Lobo Inf Esq	YES	NO	YES	NO	NO	YES	NO	NO
604	<50	1	2020-03-30	POSITIVE FOR COVID	NO		1 - Leve (<25%)	Vidro Fosco Pura	Aspecto Redondo	Pav Mosaico		Espessamento Brônquico			Central e Periferico	Unico Lobo	Unilateral			Lobo Inf Dir							#REF!								Unico Lobo	Unilateral						NO	YES	YES	NO	NO	NO	NO	NO
605	<50	1	2020-04-04	POSITIVE FOR COVID	NO	0	1 - Leve (<25%)	Vidro Fosco Pura	Aspecto Redondo			Espessamento Brônquico			Periferico	Unico Lobo	Unilateral			Lobo Inf Dir				0			#REF!								Unico Lobo	Unilateral						NO	YES	YES	NO	NO	NO	NO	NO
606	51-60	2	2020-03-17	POSITIVE FOR COVID	NO	1	1 - Leve (<25%)	Vidro Fosco Pura	Aspecto Redondo	Pav Mosaico		Espessamento Brônquico			Periferico	Dois ou Mais Lobos	Bilateral	Lobo Sup Dir	Lobo Médio	Lobo Inf Dir	Lobo Sup Esq	Lobo Inf Esq	YES	1	1 - Leve (<25%)	Vidro Fosco Pura	#REF!	Aspecto Redondo	Pav Mosaico		Espessamento Brônquico			Periferico	Dois ou Mais Lobos	Bilateral	Lobo Sup Dir	Lobo Médio	Lobo Inf Dir	Lobo Sup Esq	Lobo Inf Esq	NO	YES	YES	NO	NO	NO	NO	NO
607	>80	3	2020-03-08	POSITIVE FOR COVID	YES	4	Grave (>50%)	Vidro Fosco e Consolidação		Pav Mosaico		Espessamento Brônquico	Derrame Pleural		Central e Periferico	Dois ou Mais Lobos	Bilateral	Lobo Sup Dir	Lobo Médio	Lobo Inf Dir	Lobo Sup Esq	Lobo Inf Esq	YES	4	Grave (>50%)	Vidro Fosco e Consolidação	#REF!	Aspecto Redondo	Pav Mosaico		Espessamento Brônquico	Derrame Pleural		Central e Periferico	Dois ou Mais Lobos	Bilateral	Lobo Sup Dir	Lobo Médio	Lobo Inf Dir	Lobo Sup Esq	Lobo Inf Esq	YES	YES	YES	NO	NO	NO	NO	NO
608	71-80	1	2020-03-29	POSITIVE FOR COVID	NO	1	2 - Moderado (25-50%)	Vidro Fosco e Consolidação	Aspecto Redondo	Pav Mosaico		Espessamento Brônquico			Central e Periferico	Dois ou Mais Lobos	Bilateral	Lobo Sup Dir	Lobo Médio	Lobo Inf Dir	Lobo Sup Esq	Lobo Inf Esq		1			#REF!								Unico Lobo	Unilateral						NO	NO	YES	YES	NO	NO	NO	NO
609	>80	1	2020-03-13	POSITIVE FOR COVID	YES		Grave (>50%)	Vidro Fosco e Consolidação			Sinal do Halo Reverso	Espessamento Brônquico		LinfadeNOmegalia	Central e Periferico	Dois ou Mais Lobos	Bilateral			Lobo Inf Dir	Lobo Sup Esq	Lobo Inf Esq	YES		Grave (>50%)	Vidro Fosco e Consolidação	#REF!			Sinal do Halo Reverso	Espessamento Brônquico		LinfadeNOmegalia	Central e Periferico	Dois ou Mais Lobos	Bilateral	Lobo Sup Dir	Lobo Médio	Lobo Inf Dir	Lobo Sup Esq	Lobo Inf Esq	NO	YES	YES	NO	NO	NO	NO	NO
610	>80	3	2020-03-31	POSITIVE FOR COVID	YES		2 - Moderado (25-50%)	Vidro Fosco e Consolidação	Aspecto Redondo	Pav Mosaico	Sinal do Halo Reverso	Espessamento Brônquico			Central e Periferico	Dois ou Mais Lobos	Bilateral	Lobo Sup Dir	Lobo Médio	Lobo Inf Dir	Lobo Sup Esq	Lobo Inf Esq					#REF!								Unico Lobo	Unilateral						NO	NO	NO	NO	NO	NO	YES	YES
611	<50	1	2020-03-16	POSITIVE FOR COVID	NO	1	1 - Leve (<25%)	Vidro Fosco Pura	Aspecto Redondo	Pav Mosaico	Sinal do Halo Reverso				Periferico	Dois ou Mais Lobos	Bilateral	Lobo Sup Dir	Lobo Médio	Lobo Inf Dir		Lobo Inf Esq	YES	1	1 - Leve (<25%)	Vidro Fosco Pura	#REF!	Aspecto Redondo	Pav Mosaico					Periferico	Dois ou Mais Lobos	Unilateral	Lobo Sup Dir	Lobo Médio	Lobo Inf Dir			NO	YES	NO	NO	YES	NO	NO	NO
612	<50	1	2020-03-25	POSITIVE FOR COVID	NO	4	1 - Leve (<25%)	Vidro Fosco e Consolidação	Aspecto Redondo	Pav Mosaico	Sinal do Halo Reverso	Espessamento Brônquico			Periferico	Dois ou Mais Lobos	Bilateral	Lobo Sup Dir		Lobo Inf Dir	Lobo Sup Esq	Lobo Inf Esq		4			#REF!								Unico Lobo	Unilateral						NO	NO	YES	YES	NO	NO	NO	YES
613	<50	1	2020-04-06	POSITIVE FOR COVID	NO	0	Não Se Aplica	Ausência de Opacidades				Espessamento Brônquico			Ausência de Opacidades									0			#REF!								Unico Lobo	Unilateral						NO	NO	NO	NO	NO	NO	NO	NO
614	<50	1	2020-04-01	POSITIVE FOR COVID	NO		1 - Leve (<25%)	Vidro Fosco e Consolidação	Aspecto Redondo	Pav Mosaico	Sinal do Halo Reverso	Espessamento Brônquico			Periferico	Unico Lobo	Unilateral			Lobo Inf Dir							#REF!								Unico Lobo	Unilateral						NO	NO	YES	NO	NO	NO	NO	NO
615	51-60	2	2020-03-26	POSITIVE FOR COVID	NO	1	2 - Moderado (25-50%)	Vidro Fosco e Consolidação	Aspecto Redondo	Pav Mosaico	Sinal do Halo Reverso	Espessamento Brônquico			Central e Periferico	Dois ou Mais Lobos	Bilateral	Lobo Sup Dir	Lobo Médio	Lobo Inf Dir	Lobo Sup Esq	Lobo Inf Esq		1			#REF!								Unico Lobo	Unilateral						YES	YES	YES	NO	NO	NO	YES	NO
616	71-80	2	2020-03-26	POSITIVE FOR COVID	NO		1 - Leve (<25%)	Vidro Fosco e Consolidação	Aspecto Redondo	Pav Mosaico	Sinal do Halo Reverso	Espessamento Brônquico			Periferico	Dois ou Mais Lobos	Bilateral	Lobo Sup Dir	Lobo Médio	Lobo Inf Dir	Lobo Sup Esq	Lobo Inf Esq					#REF!								Unico Lobo	Unilateral						NO	YES	YES	NO	NO	NO	NO	NO
617	71-80	2	2020-03-06	POSITIVE FOR COVID	NO		2 - Moderado (25-50%)	Vidro Fosco e Consolidação	Aspecto Redondo	Pav Mosaico	Sinal do Halo Reverso	Espessamento Brônquico			Central e Periferico	Dois ou Mais Lobos	Bilateral	Lobo Sup Dir	Lobo Médio	Lobo Inf Dir	Lobo Sup Esq	Lobo Inf Esq					#REF!								Unico Lobo	Unilateral						NO	YES	NO	NO	YES	NO	NO	NO
618	>80	2	2020-03-26	POSITIVE FOR COVID	NO	0	1 - Leve (<25%)	Vidro Fosco Pura		Pav Mosaico		Espessamento Brônquico			Periferico	Dois ou Mais Lobos	Bilateral	Lobo Sup Dir	Lobo Médio	Lobo Inf Dir	Lobo Sup Esq	Lobo Inf Esq		0			#REF!								Unico Lobo	Unilateral						YES	NO	NO	YES	NO	NO	NO	NO
619	61-70	1	2020-03-09	POSITIVE FOR COVID	YES		1 - Leve (<25%)	Vidro Fosco e Consolidação	Aspecto Redondo	Pav Mosaico	Sinal do Halo Reverso				Periferico	Dois ou Mais Lobos	Bilateral	Lobo Sup Dir	Lobo Médio	Lobo Inf Dir	Lobo Sup Esq	Lobo Inf Esq	YES		1 - Leve (<25%)	Vidro Fosco e Consolidação	#REF!	Aspecto Redondo	Pav Mosaico	Sinal do Halo Reverso				Periferico	Dois ou Mais Lobos	Bilateral	Lobo Sup Dir	Lobo Médio	Lobo Inf Dir	Lobo Sup Esq	Lobo Inf Esq	NO	YES	YES	NO	NO	NO	NO	NO
620	51-60	1	2020-03-30	POSITIVE FOR COVID	NO	0	1 - Leve (<25%)	Vidro Fosco Pura	Aspecto Redondo			Espessamento Brônquico			Periferico	Unico Lobo	Unilateral					Lobo Inf Esq		0			#REF!								Unico Lobo	Unilateral						NO	NO	YES	NO	NO	YES	NO	NO
621	<50	1	2020-03-24	POSITIVE FOR COVID	NO	0	1 - Leve (<25%)	Vidro Fosco e Consolidação	Aspecto Redondo	Pav Mosaico		Espessamento Brônquico			Central e Periferico	Unico Lobo	Unilateral				Lobo Sup Esq			0			#REF!								Unico Lobo	Unilateral						NO	YES	NO	NO	NO	NO	NO	NO
622	<50	1	2020-03-26	POSITIVE FOR COVID	NO	0	1 - Leve (<25%)	Vidro Fosco Pura							Periferico	Unico Lobo	Unilateral			Lobo Inf Dir				0			#REF!								Unico Lobo	Unilateral						NO	NO	YES	NO	NO	NO	NO	NO
623	61-70	2	2020-03-26	POSITIVE FOR COVID	NO		2 - Moderado (25-50%)	Vidro Fosco Pura	Aspecto Redondo	Pav Mosaico					Central e Periferico	Dois ou Mais Lobos	Bilateral	Lobo Sup Dir	Lobo Médio	Lobo Inf Dir	Lobo Sup Esq	Lobo Inf Esq					#REF!								Unico Lobo	Unilateral						YES	YES	YES	NO	NO	NO	NO	NO
624	51-60	2	2020-03-27	POSITIVE FOR COVID	NO	4	1 - Leve (<25%)	Vidro Fosco e Consolidação	Aspecto Redondo	Pav Mosaico	Sinal do Halo Reverso	Espessamento Brônquico			Periferico	Dois ou Mais Lobos	Bilateral	Lobo Sup Dir	Lobo Médio	Lobo Inf Dir	Lobo Sup Esq	Lobo Inf Esq		4			#REF!								Unico Lobo	Unilateral						NO	YES	NO	NO	NO	NO	YES	NO
625	71-80	3	2020-03-29	POSITIVE FOR COVID	NO		Grave (>50%)	Vidro Fosco Pura		Pav Mosaico		Espessamento Brônquico			Central e Periferico	Dois ou Mais Lobos	Bilateral	Lobo Sup Dir	Lobo Médio	Lobo Inf Dir	Lobo Sup Esq	Lobo Inf Esq					#REF!								Unico Lobo	Unilateral						YES	NO	YES	NO	NO	NO	NO	NO
626	61-70	2	2020-03-14	POSITIVE FOR COVID	NO	4	1 - Leve (<25%)	Vidro Fosco e Consolidação	Aspecto Redondo	Pav Mosaico					Central e Periferico	Dois ou Mais Lobos	Bilateral	Lobo Sup Dir	Lobo Médio	Lobo Inf Dir	Lobo Sup Esq	Lobo Inf Esq	YES	4	1 - Leve (<25%)	Vidro Fosco e Consolidação	#REF!	Aspecto Redondo	Pav Mosaico					Central e Periferico	Dois ou Mais Lobos	Bilateral	Lobo Sup Dir	Lobo Médio	Lobo Inf Dir	Lobo Sup Esq	Lobo Inf Esq	YES	YES	YES	NO	NO	NO	NO	NO
627	<50	1	2020-03-20	POSITIVE FOR COVID	NO	1	1 - Leve (<25%)	Vidro Fosco Pura	Aspecto Redondo			Espessamento Brônquico			Central e Periferico	Dois ou Mais Lobos	Bilateral	Lobo Sup Dir		Lobo Inf Dir	Lobo Sup Esq			1			#REF!								Unico Lobo	Unilateral						YES	NO	YES	NO	NO	NO	NO	NO
628	<50	2	2020-03-19	POSITIVE FOR COVID	NO	1	2 - Moderado (25-50%)	Vidro Fosco e Consolidação	Aspecto Redondo	Pav Mosaico					Central e Periferico	Dois ou Mais Lobos	Bilateral	Lobo Sup Dir	Lobo Médio	Lobo Inf Dir	Lobo Sup Esq	Lobo Inf Esq	YES	1	2 - Moderado (25-50%)	Vidro Fosco e Consolidação	#REF!	Aspecto Redondo	Pav Mosaico					Central e Periferico	Dois ou Mais Lobos	Bilateral	Lobo Sup Dir	Lobo Médio	Lobo Inf Dir	Lobo Sup Esq	Lobo Inf Esq	YES	YES	NO	NO	NO	NO	NO	NO
629	<50	1	2020-03-28	POSITIVE FOR COVID	NO	0	1 - Leve (<25%)	Vidro Fosco Pura	Aspecto Redondo	Pav Mosaico					Central e Periferico	Dois ou Mais Lobos	Bilateral		Lobo Médio	Lobo Inf Dir	Lobo Sup Esq			0			#REF!								Unico Lobo	Unilateral						NO	NO	YES	YES	NO	NO	NO	NO
630	51-60	2	2020-04-01	POSITIVE FOR COVID	NO	0	1 - Leve (<25%)	Vidro Fosco Pura							Central e Periferico	Unico Lobo	Unilateral			Lobo Inf Dir				0			#REF!								Unico Lobo	Unilateral						NO	YES	YES	NO	NO	NO	NO	YES
631	61-70	2	2020-03-28	POSITIVE FOR COVID	NO	0	2 - Moderado (25-50%)	Vidro Fosco Pura		Pav Mosaico	Sinal do Halo Reverso	Espessamento Brônquico			Central e Periferico	Dois ou Mais Lobos	Bilateral	Lobo Sup Dir	Lobo Médio	Lobo Inf Dir	Lobo Sup Esq	Lobo Inf Esq		0			#REF!								Unico Lobo	Unilateral						YES	NO	NO	NO	NO	YES	YES	YES
632	61-70	2	2020-03-16	POSITIVE FOR COVID	NO		1 - Leve (<25%)	Vidro Fosco Pura		Pav Mosaico		Espessamento Brônquico			Periferico	Unico Lobo	Unilateral			Lobo Inf Dir			YES		1 - Leve (<25%)	Vidro Fosco Pura	#REF!		Pav Mosaico		Espessamento Brônquico			Periferico	Unico Lobo	Unilateral			Lobo Inf Dir			YES	YES	YES	NO	NO	NO	NO	YES
633	61-70	2	2020-03-14	POSITIVE FOR COVID	NO	1	2 - Moderado (25-50%)	Vidro Fosco e Consolidação	Aspecto Redondo	Pav Mosaico	Sinal do Halo Reverso				Central e Periferico	Dois ou Mais Lobos	Bilateral	Lobo Sup Dir	Lobo Médio	Lobo Inf Dir	Lobo Sup Esq	Lobo Inf Esq	YES	1	2 - Moderado (25-50%)	Vidro Fosco e Consolidação	#REF!	Aspecto Redondo	Pav Mosaico	Sinal do Halo Reverso				Central e Periferico	Dois ou Mais Lobos	Bilateral	Lobo Sup Dir	Lobo Médio	Lobo Inf Dir	Lobo Sup Esq	Lobo Inf Esq	YES	YES	YES	NO	NO	NO	NO	NO
634	51-60	1	2020-03-12	POSITIVE FOR COVID	NO	0	1 - Leve (<25%)	Vidro Fosco e Consolidação		Pav Mosaico	Sinal do Halo Reverso	Espessamento Brônquico			Periferico	Unico Lobo	Unilateral					Lobo Inf Esq	YES	0	1 - Leve (<25%)	Vidro Fosco e Consolidação	#REF!		Pav Mosaico	Sinal do Halo Reverso	Espessamento Brônquico			Periferico	Unico Lobo	Unilateral					Lobo Inf Esq	NO	YES	NO	NO	YES	NO	NO	YES
635	<50	1	2020-03-27	POSITIVE FOR COVID	NO	0	1 - Leve (<25%)	Vidro Fosco e Consolidação	Aspecto Redondo	Pav Mosaico	Sinal do Halo Reverso				Periferico	Dois ou Mais Lobos	Unilateral	Lobo Sup Dir		Lobo Inf Dir	Lobo Sup Esq	Lobo Inf Esq		0			#REF!								Unico Lobo	Unilateral						YES	YES	YES	NO	NO	NO	NO	NO
636	<50	1	2020-03-28	POSITIVE FOR COVID	NO	0	1 - Leve (<25%)	Vidro Fosco e Consolidação	Aspecto Redondo	Pav Mosaico		Espessamento Brônquico			Central e Periferico	Dois ou Mais Lobos	Bilateral	Lobo Sup Dir		Lobo Inf Dir	Lobo Sup Esq	Lobo Inf Esq		0			#REF!								Unico Lobo	Unilateral						NO	NO	NO	NO	YES	YES	NO	NO
637	61-70	2	2020-03-16	POSITIVE FOR COVID	NO	4	Grave (>50%)	Vidro Fosco e Consolidação	Aspecto Redondo	Pav Mosaico		Espessamento Brônquico			Central e Periferico	Dois ou Mais Lobos	Bilateral	Lobo Sup Dir	Lobo Médio	Lobo Inf Dir	Lobo Sup Esq	Lobo Inf Esq	YES	4	Grave (>50%)	Vidro Fosco e Consolidação	#REF!	Aspecto Redondo	Pav Mosaico		Espessamento Brônquico			Central e Periferico	Dois ou Mais Lobos	Bilateral	Lobo Sup Dir	Lobo Médio	Lobo Inf Dir	Lobo Sup Esq	Lobo Inf Esq	YES	YES	YES	NO	YES	NO	NO	NO
638	71-80	2	2020-03-23	POSITIVE FOR COVID	YES		2 - Moderado (25-50%)	Vidro Fosco e Consolidação		Pav Mosaico		Espessamento Brônquico			Central e Periferico	Dois ou Mais Lobos	Bilateral	Lobo Sup Dir	Lobo Médio	Lobo Inf Dir	Lobo Sup Esq	Lobo Inf Esq	YES		2 - Moderado (25-50%)	Vidro Fosco e Consolidação	#REF!		Pav Mosaico		Espessamento Brônquico			Central e Periferico	Dois ou Mais Lobos	Bilateral	Lobo Sup Dir	Lobo Médio	Lobo Inf Dir	Lobo Sup Esq	Lobo Inf Esq	YES	YES	YES	NO	NO	NO	YES	NO
639	<50	1	2020-03-26	POSITIVE FOR COVID	NO	0	1 - Leve (<25%)	Vidro Fosco Pura	Aspecto Redondo	Pav Mosaico					Central e Periferico	Dois ou Mais Lobos	Bilateral	Lobo Sup Dir	Lobo Médio	Lobo Inf Dir	Lobo Sup Esq	Lobo Inf Esq		0			#REF!								Unico Lobo	Unilateral						NO	YES	NO	NO	NO	NO	NO	NO
640	51-60	1	2020-03-18	POSITIVE FOR COVID	NO		1 - Leve (<25%)	Vidro Fosco Pura	Aspecto Redondo	Pav Mosaico					Periferico	Dois ou Mais Lobos	Bilateral			Lobo Inf Dir	Lobo Sup Esq	Lobo Inf Esq	YES		1 - Leve (<25%)	Vidro Fosco Pura	#REF!	Aspecto Redondo	Pav Mosaico					Periferico	Dois ou Mais Lobos	Bilateral			Lobo Inf Dir	Lobo Sup Esq	Lobo Inf Esq	YES	YES	YES	YES	YES	NO	NO	NO
641	<50	1	2020-03-14	POSITIVE FOR COVID	NO	0	NOrmal	Ausência de Opacidades							Ausência de Opacidades								Não	0	NOrmal	Ausência de Opacidades	#REF!							Ausência de Opacidades								NO	YES	YES	NO	NO	NO	NO	NO
642	71-80	2	2020-03-14	POSITIVE FOR COVID	NO	1	1 - Leve (<25%)	Vidro Fosco Pura	Aspecto Redondo	Pav Mosaico	Sinal do Halo Reverso				Central e Periferico	Dois ou Mais Lobos	Bilateral	Lobo Sup Dir	Lobo Médio	Lobo Inf Dir	Lobo Sup Esq	Lobo Inf Esq	YES	1	1 - Leve (<25%)	Vidro Fosco Pura	#REF!	Aspecto Redondo	Pav Mosaico	Sinal do Halo Reverso				Central e Periferico	Dois ou Mais Lobos	Bilateral	Lobo Sup Dir	Lobo Médio	Lobo Inf Dir	Lobo Sup Esq	Lobo Inf Esq	YES	NO	YES	NO	NO	NO	NO	YES
643	61-70	3	2020-03-07	POSITIVE FOR COVID	YES		Grave (>50%)	Vidro Fosco e Consolidação		Pav Mosaico		Espessamento Brônquico	Derrame Pleural		Central e Periferico	Dois ou Mais Lobos	Bilateral	Lobo Sup Dir	Lobo Médio	Lobo Inf Dir	Lobo Sup Esq	Lobo Inf Esq					#REF!								Unico Lobo	Unilateral						YES	NO	YES	NO	NO	NO	YES	NO
644	51-60	3	2020-03-19	POSITIVE FOR COVID	YES	1	Grave (>50%)	Vidro Fosco Pura	Aspecto Redondo	Pav Mosaico					Central e Periferico	Dois ou Mais Lobos	Bilateral	Lobo Sup Dir	Lobo Médio	Lobo Inf Dir	Lobo Sup Esq	Lobo Inf Esq		1			#REF!								Unico Lobo	Unilateral						YES	NO	YES	NO	NO	NO	NO	YES
645	61-70	2	2020-03-13	POSITIVE FOR COVID	NO	4	2 - Moderado (25-50%)	Vidro Fosco e Consolidação	Aspecto Redondo	Pav Mosaico	Sinal do Halo Reverso	Espessamento Brônquico			Central e Periferico	Dois ou Mais Lobos	Bilateral	Lobo Sup Dir	Lobo Médio	Lobo Inf Dir	Lobo Sup Esq	Lobo Inf Esq	YES	4	2 - Moderado (25-50%)	Vidro Fosco e Consolidação	#REF!	Aspecto Redondo	Pav Mosaico	Sinal do Halo Reverso	Espessamento Brônquico			Central e Periferico	Dois ou Mais Lobos	Bilateral	Lobo Sup Dir	Lobo Médio	Lobo Inf Dir	Lobo Sup Esq	Lobo Inf Esq	YES	YES	YES	NO	NO	NO	NO	NO
646	>80	2	2020-03-21	POSITIVE FOR COVID	YES		1 - Leve (<25%)	Vidro Fosco Pura		Pav Mosaico		Espessamento Brônquico			Central e Periferico	Dois ou Mais Lobos	Unilateral				Lobo Sup Esq	Lobo Inf Esq	Duvidosa		1 - Leve (<25%)	Vidro Fosco Pura	#REF!		Pav Mosaico		Espessamento Brônquico			Central e Periferico	Dois ou Mais Lobos	Unilateral				Lobo Sup Esq	Lobo Inf Esq	YES	NO	NO	NO	NO	NO	NO	NO
647	51-60	1	2020-03-24	POSITIVE FOR COVID	NO	0	1 - Leve (<25%)	Vidro Fosco Pura	Aspecto Redondo	Pav Mosaico		Espessamento Brônquico			Central e Periferico	Dois ou Mais Lobos	Bilateral	Lobo Sup Dir	Lobo Médio	Lobo Inf Dir	Lobo Sup Esq	Lobo Inf Esq		0			#REF!								Unico Lobo	Unilateral						YES	NO	NO	NO	NO	NO	YES	NO
648	71-80	2	2020-03-25	POSITIVE FOR COVID	NO	1	2 - Moderado (25-50%)	Vidro Fosco Pura		Pav Mosaico		Espessamento Brônquico			Central e Periferico	Dois ou Mais Lobos	Bilateral	Lobo Sup Dir			Lobo Sup Esq	Lobo Inf Esq		1			#REF!								Unico Lobo	Unilateral						NO	NO	NO	NO	NO	NO	NO	NO
649	>80	3	2020-03-19	POSITIVE FOR COVID	YES		Grave (>50%)	Vidro Fosco e Consolidação	Aspecto Redondo	Pav Mosaico					Central e Periferico	Dois ou Mais Lobos	Bilateral	Lobo Sup Dir	Lobo Médio	Lobo Inf Dir	Lobo Sup Esq	Lobo Inf Esq	YES		Grave (>50%)	Vidro Fosco e Consolidação	#REF!	Aspecto Redondo	Pav Mosaico		Espessamento Brônquico			Central e Periferico	Dois ou Mais Lobos	Bilateral	Lobo Sup Dir	Lobo Médio	Lobo Inf Dir	Lobo Sup Esq	Lobo Inf Esq	YES	YES	YES	NO	NO	YES	NO	NO
650	51-60	3	2020-03-22	POSITIVE FOR COVID	YES	2	Grave (>50%)	Vidro Fosco e Consolidação	Aspecto Redondo	Pav Mosaico		Espessamento Brônquico			Central e Periferico	Dois ou Mais Lobos	Bilateral	Lobo Sup Dir	Lobo Médio	Lobo Inf Dir	Lobo Sup Esq	Lobo Inf Esq		2			#REF!								Unico Lobo	Unilateral						YES	NO	NO	NO	NO	NO	NO	NO
651	>80	2	2020-03-16	POSITIVE FOR COVID	YES	1	2 - Moderado (25-50%)	Vidro Fosco e Consolidação		Pav Mosaico	Sinal do Halo Reverso	Espessamento Brônquico			Central e Periferico	Dois ou Mais Lobos	Bilateral	Lobo Sup Dir	Lobo Médio	Lobo Inf Dir	Lobo Sup Esq	Lobo Inf Esq	YES	1	1 - Leve (<25%)	Vidro Fosco e Consolidação	#REF!		Pav Mosaico	Sinal do Halo Reverso	Espessamento Brônquico			Central e Periferico	Dois ou Mais Lobos	Bilateral	Lobo Sup Dir	Lobo Médio	Lobo Inf Dir	Lobo Sup Esq	Lobo Inf Esq	NO	YES	NO	YES	NO	NO	YES	NO
652	71-80	3	2020-03-12	POSITIVE FOR COVID	YES	1	Grave (>50%)	Vidro Fosco Pura		Pav Mosaico	Sinal do Halo Reverso	Espessamento Brônquico			Central e Periferico	Dois ou Mais Lobos	Bilateral	Lobo Sup Dir	Lobo Médio	Lobo Inf Dir	Lobo Sup Esq	Lobo Inf Esq	YES	1	Grave (>50%)	Vidro Fosco Pura	#REF!		Pav Mosaico		Espessamento Brônquico			Central e Periferico	Dois ou Mais Lobos	Bilateral	Lobo Sup Dir	Lobo Médio	Lobo Inf Dir	Lobo Sup Esq	Lobo Inf Esq	YES	YES	YES	YES	NO	NO	YES	NO
653	>80	2	2020-03-17	POSITIVE FOR COVID	NO	0	1 - Leve (<25%)	Vidro Fosco Pura							Periferico	Dois ou Mais Lobos	Bilateral	Lobo Sup Dir		Lobo Inf Dir	Lobo Sup Esq	Lobo Inf Esq	YES	0	1 - Leve (<25%)	Vidro Fosco Pura	#REF!							Periferico	Dois ou Mais Lobos	Bilateral	Lobo Sup Dir		Lobo Inf Dir	Lobo Sup Esq	Lobo Inf Esq	NO	YES	YES	YES	NO	NO	NO	NO
654	71-80	1	2020-03-17	POSITIVE FOR COVID	NO		1 - Leve (<25%)	Vidro Fosco Pura	Aspecto Redondo	Pav Mosaico					Central e Periferico	Dois ou Mais Lobos	Bilateral	Lobo Sup Dir	Lobo Médio	Lobo Inf Dir	Lobo Sup Esq	Lobo Inf Esq	YES		2 - Moderado (25-50%)	Vidro Fosco Pura	#REF!	Aspecto Redondo	Pav Mosaico					Central e Periferico	Dois ou Mais Lobos	Bilateral	Lobo Sup Dir	Lobo Médio	Lobo Inf Dir	Lobo Sup Esq	Lobo Inf Esq	YES	YES	YES	NO	NO	NO	NO	NO
655	61-70	1	2020-03-18	POSITIVE FOR COVID	NO		1 - Leve (<25%)	Vidro Fosco Pura	Aspecto Redondo	Pav Mosaico		Espessamento Brônquico			Periferico	Dois ou Mais Lobos	Bilateral	Lobo Sup Dir	Lobo Médio	Lobo Inf Dir	Lobo Sup Esq	Lobo Inf Esq					#REF!								Unico Lobo	Unilateral						NO	NO	YES	NO	NO	YES	YES	NO
656	71-80	1	2020-03-23	POSITIVE FOR COVID	NO	1	1 - Leve (<25%)	Vidro Fosco Pura	Aspecto Redondo	Pav Mosaico					Periferico	Dois ou Mais Lobos	Bilateral	Lobo Sup Dir		Lobo Inf Dir	Lobo Sup Esq	Lobo Inf Esq		1			#REF!								Unico Lobo	Unilateral						YES	YES	YES	YES	NO	NO	NO	NO
657	>80	2	2020-03-20	POSITIVE FOR COVID	YES	1	2 - Moderado (25-50%)	Vidro Fosco Pura		Pav Mosaico		Espessamento Brônquico			Central e Periferico	Dois ou Mais Lobos	Bilateral	Lobo Sup Dir	Lobo Médio	Lobo Inf Dir	Lobo Sup Esq	Lobo Inf Esq	YES	1	2 - Moderado (25-50%)	Vidro Fosco Pura	#REF!	Aspecto Redondo	Pav Mosaico		Espessamento Brônquico			Central e Periferico	Dois ou Mais Lobos	Bilateral	Lobo Sup Dir	Lobo Médio	Lobo Inf Dir	Lobo Sup Esq	Lobo Inf Esq	NO	NO	NO	NO	NO	NO	NO	NO
658	61-70	2	2020-03-19	POSITIVE FOR COVID	NO	1	2 - Moderado (25-50%)	Vidro Fosco e Consolidação		Pav Mosaico		Espessamento Brônquico			Central e Periferico	Dois ou Mais Lobos	Bilateral	Lobo Sup Dir	Lobo Médio	Lobo Inf Dir	Lobo Sup Esq	Lobo Inf Esq	YES	1	2 - Moderado (25-50%)	Vidro Fosco e Consolidação	#REF!	Aspecto Redondo	Pav Mosaico		Espessamento Brônquico			Central e Periferico	Dois ou Mais Lobos	Bilateral	Lobo Sup Dir	Lobo Médio	Lobo Inf Dir	Lobo Sup Esq	Lobo Inf Esq	YES	NO	YES	NO	NO	NO	NO	NO
[truncated: 23 more columns]
